# Supplementary material
Source: Research Square preprint supplement (doi:10.21203/rs.3.rs-9931798/v1)

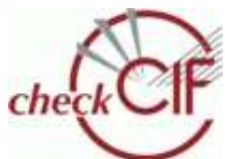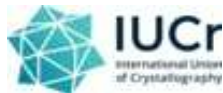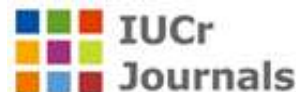

## checkCIF/PLATON report

Structure factors have been supplied for datablock(s) Pd6L8

THIS REPORT IS FOR GUIDANCE ONLY. IF USED AS PART OF A REVIEW PROCEDURE FOR PUBLICATION, IT SHOULD NOT REPLACE THE EXPERTISE OF AN EXPERIENCED CRYSTALLOGRAPHIC REFEREE.

No syntax errors found.      CIF dictionary      Interpreting this report

### Datablock: Pd6L8

---

|                        |                                         |                          |                           |
|------------------------|-----------------------------------------|--------------------------|---------------------------|
| Bond precision:        | C-C = 0.0120 Å                          | Wavelength=1.34050       |                           |
| Cell:                  | a=36.6353 (5)<br>alpha=90               | b=36.6353 (5)<br>beta=90 | c=36.6353 (5)<br>gamma=90 |
| Temperature:           | 253 K                                   |                          |                           |
|                        | Calculated                              | Reported                 |                           |
| Volume                 | 49170 (2)                               | 49170 (2)                |                           |
| Space group            | F m -3 m                                | F m -3 m                 |                           |
| Hall group             | -F 4 2 3                                | -F 4 2 3                 |                           |
| Moiety formula         | C264 H192 N24 O16 P4 Pd3 [+<br>solvent] | C264 H192 N24 O16 P4 Pd3 |                           |
| Sum formula            | C264 H192 N24 O16 P4 Pd3 [+<br>solvent] | C264 H192 N24 O16 P4 Pd3 |                           |
| Mr                     | 4399.50                                 | 4399.50                  |                           |
| Dx, g cm <sup>-3</sup> | 1.189                                   | 1.189                    |                           |
| Z                      | 8                                       | 8                        |                           |
| Mu (mm <sup>-1</sup> ) | 1.677                                   | 1.677                    |                           |
| F000                   | 18160.0                                 | 18160.0                  |                           |
| F000'                  | 18205.00                                |                          |                           |
| h, k, lmax             | 37, 37, 37                              | 36, 36, 36               |                           |
| Nref                   | 1399                                    | 1369                     |                           |
| Tmin, Tmax             | 0.551, 0.669                            | 0.384, 1.000             |                           |
| Tmin'                  | 0.487                                   |                          |                           |



Wavelength given = 1.34050

|                   |                                                     |       |        |
|-------------------|-----------------------------------------------------|-------|--------|
| PLAT029_ALERT_3_C | _diffn_measured_fraction_theta_full value Low .     | 0.979 | Why?   |
| PLAT082_ALERT_2_C | High R1 Value .....                                 | 0.14  | Report |
| PLAT094_ALERT_2_C | Ratio of Maximum / Minimum Residual Density ....    | 3.07  | Report |
| PLAT220_ALERT_2_C | NonSolvent Resd 1 C Ueq(max)/Ueq(min) Range         | 3.8   | Ratio  |
| PLAT234_ALERT_4_C | Large Hirshfeld Difference C10_1 --C11_1 .          | 0.17  | Ang.   |
| PLAT241_ALERT_2_C | High MainResAtom Ueq as Compared to Neighbours      | N1_1  | Check  |
| PLAT241_ALERT_2_C | High MainResAtom Ueq as Compared to Neighbours      | C11_1 | Check  |
| PLAT241_ALERT_2_C | High MainResAtom Ueq as Compared to Neighbours      | C13_1 | Check  |
| PLAT242_ALERT_2_C | Low MainResAtom Ueq as Compared to Neighbours       | P2    | Check  |
| PLAT260_ALERT_2_C | Large Average Ueq of Residue Including Pd1          | 0.170 | Check  |
| PLAT309_ALERT_2_C | Single Bonded Oxygen (C-O > 1.3 Ang) .....          | O14_1 | Check  |
| PLAT342_ALERT_3_C | Low Bond Precision on C-C Bonds .....               | 0.012 | Ang.   |
| PLAT911_ALERT_3_C | Missing FCF Refl Between Thmin & STh/L= 0.507       | 23    | Report |
|                   | 2 2 2, 0 4 4, 0 6 6, 1 1 7, 0 4 8, 2 4 8,           |       |        |
|                   | 2 6 8, 0 8 10, 6 8 10, 8 14 14, 1 1 15, 0 10 16,    |       |        |
|                   | 2 12 16, 7 9 17, 2 4 18, 5 7 21, 1 11 21, 20 22 22, |       |        |
|                   | 5 11 23, 20 20 24, 11 25 25, 10 10 34, 4 8 36,      |       |        |
| PLAT918_ALERT_3_C | Reflection(s) with I(obs) much Smaller I(calc) .    | 18    | Check  |
|                   | 1 1 1, 1 3 3, 3 3 3, 0 2 4, 2 2 4, 1 5 7,           |       |        |
|                   | 5 5 7, 2 2 8, 1 3 9, 1 7 9, 2 8 10, 1 7 11,         |       |        |
|                   | 10 10 12, 3 5 13, 0 2 14, 0 4 14, 0 10 14, 2 6 16,  |       |        |
| PLAT977_ALERT_2_C | Check Negative Difference Density on H13_1 .        | -0.31 | eA-3   |

### Alert level G

ABSMU01\_ALERT\_1\_G Calculation of \_exptl\_absorpt\_correction\_mu not performed for this radiation type.

|                   |                                                            |             |        |
|-------------------|------------------------------------------------------------|-------------|--------|
| PLAT002_ALERT_2_G | Number of Distance or Angle Restraints on AtSite           | 4           | Note   |
| PLAT003_ALERT_2_G | Number of Uiso or U(i,j) Restrained non-H-Atoms            | 13          | Report |
| PLAT172_ALERT_4_G | The CIF-Embedded .res File Contains DFIX Records           | 1           | Report |
| PLAT174_ALERT_4_G | The CIF-Embedded .res File Contains FLAT Records           | 1           | Report |
| PLAT176_ALERT_4_G | The CIF-Embedded .res File Contains SADI Records           | 1           | Report |
| PLAT177_ALERT_4_G | The CIF-Embedded .res File Contains DELU Records           | 1           | Report |
| PLAT178_ALERT_4_G | The CIF-Embedded .res File Contains SIMU Records           | 1           | Report |
| PLAT232_ALERT_2_G | Hirshfeld Test Diff (M-X) Pd1 --N1_1 .                     | 8.4         | s.u.   |
| PLAT299_ALERT_4_G | Atom Site Occupancy Constrained at .....                   | 0.5         | Check  |
|                   | O14_1 C10_1 C12_1                                          |             |        |
| PLAT301_ALERT_3_G | Main Residue Disorder .....(Resd 1)                        | 10%         | Note   |
| PLAT304_ALERT_4_G | Non-Integer Number of Atoms in ..... (Resd 1)              | 251.50      | Check  |
| PLAT380_ALERT_4_G | Incorrectly? Oriented X(sp2)-Methyl Moiety .....           | C1_3        | Check  |
| PLAT606_ALERT_4_G | Solvent Accessible VOID(S) in Crystal Structure            | !           | Info   |
| PLAT789_ALERT_4_G | Atoms with Negative _atom_site_disorder_group #            | 22          | Check  |
| PLAT822_ALERT_4_G | CIF-embedded .res Contains Negative PART Numbers           | 2           | Check  |
| PLAT860_ALERT_3_G | Number of Least-Squares Restraints .....                   | 123         | Note   |
| PLAT869_ALERT_4_G | ALERTS Related to the Use of SQUEEZE Suppressed            | !           | Info   |
| PLAT883_ALERT_1_G | Absent Datum for _atom_sites_solution_primary ..           | Please Do ! |        |
| PLAT899_ALERT_4_G | SHELXL2018 is Outdated and Succeeded by SHELXL             | 2019/3      | Note   |
| PLAT909_ALERT_3_G | Percentage of I>2sig(I) Data at Theta(Max) Still           | 70%         | Note   |
| PLAT913_ALERT_3_G | Missing # of Very Strong Reflections in FCF ....           | 1           | Note   |
|                   | 2 2 2,                                                     |             |        |
| PLAT933_ALERT_2_G | Number of HKL-OMIT Records in Embedded .res File           | 14          | Note   |
|                   | 1 1 7, 2 4 8, 2 6 8, 0 8 10, 6 8 10, 0 10 16,              |             |        |
|                   | 1 11 21, 5 11 23, 8 14 14, 1 1 15, 2 12 16, 7 9 17,        |             |        |
|                   | 2 4 18, 5 7 21,                                            |             |        |
| PLAT969_ALERT_5_G | The 'Henn et al.' R-Factor-gap value .....                 | 32.650      | Note   |
|                   | Predicted wR2: Based on SigI**2 1.18 or SHELX Weight 20.49 |             |        |

PLAT978\_ALERT\_2\_G Number C-C Bonds with Positive Residual Density. 0 Info  
PLAT994\_ALERT\_1\_G SHELXL .ins Contains no or MERG 0 Instruction .. ! Note

---

2 **ALERT level A** = Most likely a serious problem - resolve or explain  
2 **ALERT level B** = A potentially serious problem, consider carefully  
17 **ALERT level C** = Check. Ensure it is not caused by an omission or oversight  
26 **ALERT level G** = General information/check it is not something unexpected

5 ALERT type 1 CIF construction/syntax error, inconsistent or missing data  
17 ALERT type 2 Indicator that the structure model may be wrong or deficient  
10 ALERT type 3 Indicator that the structure quality may be low  
14 ALERT type 4 Improvement, methodology, query or suggestion  
1 ALERT type 5 Informative message, check

---

---

It is advisable to attempt to resolve as many as possible of the alerts in all categories. Often the minor alerts point to easily fixed oversights, errors and omissions in your CIF or refinement strategy, so attention to these fine details can be worthwhile. It is up to the individual to critically assess their own results and, if necessary, seek expert advice.

---

**PLATON version of 15/01/2026; check.def file version of 02/01/2026**

---

## **duplicate check**

**No duplication found**

---

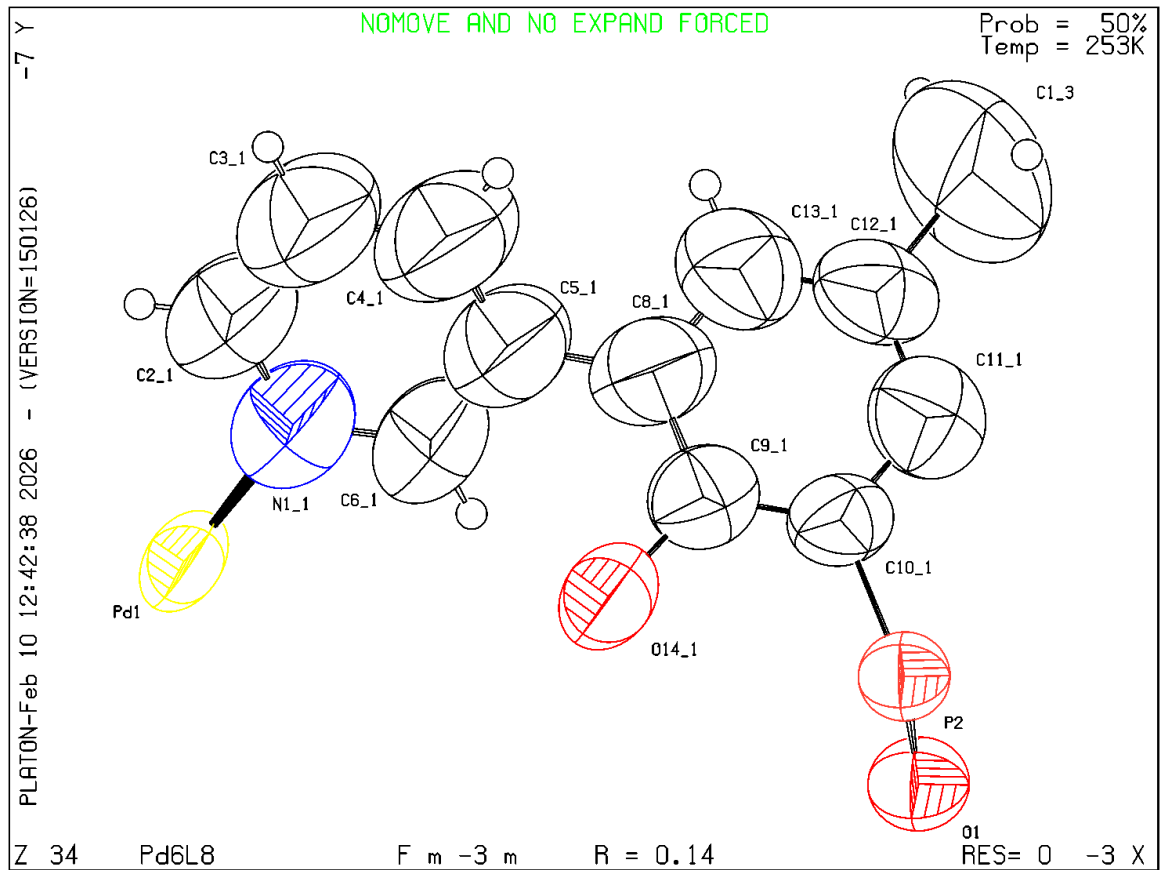

Supplement: Supplementary file 3 [file 91c6ecdf7b60a40b3895c223.pdf]
