# Supplementary material
Source: Research Square preprint supplement (doi:10.21203/rs.3.rs-9931798/v1)

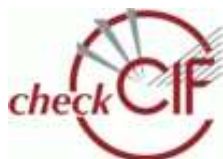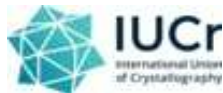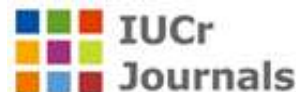

## checkCIF/PLATON report

Structure factors have been supplied for datablock(s) mhw03\_sq

THIS REPORT IS FOR GUIDANCE ONLY. IF USED AS PART OF A REVIEW PROCEDURE FOR PUBLICATION, IT SHOULD NOT REPLACE THE EXPERTISE OF AN EXPERIENCED CRYSTALLOGRAPHIC REFEREE.

No syntax errors found.      CIF dictionary      Interpreting this report

### Datablock: mhw03\_sq

---

Bond precision:      C-C = 0.0224 Å

Wavelength=0.71073

Cell:                      a=34.9006(7)                      b=34.9006(7)                      c=56.377(2)

                            alpha=90

                            beta=90

                            gamma=90

Temperature:              193 K

|                        | Calculated                                                    | Reported                          |
|------------------------|---------------------------------------------------------------|-----------------------------------|
| Volume                 | 68670(4)                                                      | 68670(4)                          |
| Space group            | P 43                                                          | P 43                              |
| Hall group             | P 4cw                                                         | P 4cw                             |
| Moiety formula         | 2(C264 H144 N24 O32 P8 Pd6), 5(B F4), 12(C2 H3 N) [+ solvent] | ?                                 |
| Sum formula            | C552 H324 B5 F20 N60 O64 P16 Pd12 [+ solvent]                 | C552 H324 B5 F20 N60 O64 P16 Pd12 |
| Mr                     | 11026.99                                                      | 11027.06                          |
| Dx, g cm <sup>-3</sup> | 1.067                                                         | 1.067                             |
| Z                      | 4                                                             | 4                                 |
| Mu (mm <sup>-1</sup> ) | 0.406                                                         | 0.406                             |
| F000                   | 22260.0                                                       | 22260.0                           |
| F000'                  | 22228.18                                                      |                                   |
| h, k, lmax             | 42, 42, 68                                                    | 42, 42, 68                        |
| Nref                   | 128109[ 64758]                                                | 126434                            |
| Tmin, Tmax             | 0.922, 0.922                                                  | 0.544, 0.753                      |
| Tmin'                  | 0.922                                                         |                                   |

Correction method= # Reported T Limits: Tmin=0.544 Tmax=0.753  
AbsCorr = MULTI-SCAN

Data completeness= 1.95/0.99                      Theta(max)= 25.515

R(reflections)= 0.1331( 99350)                                              wR2(reflections)=  
0.3486(126434)

S = 1.176                                              Npar= 6562

---

The following ALERTS were generated. Each ALERT has the format

**test-name\_ALERT\_alert-type\_alert-level.**

Click on the hyperlinks for more details of the test.

---

 **Alert level B**

PLAT342\_ALERT\_3\_B Low Bond Precision on C-C Bonds ..... 0.02238 Ang.

**Author Response: The flexibility of the modelled structure is reflected in the low precision of C-C bonds.**

---

 **Alert level C**

RINTA01\_ALERT\_3\_C The value of Rint is greater than 0.12

Rint given 0.150

|                   |                                                |        |        |
|-------------------|------------------------------------------------|--------|--------|
| PLAT020_ALERT_3_C | The Value of Rint is Greater Than 0.12 .....   | 0.150  | Report |
| PLAT082_ALERT_2_C | High R1 Value .....                            | 0.13   | Report |
| PLAT084_ALERT_2_C | High wR2 Value (i.e. > 0.25) .....             | 0.35   | Report |
| PLAT241_ALERT_2_C | High MainResAtom Ueq as Compared to Neighbours | O27_2  | Check  |
| PLAT241_ALERT_2_C | High MainResAtom Ueq as Compared to Neighbours | C3_2   | Check  |
| PLAT241_ALERT_2_C | High MainResAtom Ueq as Compared to Neighbours | C38_2  | Check  |
| PLAT241_ALERT_2_C | High MainResAtom Ueq as Compared to Neighbours | C31_3  | Check  |
| PLAT241_ALERT_2_C | High MainResAtom Ueq as Compared to Neighbours | C32_4  | Check  |
| PLAT241_ALERT_2_C | High MainResAtom Ueq as Compared to Neighbours | C38_5  | Check  |
| PLAT241_ALERT_2_C | High MainResAtom Ueq as Compared to Neighbours | C15_6  | Check  |
| PLAT241_ALERT_2_C | High MainResAtom Ueq as Compared to Neighbours | C32_6  | Check  |
| PLAT241_ALERT_2_C | High MainResAtom Ueq as Compared to Neighbours | C39_6  | Check  |
| PLAT241_ALERT_2_C | High MainResAtom Ueq as Compared to Neighbours | C31_7  | Check  |
| PLAT241_ALERT_2_C | High MainResAtom Ueq as Compared to Neighbours | C32_8  | Check  |
| PLAT241_ALERT_2_C | High MainResAtom Ueq as Compared to Neighbours | C4_9   | Check  |
| PLAT241_ALERT_2_C | High MainResAtom Ueq as Compared to Neighbours | C32_9  | Check  |
| PLAT241_ALERT_2_C | High MainResAtom Ueq as Compared to Neighbours | O28_11 | Check  |
| PLAT241_ALERT_2_C | High MainResAtom Ueq as Compared to Neighbours | O28_13 | Check  |
| PLAT241_ALERT_2_C | High MainResAtom Ueq as Compared to Neighbours | O13_14 | Check  |
| PLAT241_ALERT_2_C | High MainResAtom Ueq as Compared to Neighbours | O28_14 | Check  |
| PLAT241_ALERT_2_C | High MainResAtom Ueq as Compared to Neighbours | O28_16 | Check  |
| PLAT241_ALERT_2_C | High MainResAtom Ueq as Compared to Neighbours | N34_18 | Check  |
| PLAT241_ALERT_2_C | High MainResAtom Ueq as Compared to Neighbours | C23_11 | Check  |
| PLAT241_ALERT_2_C | High MainResAtom Ueq as Compared to Neighbours | C37_11 | Check  |
| PLAT241_ALERT_2_C | High MainResAtom Ueq as Compared to Neighbours | C12_12 | Check  |
| PLAT241_ALERT_2_C | High MainResAtom Ueq as Compared to Neighbours | C9_13  | Check  |
| PLAT241_ALERT_2_C | High MainResAtom Ueq as Compared to Neighbours | C32_13 | Check  |

|                   |         |                                          |                                |         |         |        |            |
|-------------------|---------|------------------------------------------|--------------------------------|---------|---------|--------|------------|
| PLAT241_ALERT_2_C | High    | MainResAtom                              | Ueq as Compared to Neighbours  | C15_14  | Check   |        |            |
| PLAT241_ALERT_2_C | High    | MainResAtom                              | Ueq as Compared to Neighbours  | C32_14  | Check   |        |            |
| PLAT241_ALERT_2_C | High    | MainResAtom                              | Ueq as Compared to Neighbours  | C38_14  | Check   |        |            |
| PLAT241_ALERT_2_C | High    | MainResAtom                              | Ueq as Compared to Neighbours  | C3_15   | Check   |        |            |
| PLAT241_ALERT_2_C | High    | MainResAtom                              | Ueq as Compared to Neighbours  | C23_15  | Check   |        |            |
| PLAT241_ALERT_2_C | High    | MainResAtom                              | Ueq as Compared to Neighbours  | C37_15  | Check   |        |            |
| PLAT241_ALERT_2_C | High    | MainResAtom                              | Ueq as Compared to Neighbours  | C23_16  | Check   |        |            |
| PLAT241_ALERT_2_C | High    | MainResAtom                              | Ueq as Compared to Neighbours  | C31_17  | Check   |        |            |
| PLAT241_ALERT_2_C | High    | MainResAtom                              | Ueq as Compared to Neighbours  | C4_18   | Check   |        |            |
| PLAT241_ALERT_2_C | High    | MainResAtom                              | Ueq as Compared to Neighbours  | C15_18  | Check   |        |            |
| PLAT242_ALERT_2_C | Low     | MainResAtom                              | Ueq as Compared to Neighbours  | Pd2_1   | Check   |        |            |
| PLAT242_ALERT_2_C | Low     | MainResAtom                              | Ueq as Compared to Neighbours  | Pd6_1   | Check   |        |            |
| PLAT242_ALERT_2_C | Low     | MainResAtom                              | Ueq as Compared to Neighbours  | C30_3   | Check   |        |            |
| PLAT242_ALERT_2_C | Low     | MainResAtom                              | Ueq as Compared to Neighbours  | C7_4    | Check   |        |            |
| PLAT242_ALERT_2_C | Low     | MainResAtom                              | Ueq as Compared to Neighbours  | C18_5   | Check   |        |            |
| PLAT242_ALERT_2_C | Low     | MainResAtom                              | Ueq as Compared to Neighbours  | C16_6   | Check   |        |            |
| PLAT242_ALERT_2_C | Low     | MainResAtom                              | Ueq as Compared to Neighbours  | C26_8   | Check   |        |            |
| PLAT242_ALERT_2_C | Low     | MainResAtom                              | Ueq as Compared to Neighbours  | N1_17   | Check   |        |            |
| PLAT243_ALERT_4_C | High    | MinorResAtom                             | Ueq as Compared to Neighbours  | C2_28   | Check   |        |            |
| PLAT244_ALERT_4_C | Low     | MinorResAtom                             | Ueq as Compared to Neighbours  | C2_26   | Check   |        |            |
| PLAT244_ALERT_4_C | Low     | MinorResAtom                             | Ueq as Compared to Neighbours  | C2_27   | Check   |        |            |
| PLAT244_ALERT_4_C | Low     | MinorResAtom                             | Ueq as Compared to Neighbours  | C2_29   | Check   |        |            |
| PLAT244_ALERT_4_C | Low     | MinorResAtom                             | Ueq as Compared to Neighbours  | C2_33   | Check   |        |            |
| PLAT244_ALERT_4_C | Low     | MinorResAtom                             | Ueq as Compared to Neighbours  | C2_35   | Check   |        |            |
| PLAT260_ALERT_2_C | Large   | Average                                  | Ueq of Residue Including F2_19 | 0.144   | Check   |        |            |
| PLAT260_ALERT_2_C | Large   | Average                                  | Ueq of Residue Including F2_20 | 0.149   | Check   |        |            |
| PLAT260_ALERT_2_C | Large   | Average                                  | Ueq of Residue Including F2_21 | 0.133   | Check   |        |            |
| PLAT260_ALERT_2_C | Large   | Average                                  | Ueq of Residue Including F2_34 | 0.166   | Check   |        |            |
| PLAT260_ALERT_2_C | Large   | Average                                  | Ueq of Residue Including F2_36 | 0.165   | Check   |        |            |
| PLAT260_ALERT_2_C | Large   | Average                                  | Ueq of Residue Including N1_26 | 0.122   | Check   |        |            |
| PLAT260_ALERT_2_C | Large   | Average                                  | Ueq of Residue Including N1_28 | 0.112   | Check   |        |            |
| PLAT260_ALERT_2_C | Large   | Average                                  | Ueq of Residue Including N1_29 | 0.135   | Check   |        |            |
| PLAT260_ALERT_2_C | Large   | Average                                  | Ueq of Residue Including N1_35 | 0.107   | Check   |        |            |
| PLAT911_ALERT_3_C | Missing | FCF Refl Between Thmin & STh/L=          | 0.600                          | 9       | Report  |        |            |
|                   | -1      | 6 0,                                     | 1 6 0,                         | 5 8 0,  | -1 3 2, | 1 3 2, | 0 0 4,     |
|                   |         | 0 2 4,                                   | 3 3 6,                         | 1 3 21, |         |        |            |
| PLAT913_ALERT_3_C | Missing | # of Very Strong Reflections in FCF .... |                                |         |         |        | 5 Note     |
|                   | -1      | 3 2,                                     | 1 3 2,                         | 0 0 4,  | 0 2 4,  | 3 3 6, |            |
| PLAT972_ALERT_2_C | Check   | Calcd Resid. Dens.                       | 0.77Ang From Pd4_1             |         |         |        | -1.91 eA-3 |
| PLAT972_ALERT_2_C | Check   | Calcd Resid. Dens.                       | 0.56Ang From Pd6_1             |         |         |        | -1.85 eA-3 |
| PLAT972_ALERT_2_C | Check   | Calcd Resid. Dens.                       | 0.59Ang From Pd6_1             |         |         |        | -1.80 eA-3 |
| PLAT972_ALERT_2_C | Check   | Calcd Resid. Dens.                       | 0.68Ang From Pd5_10            |         |         |        | -1.70 eA-3 |
| PLAT972_ALERT_2_C | Check   | Calcd Resid. Dens.                       | 0.51Ang From Pd5_1             |         |         |        | -1.69 eA-3 |
| PLAT972_ALERT_2_C | Check   | Calcd Resid. Dens.                       | 0.56Ang From Pd1_1             |         |         |        | -1.60 eA-3 |
| PLAT972_ALERT_2_C | Check   | Calcd Resid. Dens.                       | 0.61Ang From Pd3_10            |         |         |        | -1.60 eA-3 |
| PLAT972_ALERT_2_C | Check   | Calcd Resid. Dens.                       | 0.66Ang From Pd3_10            |         |         |        | -1.51 eA-3 |
| PLAT977_ALERT_2_C | Check   | Negative Difference Density              | on H37_3                       | .       |         |        | -0.36 eA-3 |
| PLAT977_ALERT_2_C | Check   | Negative Difference Density              | on H16_4                       | .       |         |        | -0.31 eA-3 |
| PLAT977_ALERT_2_C | Check   | Negative Difference Density              | on H38_4                       | .       |         |        | -0.41 eA-3 |
| PLAT977_ALERT_2_C | Check   | Negative Difference Density              | on H41_5                       | .       |         |        | -0.31 eA-3 |
| PLAT977_ALERT_2_C | Check   | Negative Difference Density              | on H9_6                        | .       |         |        | -0.49 eA-3 |
| PLAT977_ALERT_2_C | Check   | Negative Difference Density              | on H8_8                        | .       |         |        | -0.33 eA-3 |
| PLAT977_ALERT_2_C | Check   | Negative Difference Density              | on H31_9                       | .       |         |        | -0.37 eA-3 |
| PLAT977_ALERT_2_C | Check   | Negative Difference Density              | on H39_9                       | .       |         |        | -0.33 eA-3 |
| PLAT977_ALERT_2_C | Check   | Negative Difference Density              | on H8_12                       | .       |         |        | -0.35 eA-3 |
| PLAT977_ALERT_2_C | Check   | Negative Difference Density              | on H16_14                      | .       |         |        | -0.34 eA-3 |
| PLAT977_ALERT_2_C | Check   | Negative Difference Density              | on H35_15                      | .       |         |        | -0.49 eA-3 |

PLAT977\_ALERT\_2\_C Check Negative Difference Density on H39\_16 . -0.57 eA-3  
 PLAT977\_ALERT\_2\_C Check Negative Difference Density on H23\_17 . -0.62 eA-3  
 PLAT977\_ALERT\_2\_C Check Negative Difference Density on H3A\_23 . -0.31 eA-3

---

● **Alert level G**

PLAT002\_ALERT\_2\_G Number of Distance or Angle Restraints on AtSite 717 Note  
 PLAT003\_ALERT\_2\_G Number of Uiso or U(i,j) Restrained non-H-Atoms 717 Report  
 PLAT072\_ALERT\_2\_G SHELXL First Parameter in WGHT Unusually Large 0.25 Report  
 PLAT172\_ALERT\_4\_G The CIF-Embedded .res File Contains DFIX Records 58 Report  
 PLAT173\_ALERT\_4\_G The CIF-Embedded .res File Contains DANG Records 85 Report  
 PLAT174\_ALERT\_4\_G The CIF-Embedded .res File Contains FLAT Records 18 Report  
 PLAT178\_ALERT\_4\_G The CIF-Embedded .res File Contains SIMU Records 1 Report  
 PLAT187\_ALERT\_4\_G The CIF-Embedded .res File Contains RIGU Records 1 Report  
 PLAT244\_ALERT\_4\_G Low MinorResAtom Ueq as Compared to Neighbours B1\_19 Check  
 PLAT244\_ALERT\_4\_G Low MinorResAtom Ueq as Compared to Neighbours B1\_20 Check  
 PLAT244\_ALERT\_4\_G Low MinorResAtom Ueq as Compared to Neighbours B1\_21 Check  
 PLAT244\_ALERT\_4\_G Low MinorResAtom Ueq as Compared to Neighbours B1\_34 Check  
 PLAT244\_ALERT\_4\_G Low MinorResAtom Ueq as Compared to Neighbours B1\_36 Check  
 PLAT344\_ALERT\_2\_G Unusual sp? Angle Range in Solvent/Ion for C2\_28 Check  
 PLAT367\_ALERT\_2\_G Long? C(sp?)-C(sp?) Bond C2\_28 - C3\_28 . 1.52 Ang.  
 PLAT606\_ALERT\_4\_G Solvent Accessible VOID(S) in Crystal Structure ! Info  
 PLAT608\_ALERT\_4\_G ADDSYM Test Skipped (Too Time-consuming) ! Info  
 PLAT794\_ALERT\_5\_G Tentative Bond Valency for Pd1\_1 (II) . 2.30 Info  
 PLAT794\_ALERT\_5\_G Tentative Bond Valency for Pd2\_1 (II) . 2.25 Info  
 PLAT794\_ALERT\_5\_G Tentative Bond Valency for Pd3\_1 (II) . 2.23 Info  
 PLAT794\_ALERT\_5\_G Tentative Bond Valency for Pd4\_1 (II) . 2.37 Info  
 PLAT794\_ALERT\_5\_G Tentative Bond Valency for Pd5\_1 (II) . 2.18 Info  
 PLAT794\_ALERT\_5\_G Tentative Bond Valency for Pd6\_1 (II) . 2.46 Info  
 PLAT794\_ALERT\_5\_G Tentative Bond Valency for Pd1\_10 (II) . 2.25 Info  
 PLAT794\_ALERT\_5\_G Tentative Bond Valency for Pd2\_10 (II) . 2.27 Info  
 PLAT794\_ALERT\_5\_G Tentative Bond Valency for Pd3\_10 (II) . 2.19 Info  
 PLAT794\_ALERT\_5\_G Tentative Bond Valency for Pd4\_10 (II) . 2.29 Info  
 PLAT794\_ALERT\_5\_G Tentative Bond Valency for Pd5\_10 (II) . 2.36 Info  
 PLAT794\_ALERT\_5\_G Tentative Bond Valency for Pd6\_10 (II) . 2.26 Info  
 PLAT860\_ALERT\_3\_G Number of Least-Squares Restraints ..... 13489 Note  
 PLAT869\_ALERT\_4\_G ALERTS Related to the Use of SQUEEZE Suppressed ! Info  
 PLAT910\_ALERT\_3\_G Missing FCF Reflection(s) Below Theta(Min) [Deg]= 0.83 Note  
           0 1 0, 0 1 1,  
 PLAT912\_ALERT\_4\_G Missing # of FCF Reflections Above STh/L= 0.600 239 Note  
 PLAT916\_ALERT\_2\_G Hooft y and Flack x Parameter Values Differ by . 0.25 Check  
 PLAT930\_ALERT\_2\_G FCF-based Twin Law ( 1 0 0) Est.d BASF 0.29 Check  
 PLAT931\_ALERT\_5\_G CIFcalcFCF Twin Law ( 1 0 0) Est.d BASF 0.36 Check  
 PLAT933\_ALERT\_2\_G Number of HKL-OMIT Records in Embedded .res File 24 Note  
           1 8-27, 1 6-26, 3 9-26, 7 11-26, 8 10-25, 7 11-24,  
           2 6-23, 7 12-23, -2 3-22, 1 2-21, 1 3-21, -1 4-20,  
           1 7-20, -10 11-20, 3 11-20, -16 20-20, -1 4-19, 2 6-19,  
           3 11-18, 1 7-17, -1 3-16, -4 5-16, 7 9-16, -1 10-16,  
 PLAT969\_ALERT\_5\_G The 'Henn et al.' R-Factor-gap value ..... 4.353 Note  
           Predicted wR2: Based on SigI\*\*2 8.01 or SHELX Weight 30.05  
 PLAT978\_ALERT\_2\_G Number C-C Bonds with Positive Residual Density. 0 Info  
 PLAT994\_ALERT\_1\_G SHELXL .ins Contains no or MERG 0 Instruction .. ! Note

---

0 **ALERT level A** = Most likely a serious problem - resolve or explain  
 1 **ALERT level B** = A potentially serious problem, consider carefully  
 85 **ALERT level C** = Check. Ensure it is not caused by an omission or oversight

40 **ALERT level G** = General information/check it is not something unexpected

1 ALERT type 1 CIF construction/syntax error, inconsistent or missing data  
83 ALERT type 2 Indicator that the structure model may be wrong or deficient  
8 ALERT type 3 Indicator that the structure quality may be low  
20 ALERT type 4 Improvement, methodology, query or suggestion  
14 ALERT type 5 Informative message, check

It is advisable to attempt to resolve as many as possible of the alerts in all categories. Often the minor alerts point to easily fixed oversights, errors and omissions in your CIF or refinement strategy, so attention to these fine details can be worthwhile. It is up to the individual to critically assess their own results and, if necessary, seek expert advice.

**PLATON version of 15/01/2026; check.def file version of 02/01/2026**

Datablock mhw03\_sq - ellipsoid plot

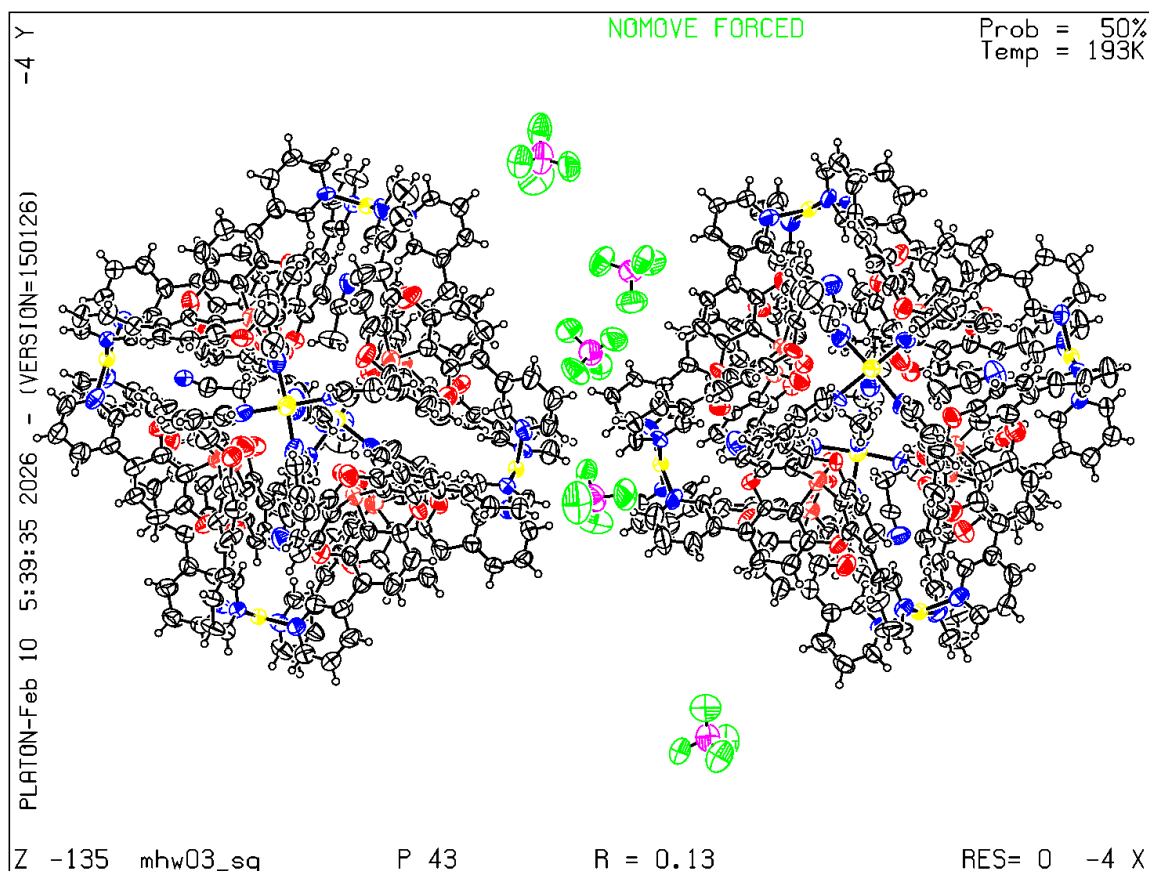

Supplement: Supplementary file 2 [file 544e3c802d68ee04452fca53.pdf]
