# Supplementary material
Source: Research Square preprint supplement (doi:10.21203/rs.3.rs-9931798/v1)

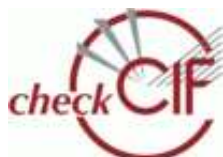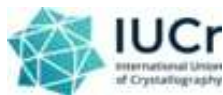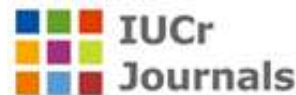

## checkCIF/PLATON report

Structure factors have been supplied for datablock(s) mhw01\_sq

THIS REPORT IS FOR GUIDANCE ONLY. IF USED AS PART OF A REVIEW PROCEDURE FOR PUBLICATION, IT SHOULD NOT REPLACE THE EXPERTISE OF AN EXPERIENCED CRYSTALLOGRAPHIC REFEREE.

No syntax errors found.      CIF dictionary      Interpreting this report

### Datablock: mhw01\_sq

---

Bond precision:    C-C = 0.0184 Å

Wavelength=0.71000

Cell:                    a=24.5588 (14)            b=25.8908 (15)            c=34.1752 (18)  
                          alpha=85.542 (3)        beta=84.761 (4)        gamma=83.319 (3)  
Temperature:        100 K

|                        | Calculated                                                             | Reported                                    |
|------------------------|------------------------------------------------------------------------|---------------------------------------------|
| Volume                 | 21443(2)                                                               | 21443(2)                                    |
| Space group            | P -1                                                                   | P -1                                        |
| Hall group             | -P 1                                                                   | -P 1                                        |
| Moiety formula         | C264 H144 N24 O32 P8 Pd6,<br>4.6(B F4), 7.8(C2 H6 O S)<br>[+ solvent]  | ?                                           |
| Sum formula            | C279.60 H190.80 B4.60<br>F18.40 N24 O39.80 P8 Pd6<br>S7.80 [+ solvent] | C280 H192 B4.60 F18.40 N24<br>O40 P8 Pd6 S8 |
| Mr                     | 6058.88                                                                | 6074.53                                     |
| Dx, g cm <sup>-3</sup> | 0.938                                                                  | 0.941                                       |
| Z                      | 2                                                                      | 2                                           |
| Mu (mm <sup>-1</sup> ) | 0.370                                                                  | 0.371                                       |
| F000                   | 6128.4                                                                 | 6145.0                                      |
| F000'                  | 6122.83                                                                |                                             |
| h, k, lmax             | 24, 25, 34                                                             | 24, 25, 34                                  |
| Nref                   | 44930                                                                  | 44832                                       |
| Tmin, Tmax             | 0.928, 0.928                                                           | 0.010, 0.082                                |
| Tmin'                  | 0.928                                                                  |                                             |

Correction method= # Reported T Limits: Tmin=0.010 Tmax=0.082  
AbsCorr = MULTI-SCAN

Data completeness= 0.998                      Theta(max)= 20.793

R(reflections)= 0.1407( 20672)                                              wR2(reflections)=  
0.5240( 44832)

S = 1.349                                              Npar= 3520

---

The following ALERTS were generated. Each ALERT has the format  
**test-name\_ALERT\_alert-type\_alert-level.**  
Click on the hyperlinks for more details of the test.

---

 **Alert level A**

THETM01\_ALERT\_3\_A The value of sine(theta\_max)/wavelength is less than 0.550  
Calculated sin(theta\_max)/wavelength = 0.5000

**Author Response: Despite the use of a long exposure time per degree for high resolution data on a microfocus sealed X-ray source, few reflections at greater than 1.0 Å were observed and the data was trimmed accordingly.**

PLAT084\_ALERT\_3\_A High wR2 Value (i.e. > 0.25) ..... 0.52 Report

**Author Response: The crystal rapidly loses solvent after removal from the mother liquor, resulting in poor crystal quality. Nevertheless geometry and ADP restraints ensure a chemically and physically meaningful structural model.**

PLAT973\_ALERT\_2\_A Check Calcd Positive Resid. Density on Pd2\_1 2.27 eA-3

**Author Response: The large residual hole is around the Pd atoms center, probably due to difficulties in absorption correction.**

PLAT973\_ALERT\_2\_A Check Calcd Positive Resid. Density on Pd1\_1 2.13 eA-3

**Author Response: The large residual hole is around the Pd atoms center, probably due to difficulties in absorption correction.**

---

 **Alert level B**

PLAT973\_ALERT\_2\_B Check Calcd Positive Resid. Density on Pd5\_1 1.90 eA-3

**Author Response: The large residual hole is around the Pd atoms center, probably due to difficulties in absorption correction.**

PLAT973\_ALERT\_2\_B Check Calcd Positive Resid. Density on Pd6\_1 1.76 eA-3

**Author Response: The large residual hole is around the Pd atoms center, probably due to difficulties in absorption correction.**

PLAT973\_ALERT\_2\_B Check Calcd Positive Resid. Density on Pd4\_1 1.75 eA-3

**Author Response: The large residual hole is around the Pd atoms center, probably due to difficulties in absorption correction.**

PLAT973\_ALERT\_2\_B Check Calcd Positive Resid. Density on Pd3\_1 1.63 eA-3

**Author Response: The large residual hole is around the Pd atoms center, probably due to difficulties in absorption correction.**

---

**Alert level C**

RADNW01\_ALERT\_1\_C The radiation wavelength lies outside the expected range  
for the supplied radiation type. Expected range 0.71065-0.71075  
Wavelength given = 0.71000

|                   |                                                  |       |              |
|-------------------|--------------------------------------------------|-------|--------------|
| PLAT026_ALERT_3_C | Ratio Observed / Unique Reflections (too) Low .. | 46%   | Check        |
| PLAT077_ALERT_4_C | Unit-Cell Contains Non-integer Number of Atoms . |       | Please Check |
| PLAT082_ALERT_2_C | High R1 Value .....                              | 0.14  | Report       |
| PLAT241_ALERT_2_C | High MainResAtom Ueq as Compared to Neighbours   | C38_2 | Check        |
| PLAT241_ALERT_2_C | High MainResAtom Ueq as Compared to Neighbours   | C32_3 | Check        |
| PLAT241_ALERT_2_C | High MainResAtom Ueq as Compared to Neighbours   | C4_4  | Check        |
| PLAT241_ALERT_2_C | High MainResAtom Ueq as Compared to Neighbours   | C32_4 | Check        |
| PLAT241_ALERT_2_C | High MainResAtom Ueq as Compared to Neighbours   | C32_5 | Check        |
| PLAT241_ALERT_2_C | High MainResAtom Ueq as Compared to Neighbours   | C3_6  | Check        |
| PLAT241_ALERT_2_C | High MainResAtom Ueq as Compared to Neighbours   | C3_7  | Check        |
| PLAT241_ALERT_2_C | High MainResAtom Ueq as Compared to Neighbours   | C32_7 | Check        |
| PLAT241_ALERT_2_C | High MainResAtom Ueq as Compared to Neighbours   | C38_7 | Check        |
| PLAT241_ALERT_2_C | High MainResAtom Ueq as Compared to Neighbours   | C31_8 | Check        |
| PLAT241_ALERT_2_C | High MainResAtom Ueq as Compared to Neighbours   | C32_8 | Check        |
| PLAT241_ALERT_2_C | High MainResAtom Ueq as Compared to Neighbours   | C37_8 | Check        |
| PLAT241_ALERT_2_C | High MainResAtom Ueq as Compared to Neighbours   | C39_8 | Check        |
| PLAT241_ALERT_2_C | High MainResAtom Ueq as Compared to Neighbours   | C38_9 | Check        |
| PLAT242_ALERT_2_C | Low MainResAtom Ueq as Compared to Neighbours    | Pd5_1 | Check        |
| PLAT242_ALERT_2_C | Low MainResAtom Ueq as Compared to Neighbours    | Pd6_1 | Check        |
| PLAT242_ALERT_2_C | Low MainResAtom Ueq as Compared to Neighbours    | C41_4 | Check        |
| PLAT242_ALERT_2_C | Low MainResAtom Ueq as Compared to Neighbours    | C30_8 | Check        |
| PLAT243_ALERT_4_C | High MinorResAtom Ueq as Compared to Neighbours  | S2_15 | Check        |
| PLAT243_ALERT_4_C | High MinorResAtom Ueq as Compared to Neighbours  | S2_16 | Check        |
| PLAT243_ALERT_4_C | High MinorResAtom Ueq as Compared to Neighbours  | S2_17 | Check        |
| PLAT243_ALERT_4_C | High MinorResAtom Ueq as Compared to Neighbours  | S2_20 | Check        |
| PLAT243_ALERT_4_C | High MinorResAtom Ueq as Compared to Neighbours  | S2_21 | Check        |
| PLAT244_ALERT_4_C | Low MinorResAtom Ueq as Compared to Neighbours   | S2_18 | Check        |

PLAT244\_ALERT\_4\_C Low MinorResAtom Ueq as Compared to Neighbours S2\_22 Check  
 PLAT260\_ALERT\_2\_C Large Average Ueq of Residue Including Pd1\_1 0.156 Check  
 PLAT260\_ALERT\_2\_C Large Average Ueq of Residue Including F2\_10 0.264 Check  
 PLAT260\_ALERT\_2\_C Large Average Ueq of Residue Including F2\_11 0.273 Check  
 PLAT260\_ALERT\_2\_C Large Average Ueq of Residue Including F2\_12 0.274 Check  
 PLAT260\_ALERT\_2\_C Large Average Ueq of Residue Including F2\_13 0.256 Check  
 PLAT260\_ALERT\_2\_C Large Average Ueq of Residue Including F2\_14 0.236 Check  
 PLAT260\_ALERT\_2\_C Large Average Ueq of Residue Including S2\_15 0.215 Check  
 PLAT260\_ALERT\_2\_C Large Average Ueq of Residue Including S2\_16 0.219 Check  
 PLAT260\_ALERT\_2\_C Large Average Ueq of Residue Including S2\_17 0.208 Check  
 PLAT260\_ALERT\_2\_C Large Average Ueq of Residue Including S2\_18 0.227 Check  
 PLAT260\_ALERT\_2\_C Large Average Ueq of Residue Including S2\_19 0.259 Check  
 PLAT260\_ALERT\_2\_C Large Average Ueq of Residue Including S2\_20 0.215 Check  
 PLAT260\_ALERT\_2\_C Large Average Ueq of Residue Including S2\_21 0.283 Check  
 PLAT260\_ALERT\_2\_C Large Average Ueq of Residue Including S2\_22 0.283 Check  
 PLAT342\_ALERT\_3\_C Low Bond Precision on C-C Bonds ..... 0.01841 Ang.  
 PLAT905\_ALERT\_3\_C Negative K value in the Analysis of Variance ... -2.893 Report  
 PLAT911\_ALERT\_3\_C Missing FCF Refl Between Thmin & STh/L= 0.500 96 Report  
     6 0 0, -7 1 0, 4 2 0, 8 2 0, 13 2 0, -5 4 0,  
    -3 4 0, 2 4 0, 1 6 0, 4 6 0, 3 12 0, -2 -9 1,  
     0 -8 1, 1 -7 1, 0 -6 1, 1 -6 1, -1 -5 1, 4 -5 1,  
     6 -5 1, -3 -4 1, 7 -3 1, -7 -1 1, -4 -1 1, -4 0 1,  
    17 8 1, 19 4 3, 17 8 5, 14 -9 7, 13 -8 7, 3 2 7,  
     ( 66 More NOT listed: see .ckf listing file)  
 PLAT918\_ALERT\_3\_C Reflection(s) with I(obs) much Smaller I(calc) . 1 Check  
     1 0 5,  
 PLAT971\_ALERT\_2\_C Check Calcd Resid. Dens. 0.04Ang From B1\_14 2.11 eA-3  
 PLAT971\_ALERT\_2\_C Check Calcd Resid. Dens. 1.23Ang From S2\_20 1.51 eA-3  
 PLAT972\_ALERT\_2\_C Check Calcd Resid. Dens. 0.96Ang From Pd6\_1 -1.60 eA-3  
 PLAT977\_ALERT\_2\_C Check Negative Difference Density on H2\_3 . -0.32 eA-3  
 PLAT977\_ALERT\_2\_C Check Negative Difference Density on H3B\_16 . -0.39 eA-3  
 PLAT977\_ALERT\_2\_C Check Negative Difference Density on H3C\_19 . -0.41 eA-3  
 PLAT977\_ALERT\_2\_C Check Negative Difference Density on H4A\_21 . -0.31 eA-3

### ● Alert level G

FORMU01\_ALERT\_2\_G There is a discrepancy between the atom counts in the  
     \_chemical\_formula\_sum and the formula from the \_atom\_site\* data.  
     Atom count from \_chemical\_formula\_sum: C280 H192 B4.6 F18.4 N24 O40 P8  
     Atom count from the \_atom\_site data: C279.6 H190.8 B4.6 F18.4 N24 O39  
 CELLZ01\_ALERT\_1\_G Difference between formula and atom\_site contents detected.  
 CELLZ01\_ALERT\_1\_G ALERT: Large difference may be due to a  
     symmetry error - see SYMMG tests  
     From the CIF: \_cell\_formula\_units\_Z 2  
     From the CIF: \_chemical\_formula\_sum C280 H192 B4.60 F18.40 N24 O40 P8  
     TEST: Compare cell contents of formula and atom\_site data

| atom | Z*formula | cif sites | diff  |
|------|-----------|-----------|-------|
| C    | 560.00    | 559.20    | 0.80  |
| H    | 384.00    | 381.60    | 2.40  |
| B    | 9.20      | 9.20      | 0.00  |
| F    | 36.80     | 36.80     | -0.00 |
| N    | 48.00     | 48.00     | 0.00  |
| O    | 80.00     | 79.60     | 0.40  |
| P    | 16.00     | 16.00     | 0.00  |
| Pd   | 12.00     | 12.00     | 0.00  |
| S    | 16.00     | 15.60     | 0.40  |

|                   |                                                            |       |       |              |
|-------------------|------------------------------------------------------------|-------|-------|--------------|
| PLAT002_ALERT_2_G | Number of Distance or Angle Restraints on AtSite           |       | 385   | Note         |
| PLAT003_ALERT_2_G | Number of Uiso or U(i,j) Restrained non-H-Atoms            |       | 385   | Report       |
| PLAT041_ALERT_1_G | Calc. and Reported SumFormula Strings Differ               |       |       | Please Check |
|                   | Calc: C279.60 H190.80 B4.60 F18.40 N24 O39.80 P8 Pd6 S7.80 |       |       |              |
|                   | Rep.: C280 H192 B4.60 F18.40 N24 O40 P8 Pd6 S8             |       |       |              |
| PLAT072_ALERT_2_G | SHELXL First Parameter in WGHT Unusually Large             |       | 0.30  | Report       |
| PLAT172_ALERT_4_G | The CIF-Embedded .res File Contains DFIX Records           |       | 56    | Report       |
| PLAT173_ALERT_4_G | The CIF-Embedded .res File Contains DANG Records           |       | 84    | Report       |
| PLAT174_ALERT_4_G | The CIF-Embedded .res File Contains FLAT Records           |       | 18    | Report       |
| PLAT178_ALERT_4_G | The CIF-Embedded .res File Contains SIMU Records           |       | 1     | Report       |
| PLAT186_ALERT_4_G | The CIF-Embedded .res File Contains ISOR Records           |       | 2     | Report       |
| PLAT187_ALERT_4_G | The CIF-Embedded .res File Contains RIGU Records           |       | 1     | Report       |
| PLAT244_ALERT_4_G | Low MinorResAtom Ueq as Compared to Neighbours             |       | B1_10 | Check        |
| PLAT244_ALERT_4_G | Low MinorResAtom Ueq as Compared to Neighbours             |       | B1_11 | Check        |
| PLAT244_ALERT_4_G | Low MinorResAtom Ueq as Compared to Neighbours             |       | B1_14 | Check        |
| PLAT300_ALERT_4_G | Atom Site Occupancy of F2_12 Constrained at                |       | 0.8   | Check        |
| PLAT300_ALERT_4_G | Atom Site Occupancy of F3_12 Constrained at                |       | 0.8   | Check        |
| PLAT300_ALERT_4_G | Atom Site Occupancy of F4_12 Constrained at                |       | 0.8   | Check        |
| PLAT300_ALERT_4_G | Atom Site Occupancy of F5_12 Constrained at                |       | 0.8   | Check        |
| PLAT300_ALERT_4_G | Atom Site Occupancy of B1_12 Constrained at                |       | 0.8   | Check        |
| PLAT300_ALERT_4_G | Atom Site Occupancy of F2_13 Constrained at                |       | 0.8   | Check        |
| PLAT300_ALERT_4_G | Atom Site Occupancy of F3_13 Constrained at                |       | 0.8   | Check        |
| PLAT300_ALERT_4_G | Atom Site Occupancy of F4_13 Constrained at                |       | 0.8   | Check        |
| PLAT300_ALERT_4_G | Atom Site Occupancy of F5_13 Constrained at                |       | 0.8   | Check        |
| PLAT300_ALERT_4_G | Atom Site Occupancy of B1_13 Constrained at                |       | 0.8   | Check        |
| PLAT300_ALERT_4_G | Atom Site Occupancy of S2_19 Constrained at                |       | 0.8   | Check        |
| PLAT300_ALERT_4_G | Atom Site Occupancy of O1_19 Constrained at                |       | 0.8   | Check        |
| PLAT300_ALERT_4_G | Atom Site Occupancy of C3_19 Constrained at                |       | 0.8   | Check        |
| PLAT300_ALERT_4_G | Atom Site Occupancy of C4_19 Constrained at                |       | 0.8   | Check        |
| PLAT300_ALERT_4_G | Atom Site Occupancy of H3A_19 Constrained at               |       | 0.8   | Check        |
| PLAT300_ALERT_4_G | Atom Site Occupancy of H3B_19 Constrained at               |       | 0.8   | Check        |
| PLAT300_ALERT_4_G | Atom Site Occupancy of H3C_19 Constrained at               |       | 0.8   | Check        |
| PLAT300_ALERT_4_G | Atom Site Occupancy of H4A_19 Constrained at               |       | 0.8   | Check        |
| PLAT300_ALERT_4_G | Atom Site Occupancy of H4B_19 Constrained at               |       | 0.8   | Check        |
| PLAT300_ALERT_4_G | Atom Site Occupancy of H4C_19 Constrained at               |       | 0.8   | Check        |
| PLAT302_ALERT_4_G | Anion/Solvent/Minor-Residue Disorder (Resd 4)              |       | 100%  | Note         |
| PLAT302_ALERT_4_G | Anion/Solvent/Minor-Residue Disorder (Resd 5)              |       | 100%  | Note         |
| PLAT302_ALERT_4_G | Anion/Solvent/Minor-Residue Disorder (Resd 11)             |       | 100%  | Note         |
| PLAT432_ALERT_2_G | Short Inter X...Y Contact O29_3 ..C3_19 .                  |       | 2.88  | Ang.         |
|                   | x,y,z =                                                    | 1_555 |       | Check        |
| PLAT432_ALERT_2_G | Short Inter X...Y Contact O28_7 ..C4_19 .                  |       | 2.92  | Ang.         |
|                   | x,y,z =                                                    | 1_555 |       | Check        |
| PLAT432_ALERT_2_G | Short Inter X...Y Contact O29_8 ..C4_21 .                  |       | 2.76  | Ang.         |
|                   | x,y,z =                                                    | 1_555 |       | Check        |
| PLAT606_ALERT_4_G | Solvent Accessible VOID(S) in Crystal Structure            |       |       | ! Info       |
| PLAT790_ALERT_4_G | Centre of Gravity not Within Unit-Cell: Resd. #            |       | 3     | Note         |
|                   | B F4                                                       |       |       |              |
| PLAT790_ALERT_4_G | Centre of Gravity not Within Unit-Cell: Resd. #            |       | 4     | Note         |
|                   | B F4                                                       |       |       |              |
| PLAT790_ALERT_4_G | Centre of Gravity not Within Unit-Cell: Resd. #            |       | 5     | Note         |
|                   | B F4                                                       |       |       |              |
| PLAT790_ALERT_4_G | Centre of Gravity not Within Unit-Cell: Resd. #            |       | 6     | Note         |
|                   | B F4                                                       |       |       |              |
| PLAT794_ALERT_5_G | Tentative Bond Valency for Pd1_1 (II) .                    |       | 2.22  | Info         |
| PLAT794_ALERT_5_G | Tentative Bond Valency for Pd2_1 (II) .                    |       | 2.33  | Info         |
| PLAT794_ALERT_5_G | Tentative Bond Valency for Pd4_1 (II) .                    |       | 2.25  | Info         |

```

PLAT794_ALERT_5_G Tentative Bond Valency for Pd5_1      (II)      .      2.19 Info
PLAT794_ALERT_5_G Tentative Bond Valency for Pd6_1      (II)      .      2.23 Info
PLAT860_ALERT_3_G Number of Least-Squares Restraints ..... 7414 Note
PLAT869_ALERT_4_G ALERTS Related to the Use of SQUEEZE Suppressed ! Info
PLAT910_ALERT_3_G Missing FCF Reflection(s) Below Theta(Min) [Deg]= 0.84 Note
      0 1 0, 0 0 1,
PLAT933_ALERT_2_G Number of HKL-OMIT Records in Embedded .res File 24 Note
      6 0 0, -7 1 0, 4 2 0, 8 2 0, 13 2 0, -5 4 0,
      -3 4 0, 2 4 0, 1 6 0, 4 6 0, 3 12 0, -2 -9 1,
      0 -8 1, 1 -7 1, 0 -6 1, 1 -6 1, -1 -5 1, 4 -5 1,
      6 -5 1, -3 -4 1, 7 -3 1, -7 -1 1, -4 -1 1, -4 0 1,
PLAT969_ALERT_5_G The 'Henn et al.' R-Factor-gap value ..... 5.481 Note
      Predicted wR2: Based on SigI**2 9.56 or SHELX Weight 39.90
PLAT978_ALERT_2_G Number C-C Bonds with Positive Residual Density. 0 Info
PLAT994_ALERT_1_G SHELXL .ins Contains no or MERG 0 Instruction .. ! Note

```

- 
- 4 **ALERT level A** = Most likely a serious problem - resolve or explain  
4 **ALERT level B** = A potentially serious problem, consider carefully  
54 **ALERT level C** = Check. Ensure it is not caused by an omission or oversight  
59 **ALERT level G** = General information/check it is not something unexpected
- 5 ALERT type 1 CIF construction/syntax error, inconsistent or missing data  
55 ALERT type 2 Indicator that the structure model may be wrong or deficient  
9 ALERT type 3 Indicator that the structure quality may be low  
46 ALERT type 4 Improvement, methodology, query or suggestion  
6 ALERT type 5 Informative message, check
- 

It is advisable to attempt to resolve as many as possible of the alerts in all categories. Often the minor alerts point to easily fixed oversights, errors and omissions in your CIF or refinement strategy, so attention to these fine details can be worthwhile. It is up to the individual to critically assess their own results and, if necessary, seek expert advice.

---

**PLATON version of 15/01/2026; check.def file version of 02/01/2026**

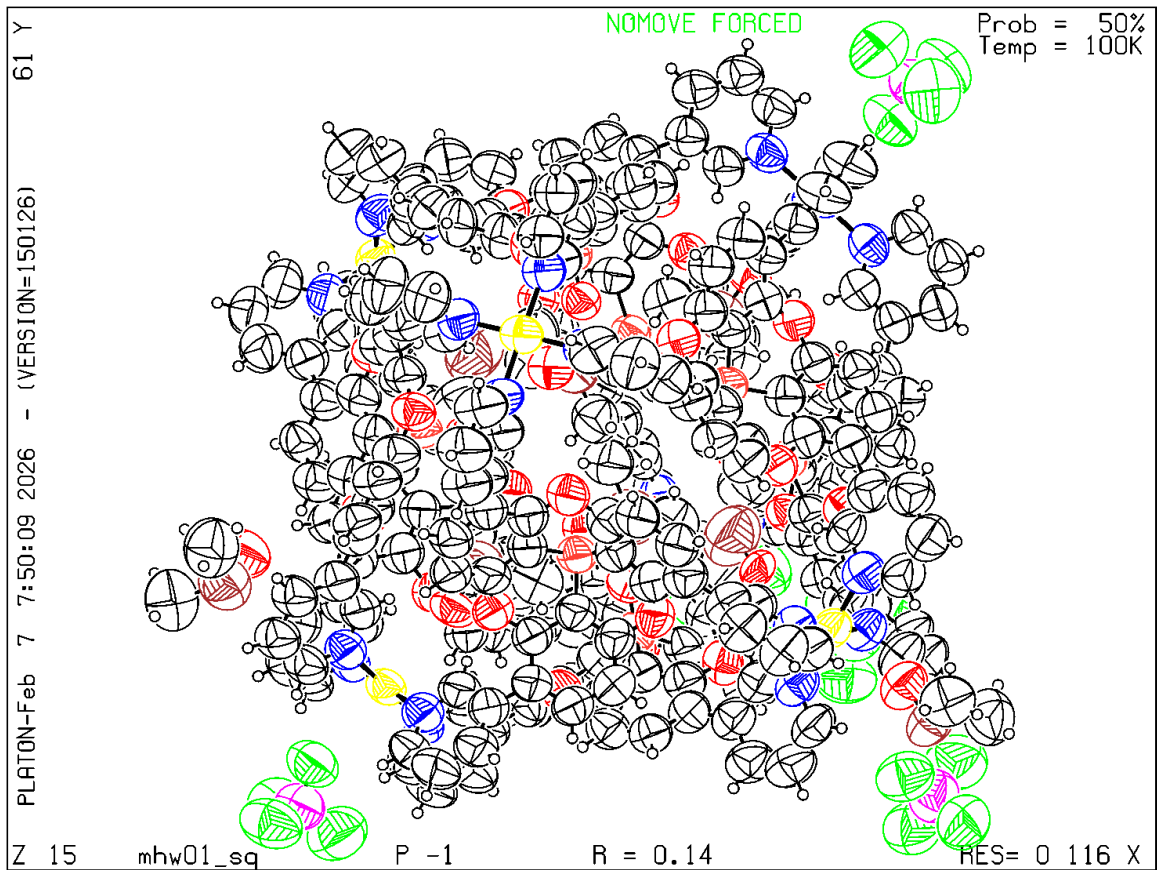

Supplement: Supplementary file 4 [file d09d0b26f2e292ad4efabb1b.pdf]
