# Supplementary material
Source: Research Square preprint supplement (doi:10.21203/rs.3.rs-9931798/v1)

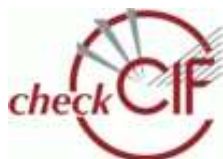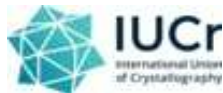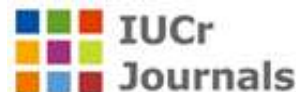

## checkCIF/PLATON report

Structure factors have been supplied for datablock(s) mhw02\_sq

THIS REPORT IS FOR GUIDANCE ONLY. IF USED AS PART OF A REVIEW PROCEDURE FOR PUBLICATION, IT SHOULD NOT REPLACE THE EXPERTISE OF AN EXPERIENCED CRYSTALLOGRAPHIC REFEREE.

No syntax errors found.      CIF dictionary      Interpreting this report

### Datablock: mhw02\_sq

---

Bond precision:      C-C = 0.0085 Å

Wavelength=1.34135

Cell:                      a=27.629(3)                      b=27.629(3)                      c=48.349(6)

                            alpha=90

                            beta=90

                            gamma=120

Temperature:              193 K

|                        | Calculated                                                         | Reported                                  |
|------------------------|--------------------------------------------------------------------|-------------------------------------------|
| Volume                 | 31963(8)                                                           | 31963(8)                                  |
| Space group            | P 31 2 1                                                           | P 31 2 1                                  |
| Hall group             | P 31 2"                                                            | P 31 2"                                   |
| Moiety formula         | C264 H144 N24 O32 P8 Pd6,<br>10.2(B F4), 6(C2 H3 N) [+<br>solvent] | ?                                         |
| Sum formula            | C276 H162 B10.20 F40.80 N30<br>O32 P8 Pd6 [+ solvent]              | C276 H162 B10.20 F40.80 N30<br>O32 P8 Pd6 |
| Mr                     | 6181.99                                                            | 6181.97                                   |
| Dx, g cm <sup>-3</sup> | 0.964                                                              | 0.963                                     |
| Z                      | 3                                                                  | 3                                         |
| Mu (mm <sup>-1</sup> ) | 1.904                                                              | 1.904                                     |
| F000                   | 9294.6                                                             | 9295.0                                    |
| F000'                  | 9324.94                                                            |                                           |
| h, k, lmax             | 33, 33, 58                                                         | 33, 33, 58                                |
| Nref                   | 39397[ 21005]                                                      | 39193                                     |
| Tmin, Tmax             | 0.717, 0.683                                                       | 0.578, 0.751                              |
| Tmin'                  | 0.651                                                              |                                           |



```

PLAT244_ALERT_4_G Low MinorResAtom Ueq as Compared to Neighbours      B1_11 Check
PLAT299_ALERT_4_G Atom Site Occupancy Constrained at .....          0.5 Check
      F2_10  F3_10  F4_10  F5_10  B1_10  H15A_13 H15B_13 H15C_13
      H3A_14  H3B_14  H3C_14
PLAT300_ALERT_4_G Atom Site Occupancy of F2_7          Constrained at      0.8 Check
PLAT300_ALERT_4_G Atom Site Occupancy of F3_7          Constrained at      0.8 Check
PLAT300_ALERT_4_G Atom Site Occupancy of F4_7          Constrained at      0.8 Check
PLAT300_ALERT_4_G Atom Site Occupancy of F5_7          Constrained at      0.8 Check
PLAT300_ALERT_4_G Atom Site Occupancy of B1_7          Constrained at      0.8 Check
PLAT300_ALERT_4_G Atom Site Occupancy of F2_9          Constrained at      0.8 Check
PLAT300_ALERT_4_G Atom Site Occupancy of F3_9          Constrained at      0.8 Check
PLAT300_ALERT_4_G Atom Site Occupancy of F4_9          Constrained at      0.8 Check
PLAT300_ALERT_4_G Atom Site Occupancy of F5_9          Constrained at      0.8 Check
PLAT300_ALERT_4_G Atom Site Occupancy of B1_9          Constrained at      0.8 Check
PLAT302_ALERT_4_G Anion/Solvent/Minor-Residue Disorder (Resd   3)    100% Note
PLAT302_ALERT_4_G Anion/Solvent/Minor-Residue Disorder (Resd   5)    100% Note
PLAT302_ALERT_4_G Anion/Solvent/Minor-Residue Disorder (Resd   6)    100% Note
PLAT304_ALERT_4_G Non-Integer Number of Atoms in ..... (Resd   6)    2.50 Check
PLAT606_ALERT_4_G Solvent Accessible VOID(S) in Crystal Structure      ! Info
PLAT790_ALERT_4_G Centre of Gravity not Within Unit-Cell: Resd. #      7 Note
      B F4
PLAT794_ALERT_5_G Tentative Bond Valency for Pd1_1      (II) .              2.27 Info
PLAT794_ALERT_5_G Tentative Bond Valency for Pd2_1      (II) .              2.24 Info
PLAT794_ALERT_5_G Tentative Bond Valency for Pd3_1      (II) .              2.23 Info
PLAT794_ALERT_5_G Tentative Bond Valency for Pd4_1      (II) .              2.22 Info
PLAT860_ALERT_3_G Number of Least-Squares Restraints .....          576 Note
PLAT869_ALERT_4_G ALERTS Related to the Use of SQUEEZE Suppressed      ! Info
PLAT912_ALERT_4_G Missing # of FCF Reflections Above STh/L= 0.600      64 Note
PLAT913_ALERT_3_G Missing # of Very Strong Reflections in FCF ....      2 Note
      -1  1  1,  0  1  1,
PLAT933_ALERT_2_G Number of HKL-OMIT Records in Embedded .res File      52 Note
      2  3  0,  0  4  0, -2  5  0,  2  5  0,  0  7  0,  0  3  1,
      -10  7  1, -3  2  2,  1  2  2, -2  3  2, -1  3  2, -3  3  3,
      0  2  4, -3  6  4,  0  1  5,  2  3  5, -1  1  9,  0  1  9,
      -2  7  9, -8  8  9, -7  7 10,  1  1 11, -1  2 11,  0  4 11,
      -3  3  1, -3 10  1,  0  8  3, -2  2  4, -5  5  4, -1  2  6,
      -6  6  7, -3  3  8, -4  4  8,  0 13  8,  2  5  9,  1  3 12,
      1  1 13, -5  5 18,  0  5 18,  0  3  0,  0  4  2,  2  2  3,
      -2  4  3,  0  5  4,  1  3 11, -3  4 11, -1  4 12, -1  3  0,
      -1  2  5,  0  2 12,
      ( 2 More NOT listed: see .ckf listing file)
PLAT969_ALERT_5_G The 'Henn et al.' R-Factor-gap value .....          4.004 Note
      Predicted wR2: Based on SigI**2 2.99 or SHELX Weight 11.74
PLAT978_ALERT_2_G Number C-C Bonds with Positive Residual Density.      0 Info
PLAT994_ALERT_1_G SHELXL .ins Contains no or MERG 0 Instruction ..      ! Note

```

- 
- 0 **ALERT level A** = Most likely a serious problem - resolve or explain  
0 **ALERT level B** = A potentially serious problem, consider carefully  
17 **ALERT level C** = Check. Ensure it is not caused by an omission or oversight  
41 **ALERT level G** = General information/check it is not something unexpected
- 2 ALERT type 1 CIF construction/syntax error, inconsistent or missing data  
18 ALERT type 2 Indicator that the structure model may be wrong or deficient  
4 ALERT type 3 Indicator that the structure quality may be low  
29 ALERT type 4 Improvement, methodology, query or suggestion  
5 ALERT type 5 Informative message, check

---

It is advisable to attempt to resolve as many as possible of the alerts in all categories. Often the minor alerts point to easily fixed oversights, errors and omissions in your CIF or refinement strategy, so attention to these fine details can be worthwhile. It is up to the individual to critically assess their own results and, if necessary, seek expert advice.

---

**PLATON version of 15/01/2026; check.def file version of 02/01/2026**

Datablock mhw02\_sq - ellipsoid plot

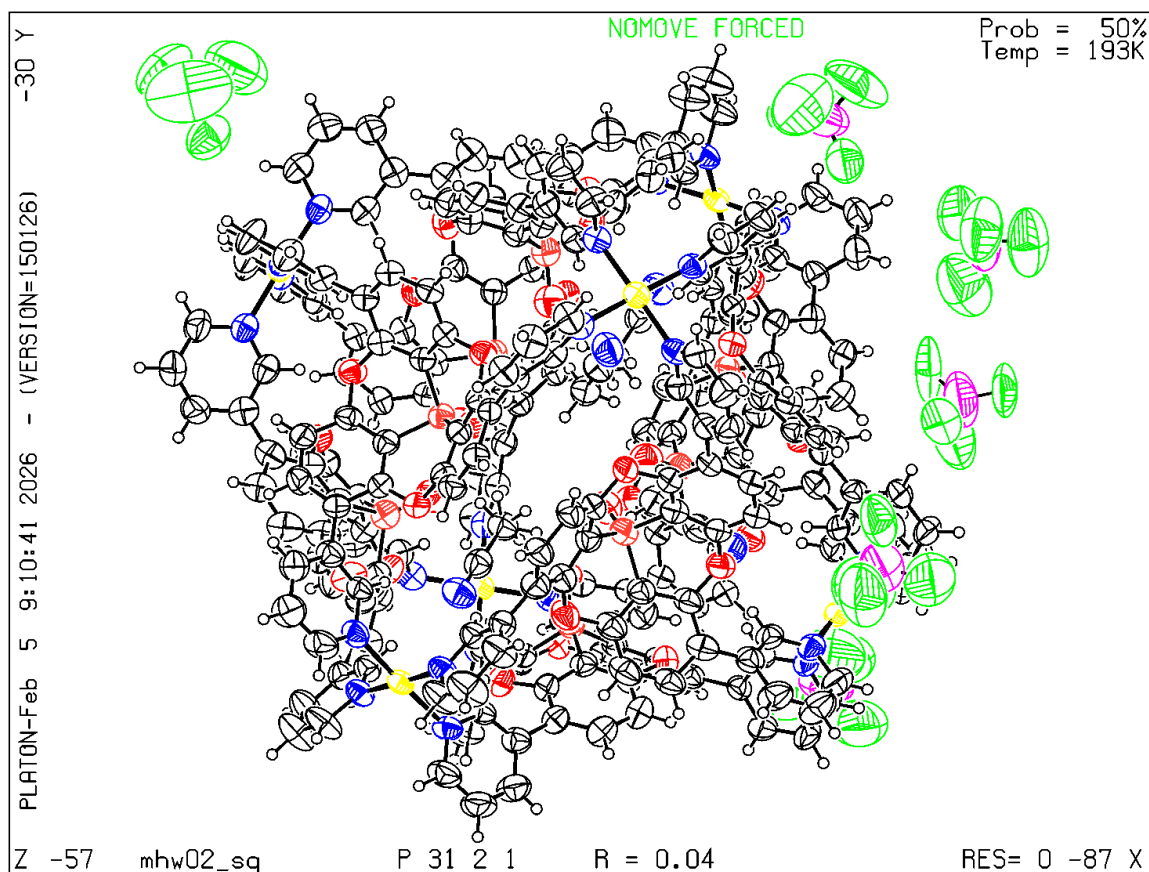

Supplement: Supplementary file 5 [file f8ee91e276aabd3477597fe0.pdf]
