# Supplementary material
Source: Research Square preprint supplement (doi:10.21203/rs.3.rs-9931798/v1)
Supplement: Supplementary file 1 [file 349e027eefcf5c4a13e660e1.pdf]

# Interligand Interactions Control Narcissistic Chiral Self-Sorting in the Self-Assembly of Pd<sub>6</sub>L<sub>8</sub> Octahedral Cages for Chiral Sensing

Minghui Wang<sup>1,†</sup>, Zuowei Sun<sup>1,†</sup>, Hui-Min Cai<sup>2,†</sup>, Jiaqi Su<sup>1</sup>, Wei-Jie Zhang<sup>3</sup>, Yi-Lin Pan<sup>3</sup>, Pingyao Gan<sup>1</sup>, Yapeng Mei<sup>1</sup>, Yanyi He<sup>1</sup>, Chunchun Zhang<sup>4</sup>, Haiyan Fu<sup>1</sup>, Ruixiang Li<sup>1</sup>, Xueli Zheng<sup>1</sup>, Kun Li<sup>1</sup>, Cheng-Yong Su<sup>3</sup>, Xiao-Qing Guo<sup>2,\*</sup>, Hua Chen<sup>1,\*</sup>, Kai Wu<sup>3,\*</sup>, Qing-Fu Sun<sup>2,\*</sup> & Weichao Xue<sup>1,\*</sup>

<sup>1</sup>Key Laboratory of Green Chemistry & Technology of Ministry of Education, College of Chemistry, Sichuan University, Chengdu 610064, Sichuan, China

<sup>2</sup>State Key Laboratory of Structural Chemistry, Fujian Institute of Research on the Structure of Matter, Chinese Academy of Sciences, Fuzhou 350002, Fujian, China

<sup>3</sup>Lehn Institute of Functional Materials, IGCME, GBRCE for Functional Molecular Engineering, MOE Key Laboratory of Bioinorganic and Synthetic Chemistry, School of Chemistry, Sun Yat-Sen University, Guangzhou 510006, Guangdong, China

<sup>4</sup>Analytical and Testing Center, Sichuan University, Chengdu 610064, Sichuan, China

Email: weichaoxue@scu.edu.cn; qfsun@fjirsm.ac.cn; wukai9@mail.sysu.edu.cn; scuhchen@scu.edu.cn; guoxiaoqing@fjirsm.ac.cn

## Supplementary Information

### Table of Contents

|     |                                                                                                                                            |     |
|-----|--------------------------------------------------------------------------------------------------------------------------------------------|-----|
| 1   | General Information .....                                                                                                                  | S3  |
| 2   | Synthesis and Characterization of Ligands.....                                                                                             | S4  |
| 3   | Chiral Separation of the Ligand <b>L</b> by HPLC.....                                                                                      | S10 |
| 4   | Self-Assembly and Characterization of Pd <sub>6</sub> L <sub>8</sub> Cages.....                                                            | S12 |
| 5   | Host-Guest Properties of Pd <sub>6</sub> L <sub>8</sub> Cages .....                                                                        | S23 |
| 5.1 | Host-Guest Interaction of 6DMSO@Pd <sub>6</sub> L <sup>P</sup> <sub>8</sub> with ( <i>R</i> )- <b>G1</b> and ( <i>S</i> )- <b>G1</b> ..... | S25 |
| 5.2 | Host-Guest Interaction of 6DMSO@Pd <sub>6</sub> L <sup>M</sup> <sub>8</sub> with ( <i>R</i> )- <b>G1</b> and ( <i>S</i> )- <b>G1</b> ..... | S30 |
| 5.3 | Host-Guest Interaction of 6DMSO@Pd <sub>6</sub> L <sup>P</sup> <sub>8</sub> with ( <i>R</i> )- <b>G2</b> and ( <i>S</i> )- <b>G2</b> ..... | S35 |
| 5.4 | Host-Guest Interaction of 6DMSO@Pd <sub>6</sub> L <sup>M</sup> <sub>8</sub> with ( <i>R</i> )- <b>G2</b> and ( <i>S</i> )- <b>G2</b> ..... | S39 |
| 5.5 | NMR and Fluorescence Sensing of Guests by Hosts .....                                                                                      | S46 |
| 6   | Volume Calculations .....                                                                                                                  | S51 |
| 7   | Possible Stereoisomers Analysis .....                                                                                                      | S52 |
| 8   | Computational Studies .....                                                                                                                | S54 |
| 9   | X-Ray Crystallography .....                                                                                                                | S67 |
| 10  | References.....                                                                                                                            | S74 |

## 1 General Information

Unless otherwise specified, all reagents were purchased from commercial sources and used as received. Precursor **S1** and **S3** were prepared according to reported procedures, respectively.<sup>1,2</sup> Self-assembly reactions were performed in CD<sub>3</sub>CN, CD<sub>3</sub>SOCD<sub>3</sub> or DMSO.

NMR spectra were recorded using the following NMR spectrometers: Bruker Avance 400 MHz (<sup>1</sup>H, <sup>13</sup>C, <sup>31</sup>P, <sup>1</sup>H-DOSY, and 2D NMR). Chemical shifts of the NMR spectra are reported relative to CDCl<sub>3</sub> (<sup>1</sup>H NMR:  $\delta$  = 7.26 ppm, <sup>13</sup>C NMR:  $\delta$  = 77.0 ppm), CD<sub>3</sub>CN (<sup>1</sup>H NMR:  $\delta$  = 1.94 ppm, <sup>13</sup>C NMR:  $\delta$  = 118.3 ppm), and CD<sub>3</sub>SOCD<sub>3</sub> (<sup>1</sup>H NMR:  $\delta$  = 2.50 ppm, <sup>13</sup>C NMR:  $\delta$  = 39.5 ppm). Data for <sup>1</sup>H NMR spectra were reported as follows: chemical shift (ppm), peak shape (s = singlet, d = doublet, t = triplet, m = multiplet, br = broad signal), coupling constant (Hz), and integration. Data for <sup>13</sup>C and <sup>31</sup>P NMR are reported in terms of chemical shift (ppm). Data for <sup>13</sup>C NMR are reported with chemical shift (ppm) values referenced to the residual solvent peak; data for <sup>31</sup>P NMR are reported with chemical shift (ppm) values as observed.

UV-vis measurements were employed to fine-tune the solution concentration for subsequent CD measurements, and were performed on a Thermo Scientific Genesys 180 UV-vis spectrometer with a 10 mm path-length cuvette at 298 K. Circular Dichroism was performed on an Applied-Photophysics Chirascan CD spectrometer using a 10 mm path-length cuvette. Experiments were recorded at 298 K. Measurements were background subtracted from blank solvent in an identical cuvette. The sample concentrations were adjusted to maintain a HV below 800 V. The fluorescence spectra were recorded on a Horiba Scientific Fluorolog-3 spectrofluorometer at 298 K.

Chiral HPLC separations were performed using a Shimadzu LC-20AT instrument. High resolution electrospray ionization mass spectra (HR-ESI-MS) were recorded on a Waters SYNAPT XS instrument. X-ray crystallographic analyses were performed on a Bruker D8 VENTURE Metaljet diffractometer.

## 2 Synthesis and Characterization of Ligands

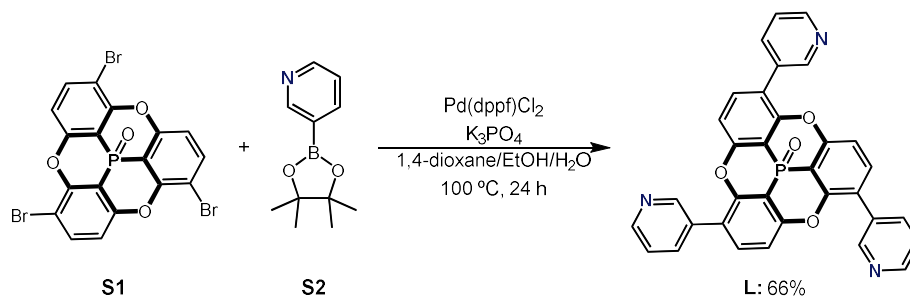

To a solution of *rac*-tribromophosphangulene (**S1**, 556.9 mg, 1.0 mmol, 1.0 equiv) and 3-pyridineboronic acid pinacol ester (**S2**, 491.6 mg, 4.0 mmol, 4.0 equiv) in a mixed solvent of 1,4-dioxane (28 mL), EtOH (8 mL) and H<sub>2</sub>O (4 mL), was added Pd(dppf)Cl<sub>2</sub> (219.5 mg, 0.3 mmol, 0.3 equiv) and K<sub>3</sub>PO<sub>4</sub> (1.06 g, 5.0 mmol, 5.0 equiv). The reaction mixture was refluxed at 100 °C for 24 h under nitrogen. After cooling down to room temperature, CH<sub>2</sub>Cl<sub>2</sub> (100 mL) was added, and the mixture was then filtered through Celite. After evaporation of the solvents under reduced pressure, the crude solid was purified by silica gel column chromatography (CH<sub>2</sub>Cl<sub>2</sub>/MeOH = 20/1) to afford **L** as a yellow solid (365.6 mg, 66%).

**<sup>1</sup>H NMR** (400 MHz, CDCl<sub>3</sub>): δ 8.81 (d, *J* = 1.6 Hz, 3H), 8.68 (dd, *J* = 4.8, 1.6 Hz, 3H), 7.95 (d, *J* = 7.9 Hz, 3H), 7.56 (d, *J* = 8.6 Hz, 3H), 7.47 (dd, *J* = 7.9, 4.8 Hz, 3H), 7.22 (dd, *J*<sub>H-H</sub> = 8.6, *J*<sub>H-P</sub> = 4.9 Hz, 3H). **<sup>13</sup>C NMR** (100 MHz, CDCl<sub>3</sub>): δ 159.6, 156.2, 150.0, 149.4, 136.8, 134.6, 131.1, 126.1 (d, *J*<sub>C-P</sub> = 5.4 Hz), 123.6, 116.0 (d, *J*<sub>C-P</sub> = 5.5 Hz), 110.4 (d, *J*<sub>C-P</sub> = 106.7 Hz). **<sup>31</sup>P NMR** (162 MHz, CDCl<sub>3</sub>): δ -48.65. **HRMS** (ESI): calculated for C<sub>33</sub>H<sub>19</sub>N<sub>3</sub>O<sub>4</sub>P<sup>+</sup> [M+H]<sup>+</sup>: 552.1108; found: 552.1105.

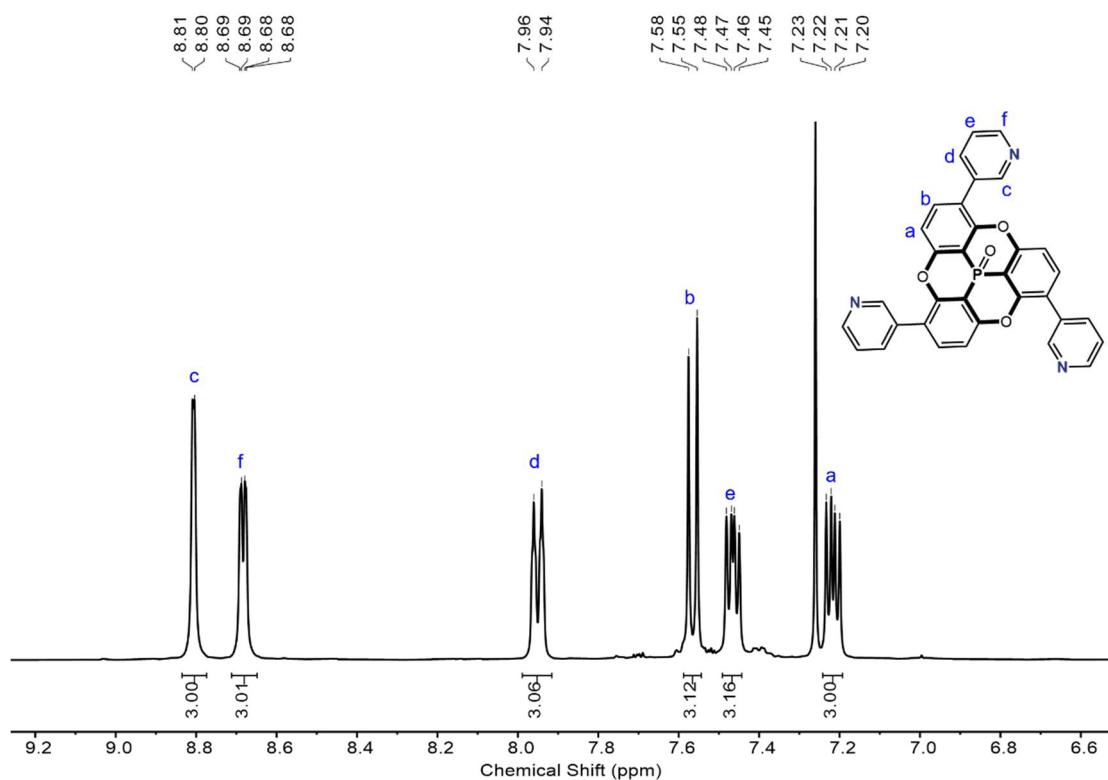

**Figure S1.** <sup>1</sup>H NMR spectrum of ligand L (400 MHz, CDCl<sub>3</sub>, 25 °C).

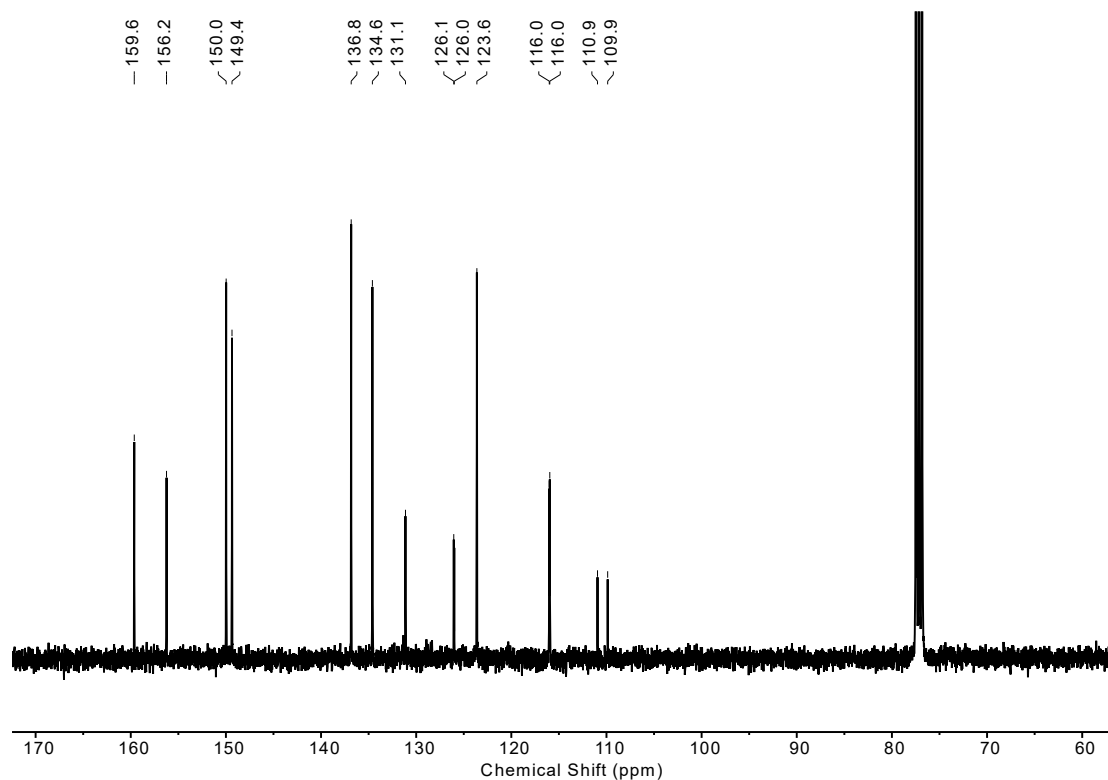

**Figure S2.** <sup>13</sup>C NMR spectrum of ligand L (100 MHz, CDCl<sub>3</sub>, 25 °C).

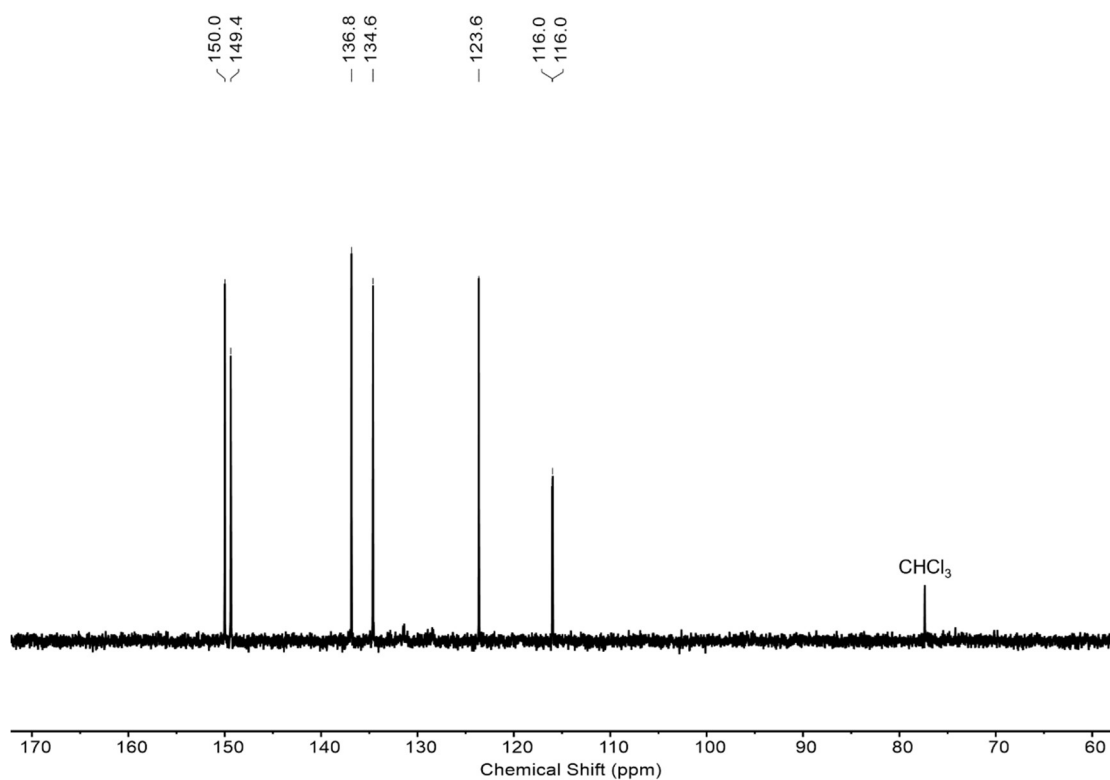

**Figure S3.**  $^{13}\text{C}$  DEPT-90 NMR spectrum of ligand L (100 MHz,  $\text{CDCl}_3$ , 25 °C).

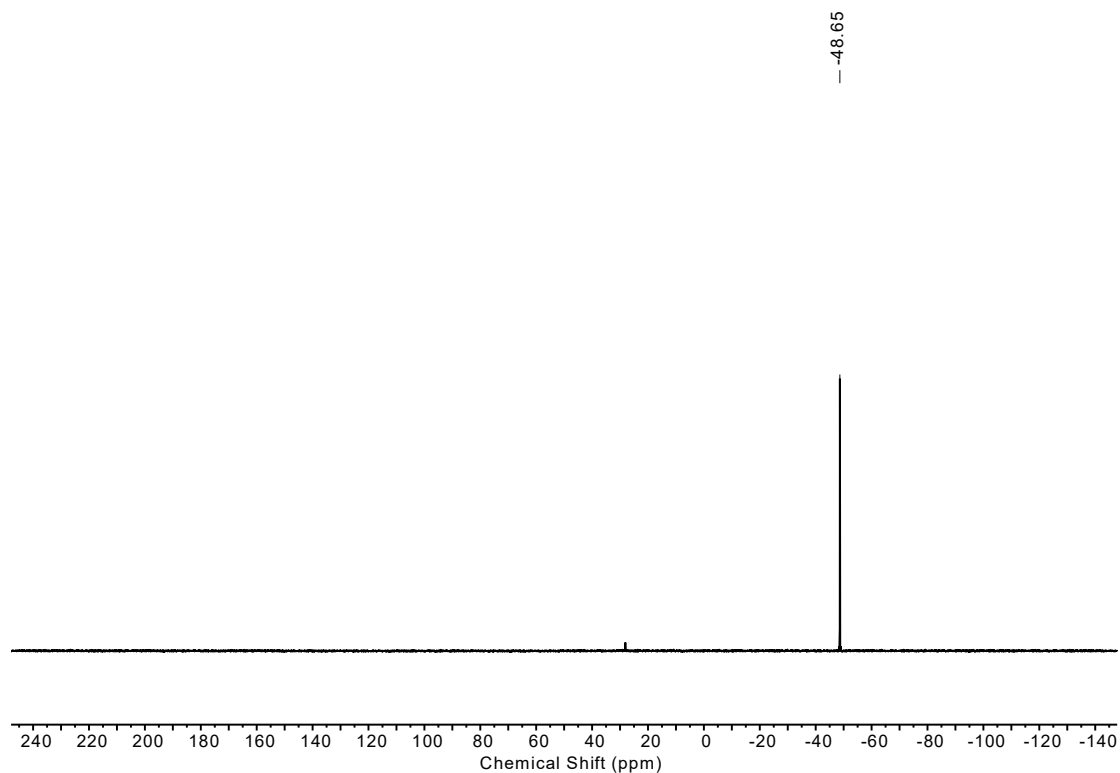

**Figure S4.**  $^{31}\text{P}$  NMR spectrum of ligand L (162 MHz,  $\text{CDCl}_3$ , 25 °C).

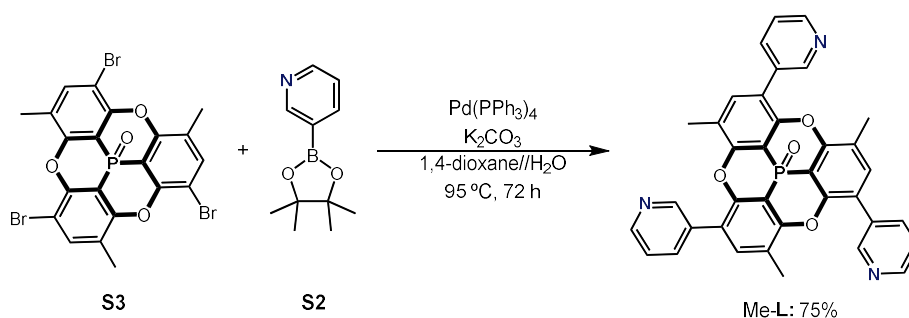

Compound **S3** (326 mg, 0.54 mmol, 1.0 equiv), 3-pyridineboronic acid pinacol ester (**S2**, 443 mg, 2.16 mmol, 4.0 equiv), Pd(PPh<sub>3</sub>)<sub>4</sub> (125 mg, 0.108 mmol, 0.2 equiv), and K<sub>2</sub>CO<sub>3</sub> (896 mg, 6.48 mmol, 12.0 equiv) were added to a mixture of 1,4-dioxane/H<sub>2</sub>O (v/v=4:1, 100 mL). The reaction mixture was degassed under nitrogen for 30 minutes and then heated at 95 °C for 72 hours under a nitrogen atmosphere. After cooling to room temperature, the solvent was removed under reduced pressure. The residue was dissolved in 100 mL of dichloromethane and washed with water (3×100 mL). The organic phase was dried over anhydrous sodium sulfate, filtered, and concentrated under reduced pressure. The crude product was purified by column chromatography (SiO<sub>2</sub>, DCM/MeOH = 20/1) to afford the ligand Me-L as a white solid (240 mg, 75% yield).

**<sup>1</sup>H NMR** (400 MHz, CDCl<sub>3</sub>): δ 8.79 (s, 3H), 8.66 (d, *J* = 4.8 Hz, 3H), 7.99 (d, *J* = 10.8 Hz, 3H), 7.48 – 7.41 (m, 3H), 7.34 (s, 3H), 2.07 (s, 9H). **<sup>13</sup>C NMR** (100 MHz, CDCl<sub>3</sub>): δ 157.7, 154.4, 149.9, 149.1, 136.9, 135.0, 131.2, 125.6 (d, *J*<sub>C-P</sub> = 5.4 Hz), 125.5 (d, *J*<sub>C-P</sub> = 5.4 Hz), 123.23, 110.1 (d, *J*<sub>C-P</sub> = 106.9 Hz), 14.89. **<sup>31</sup>P NMR** (162 MHz, CDCl<sub>3</sub>): δ -45.05.

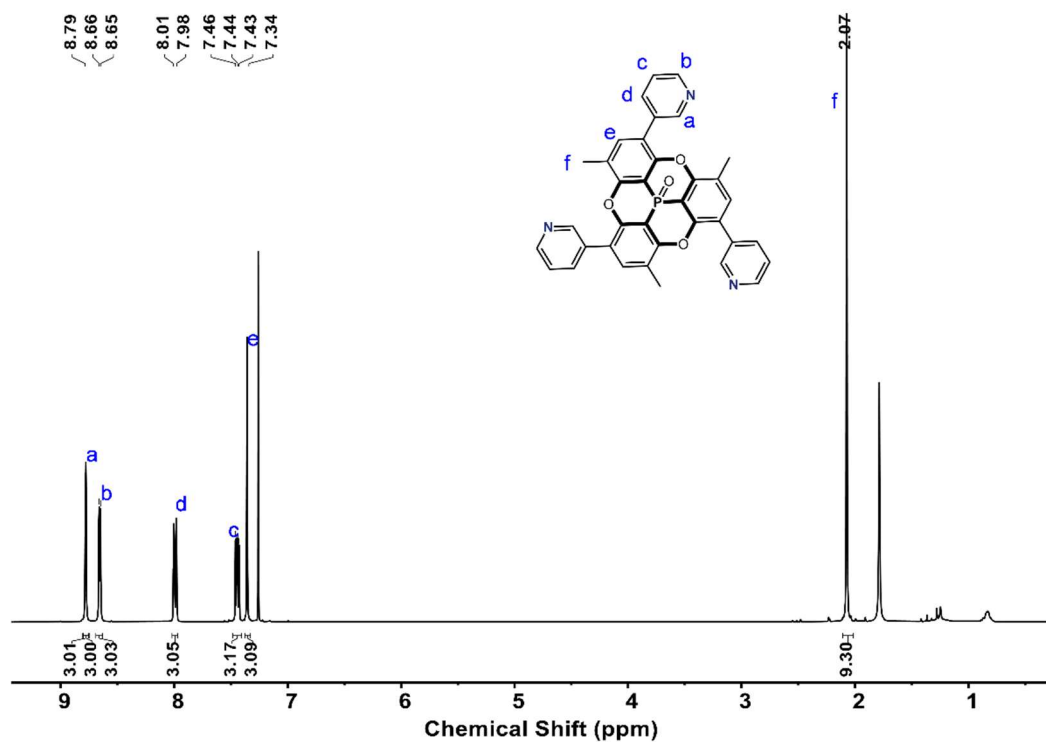

**Figure S5.**  $^1\text{H}$  NMR spectrum of ligand Me-L (400 MHz,  $\text{CDCl}_3$ , 25  $^\circ\text{C}$ ).

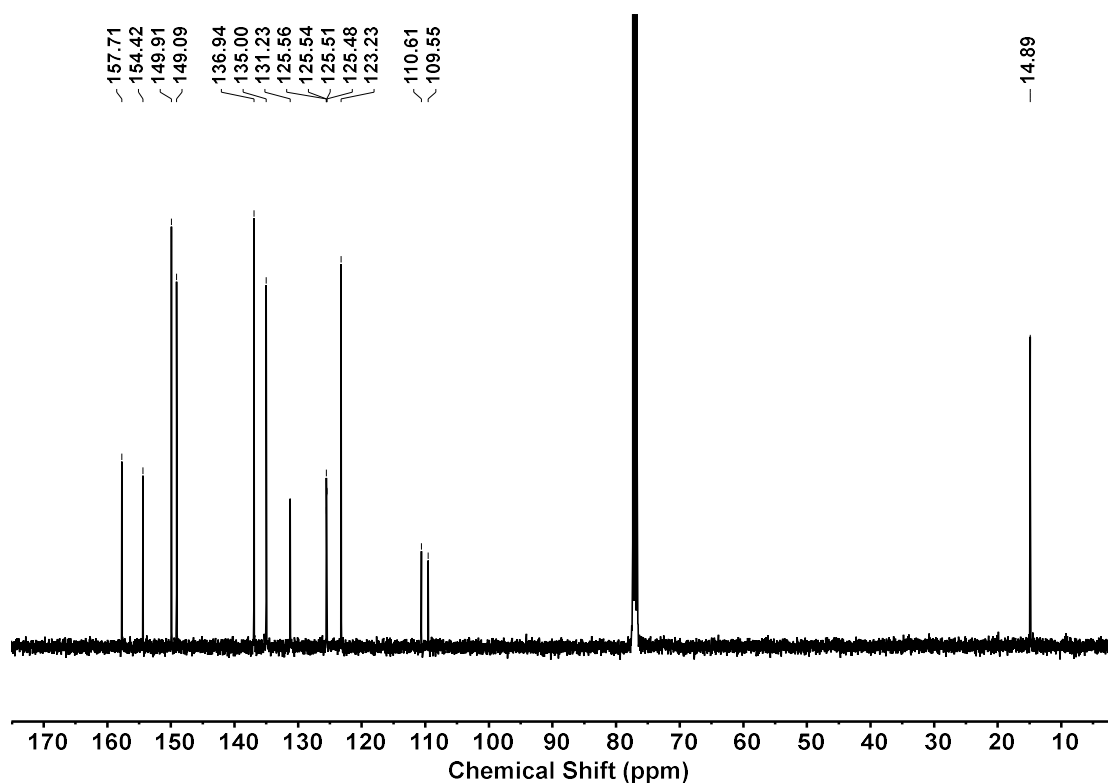

**Figure S6.**  $^{13}\text{C}$  NMR spectrum of ligand Me-L (100 MHz,  $\text{CDCl}_3$ , 25  $^\circ\text{C}$ ).

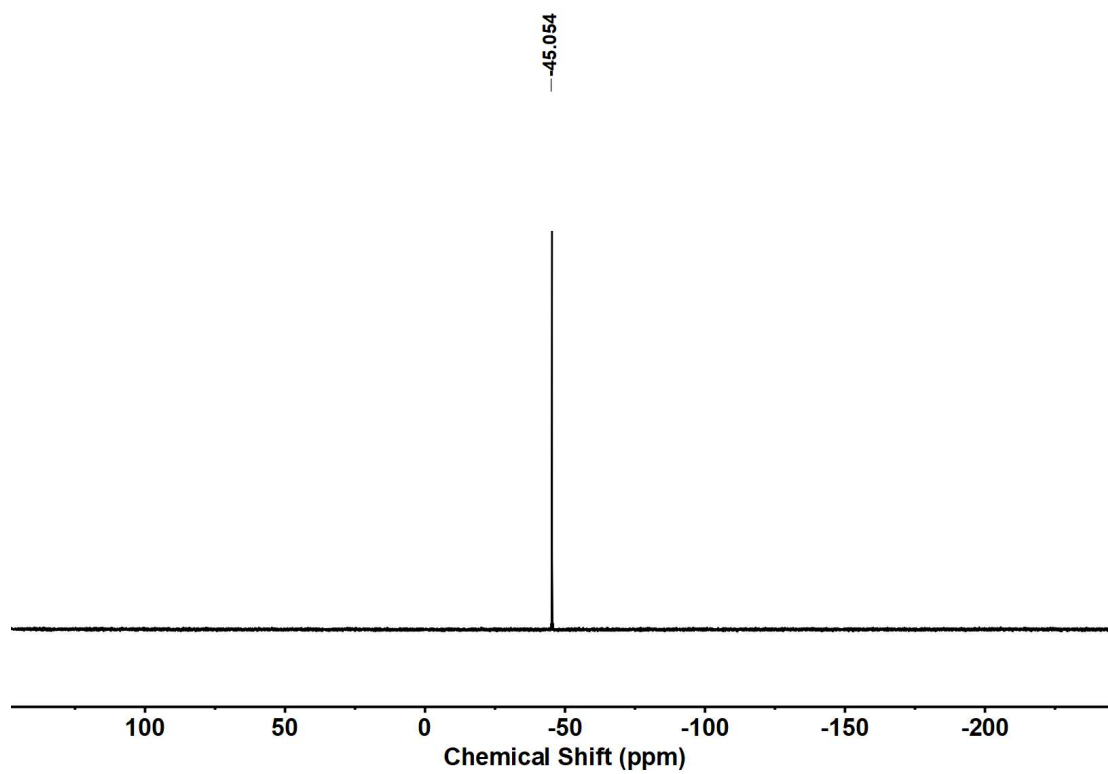

**Figure S7.**  $^{31}\text{P}$  NMR spectrum of ligand Me-L (162 MHz,  $\text{CDCl}_3$ , 25 °C).

### 3 Chiral Separation of the Ligand L by HPLC

The ligand **L** enantiomers (*P*/*M*) were separated by chiral HPLC (Shimadzu LC-20AT) with an eluent of dichloromethane/methanol (60/40) on a Chiralpak IN (0.46 cm I.D. × 25 cm L) column. The absorbance was set at 254 nm with a flow rate of 1 mL/min. Retention times: *P* enantiomer, **L<sup>P</sup>** (3.7 min); *M* enantiomer, **L<sup>M</sup>** (4.4 min).

Racemic mixture:

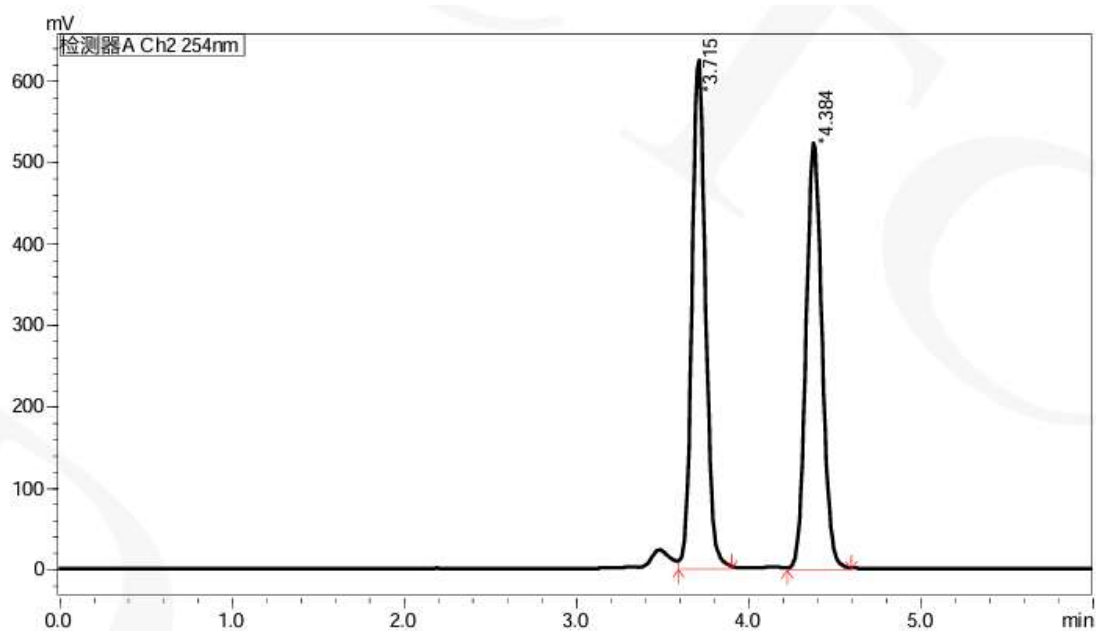

| Peak# | Ret. Time | Area    | Area%  |
|-------|-----------|---------|--------|
| 1     | 3.715     | 3406687 | 50.430 |
| 2     | 4.384     | 3348575 | 49.570 |

$L^P$ : ee > 99%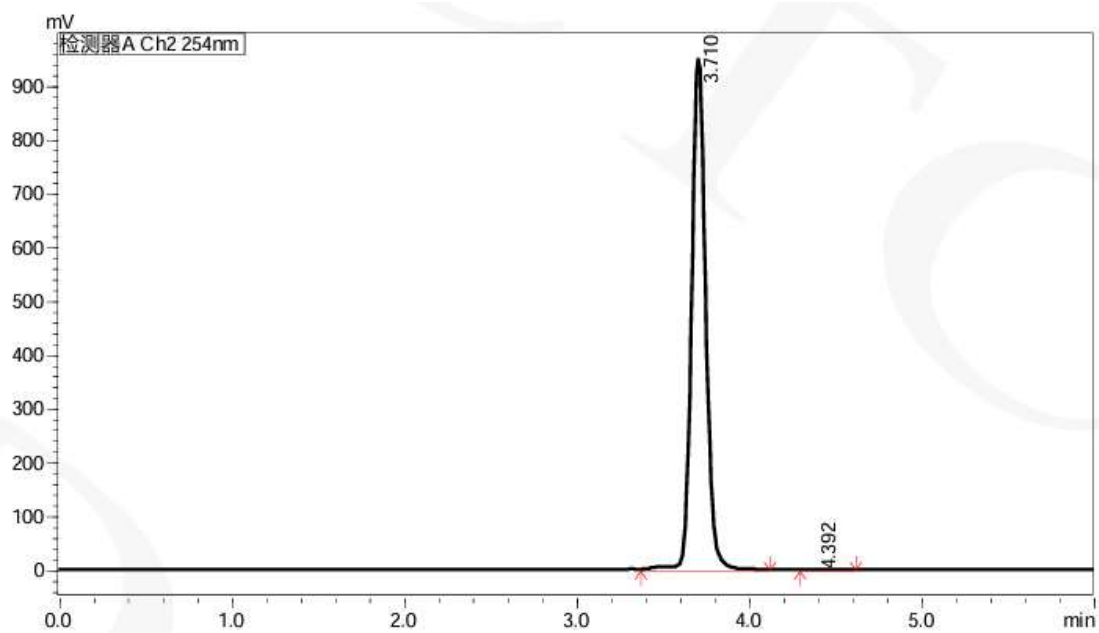

| Peak# | Ret. Time | Area    | Area%  |
|-------|-----------|---------|--------|
| 1     | 3.715     | 5373338 | 99.949 |
| 2     | 4.392     | 2764    | 0.051  |

 $L^M$ : ee > 99%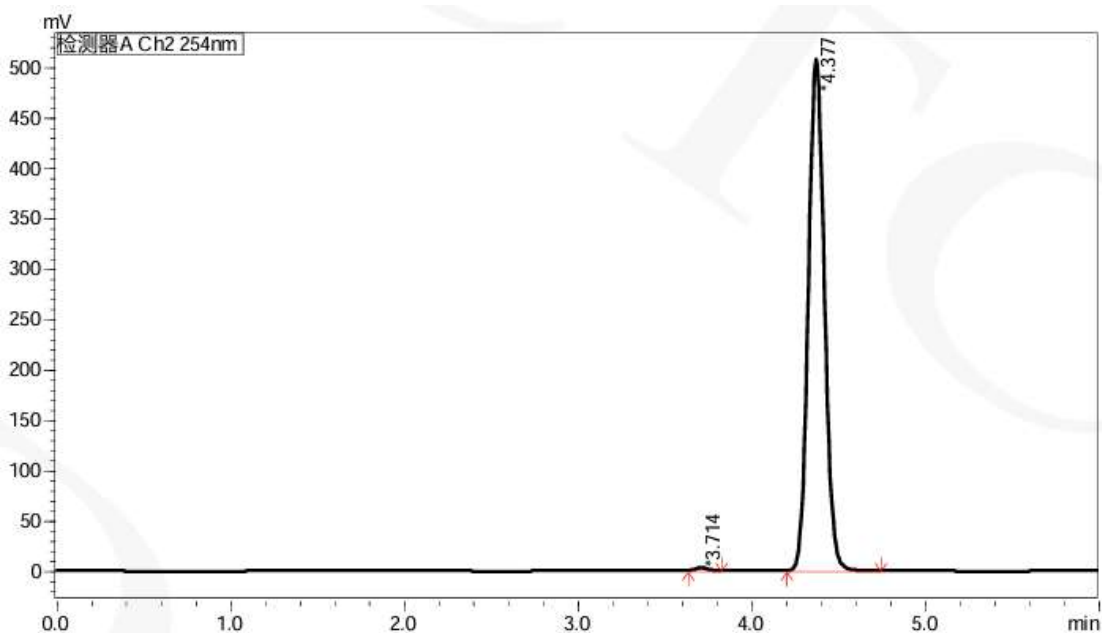

| Peak# | Ret. Time | Area    | Area%  |
|-------|-----------|---------|--------|
| 1     | 3.714     | 13857   | 0.424  |
| 2     | 4.377     | 3254485 | 99.576 |

## 4 Self-Assembly and Characterization of Pd<sub>6</sub>L<sub>8</sub> Cages

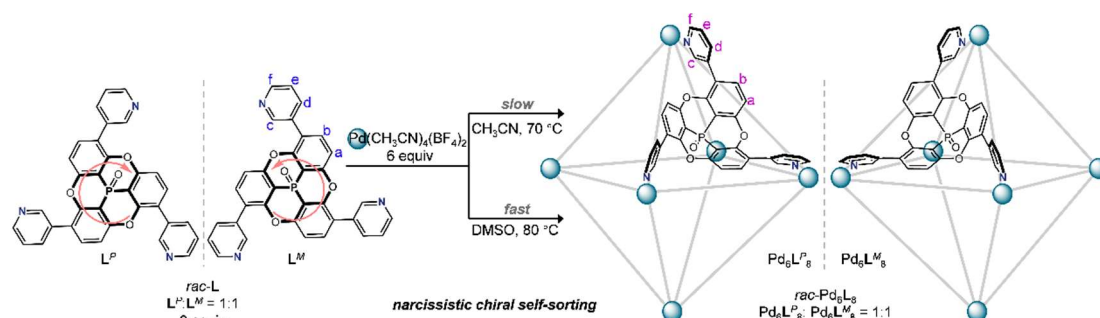

*Rac*-ligand **L** (44.1 mg, 0.08 mmol) and Pd(CH<sub>3</sub>CN)<sub>4</sub>(BF<sub>4</sub>)<sub>2</sub> (26.7 mg, 0.06 mmol) were combined in DMSO (2.5 mL) in a 5 mL tube. The reaction mixture was stirred at 80 °C overnight. The mixture was filtered, and excess ethyl acetate (40 mL) was then added. The precipitate was collected by centrifugation and washed with excess diethyl ether, affording 6DMSO@*rac*-Pd<sub>6</sub>L<sub>8</sub> cage as a gray solid. To remove the encapsulated DMSO molecules, 6DMSO@*rac*-Pd<sub>6</sub>L<sub>8</sub> was redissolved in CH<sub>3</sub>CN and heated at 70 °C for 2 h. The resulting solution was then treated with excess ethyl acetate (40 mL), and the precipitated solid was collected by centrifugation, followed by washing with diethyl ether, yielding the *rac*-Pd<sub>6</sub>L<sub>8</sub> cage as a yellow solid (47.5 mg, 78%). The enantiopure cages Pd<sub>6</sub>L<sup>*P*</sup><sub>8</sub> and Pd<sub>6</sub>L<sup>*M*</sup><sub>8</sub> were synthesized analogously to *rac*-Pd<sub>6</sub>L<sub>8</sub>, but using the first-eluted (*P*) or second-eluted (*M*) enantiomer of **L** in place of *rac*-**L**. Their <sup>1</sup>H NMR spectra were identical to that of *rac*-Pd<sub>6</sub>L<sub>8</sub>.

<sup>1</sup>H NMR (400 MHz, CD<sub>3</sub>CN): δ 10.01 (s, 24H), 9.51 (d, *J* = 5.6 Hz, 24H), 8.00 (d, *J* = 8.0 Hz, 24H), 7.84 (dd, *J* = 8.0, 5.6 Hz, 24H), 7.59 (d, *J* = 8.5 Hz, 24H), 6.53 (dd, *J*<sub>H-H</sub> = 8.5, *J*<sub>H-P</sub> = 4.5 Hz, 24H). <sup>13</sup>C NMR (100 MHz, CD<sub>3</sub>CN): δ 160.2, 156.8, 153.3, 151.2, 141.0, 137.3, 135.3, 128.8, 125.0 (d, *J*<sub>C-P</sub> = 5.2 Hz), 118.1, 111.7 (d, *J*<sub>C-P</sub> = 106.1 Hz). <sup>31</sup>P NMR (162 MHz, CD<sub>3</sub>CN): δ -41.56.

**HR-ESI-MS:** *m/z* = 459.9382 [6DMSO@Pd<sub>6</sub>L<sub>8</sub>]<sup>12+</sup>, 509.5689 [6DMSO@Pd<sub>6</sub>L<sub>8</sub>+BF<sub>4</sub>]<sup>11+</sup>, 569.3258 [6DMSO@Pd<sub>6</sub>L<sub>8</sub>+2BF<sub>4</sub>]<sup>10+</sup>, 642.1393 [6DMSO@Pd<sub>6</sub>L<sub>8</sub>+3BF<sub>4</sub>]<sup>9+</sup>, 733.2823 [6DMSO@Pd<sub>6</sub>L<sub>8</sub>+4BF<sub>4</sub>]<sup>8+</sup>, 850.3222 [6DMSO@Pd<sub>6</sub>L<sub>8</sub>+5BF<sub>4</sub>]<sup>7+</sup>, 1006.5421 [6DMSO@Pd<sub>6</sub>L<sub>8</sub>+6BF<sub>4</sub>]<sup>6+</sup>.

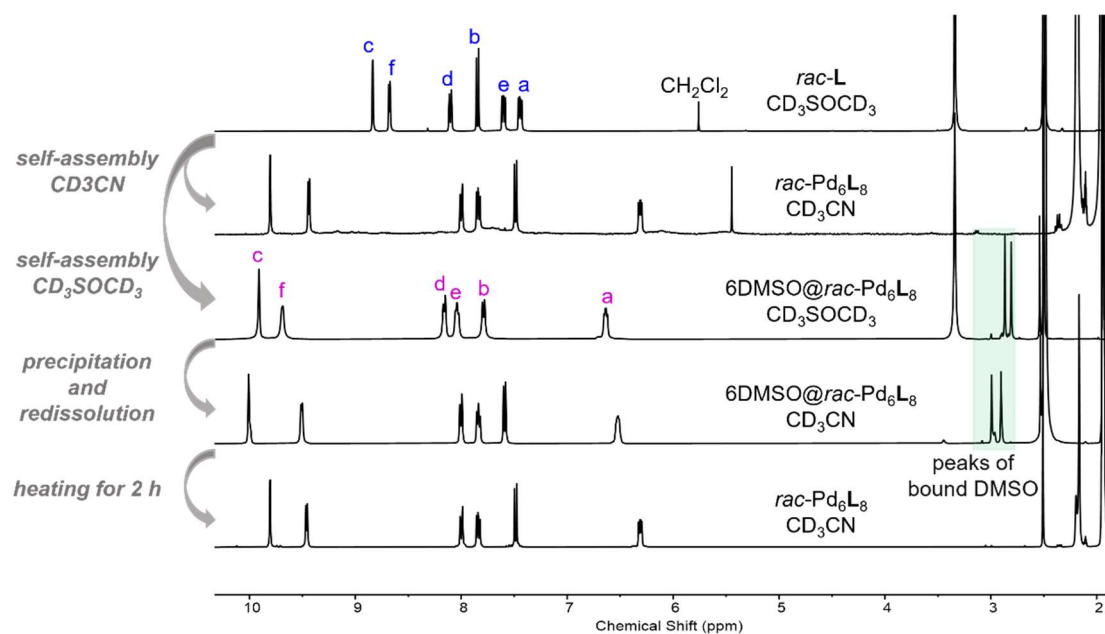

**Figure S8.**  $^1\text{H}$  NMR spectrum of ligand,  $6\text{DMSO}@rac\text{-Pd}_6\text{L}_8$ , and  $\text{Pd}_6\text{L}_8$  (400 MHz,  $\text{CD}_3\text{SOCD}_3$  or  $\text{CD}_3\text{CN}$ , 25 °C).

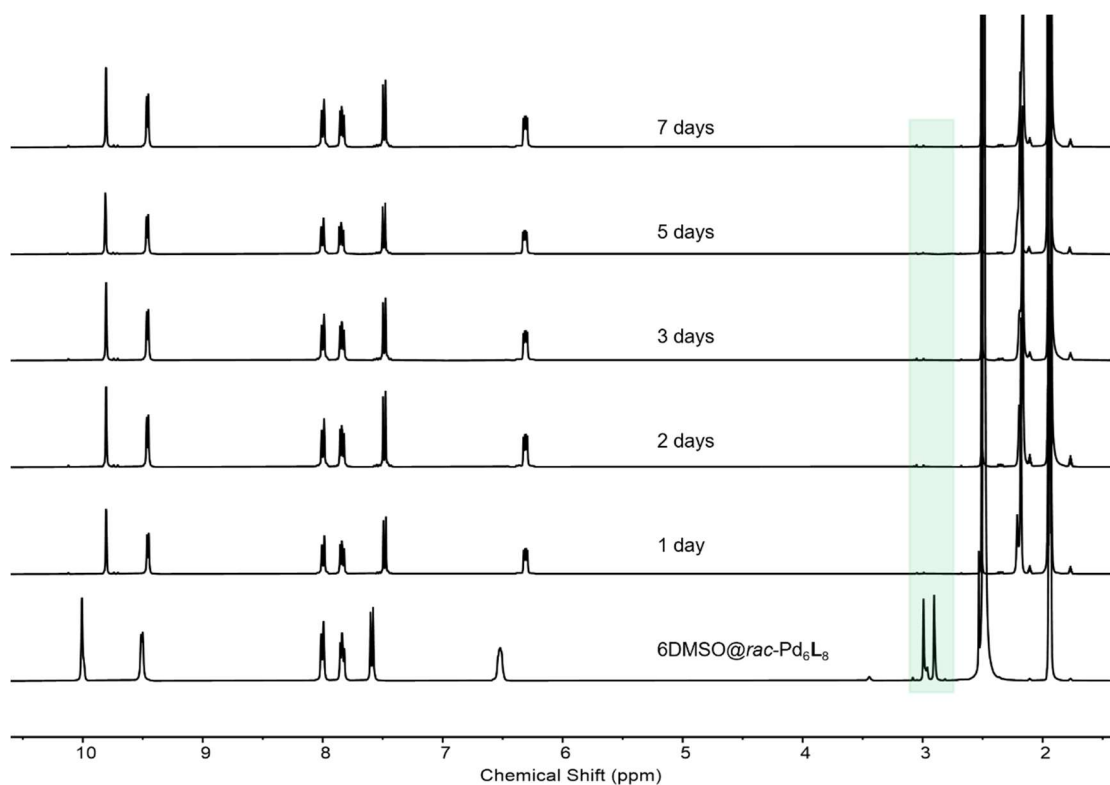

**Figure S9.**  $^1\text{H}$  NMR spectrum of cage  $6\text{DMSO}@rac\text{-Pd}_6\text{L}_8$  over time in acetonitrile, heating at 70 °C. (400 MHz,  $\text{CD}_3\text{CN}$ , 25 °C).



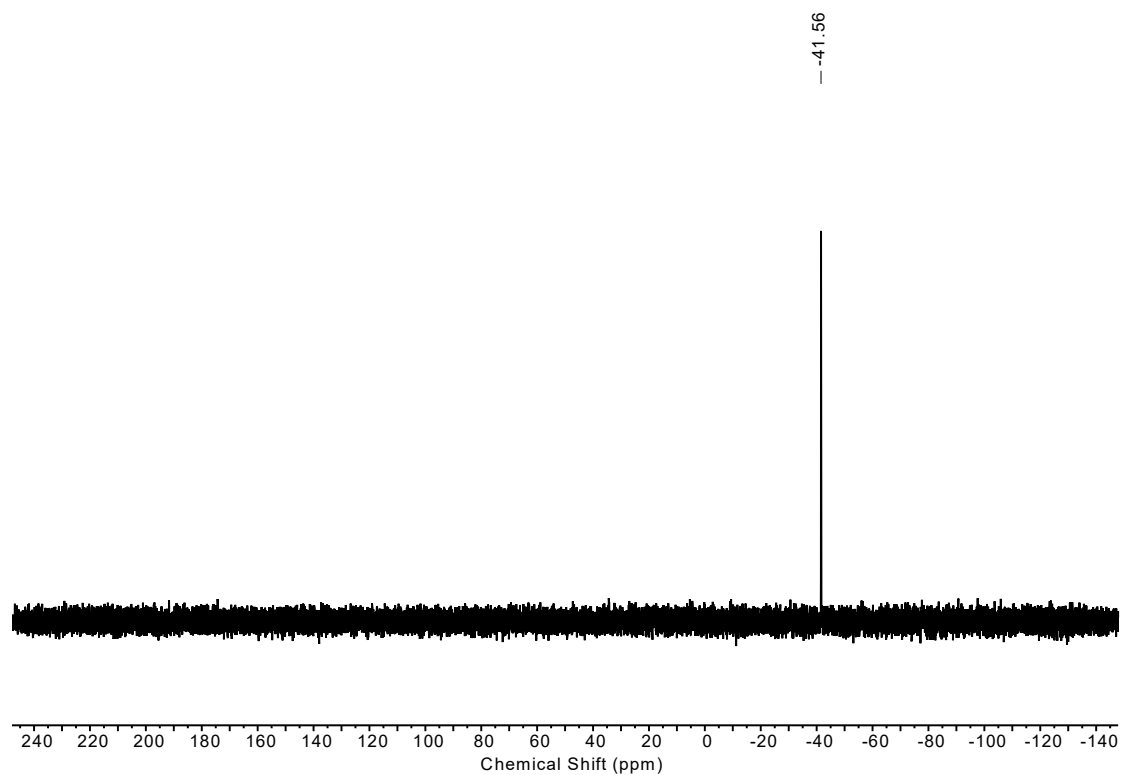

**Figure S12.**  $^{31}\text{P}$  NMR spectrum of 6DMSO@*rac*-Pd<sub>6</sub>L<sub>8</sub> (162 MHz, CD<sub>3</sub>CN, 25 °C).

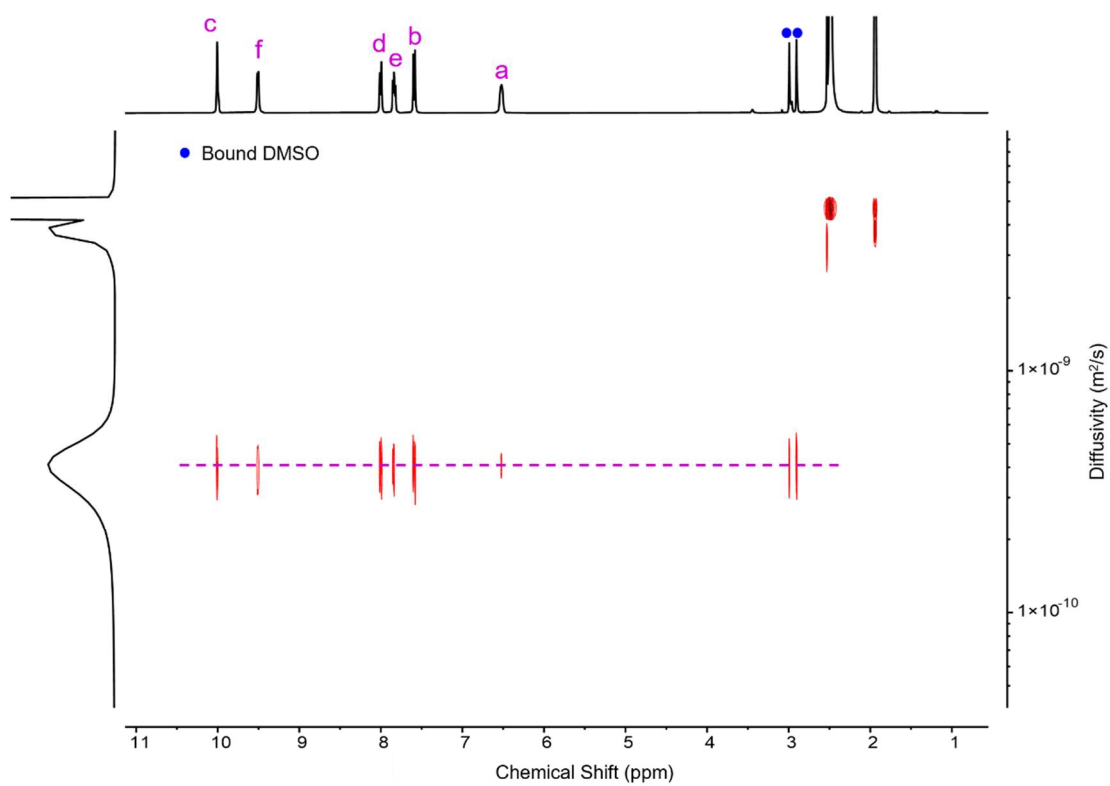

**Figure S13.**  $^1\text{H}$  DOSY spectrum of 6DMSO@*rac*-Pd<sub>6</sub>L<sub>8</sub> (400 MHz, CD<sub>3</sub>CN, 25 °C).

The diffusion coefficient was measured to be  $3.8 \times 10^{-10}$  m<sup>2</sup>/s.

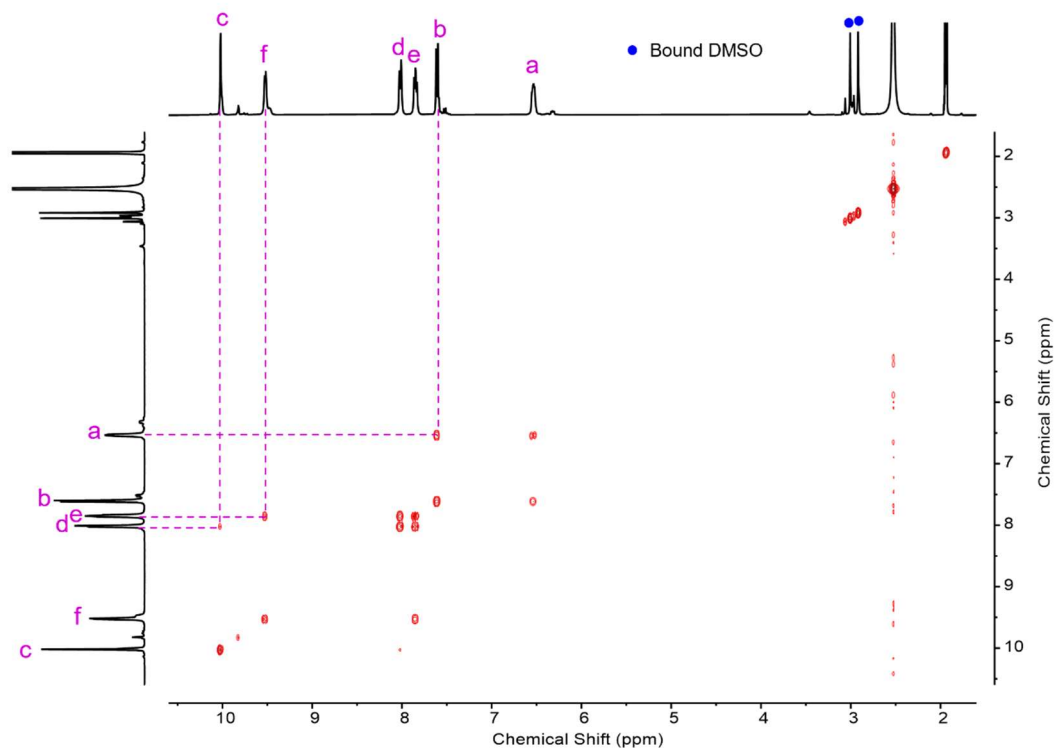

**Figure S14.** <sup>1</sup>H-<sup>1</sup>H COSY NMR spectrum of 6DMSO@*rac*-Pd<sub>6</sub>L<sub>8</sub> (400 MHz, CD<sub>3</sub>CN, 25 °C).

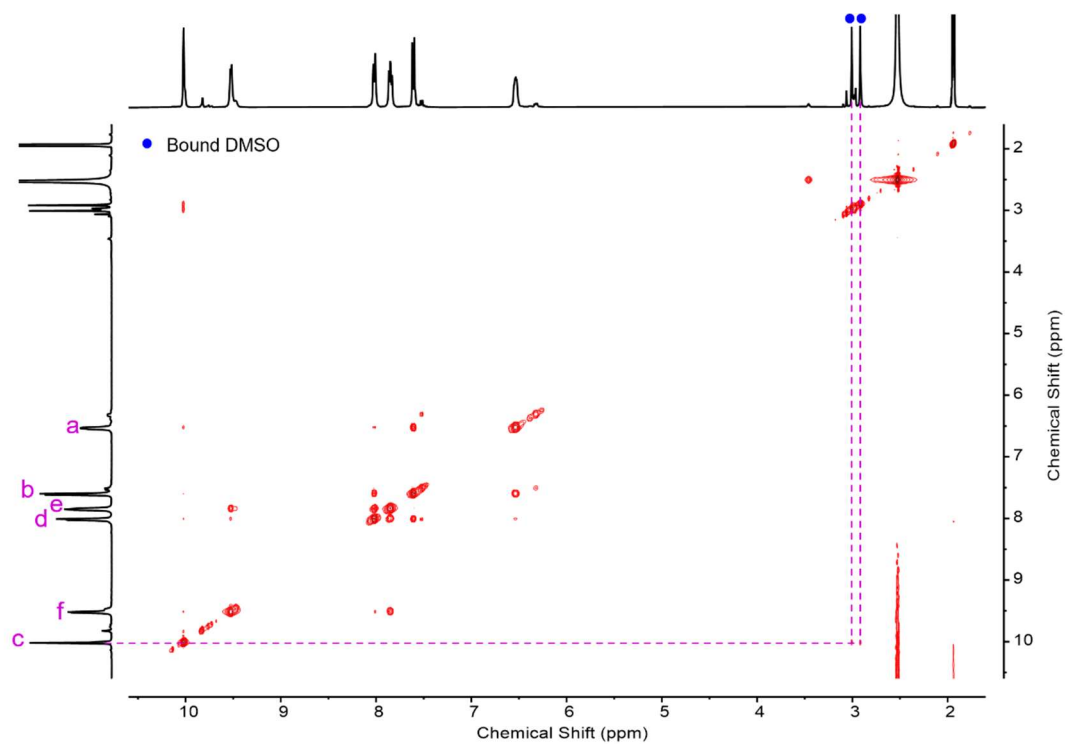

**Figure S15.** <sup>1</sup>H-<sup>1</sup>H NOESY NMR spectrum of 6DMSO@*rac*-Pd<sub>6</sub>L<sub>8</sub> (400 MHz, CD<sub>3</sub>CN, 25 °C).

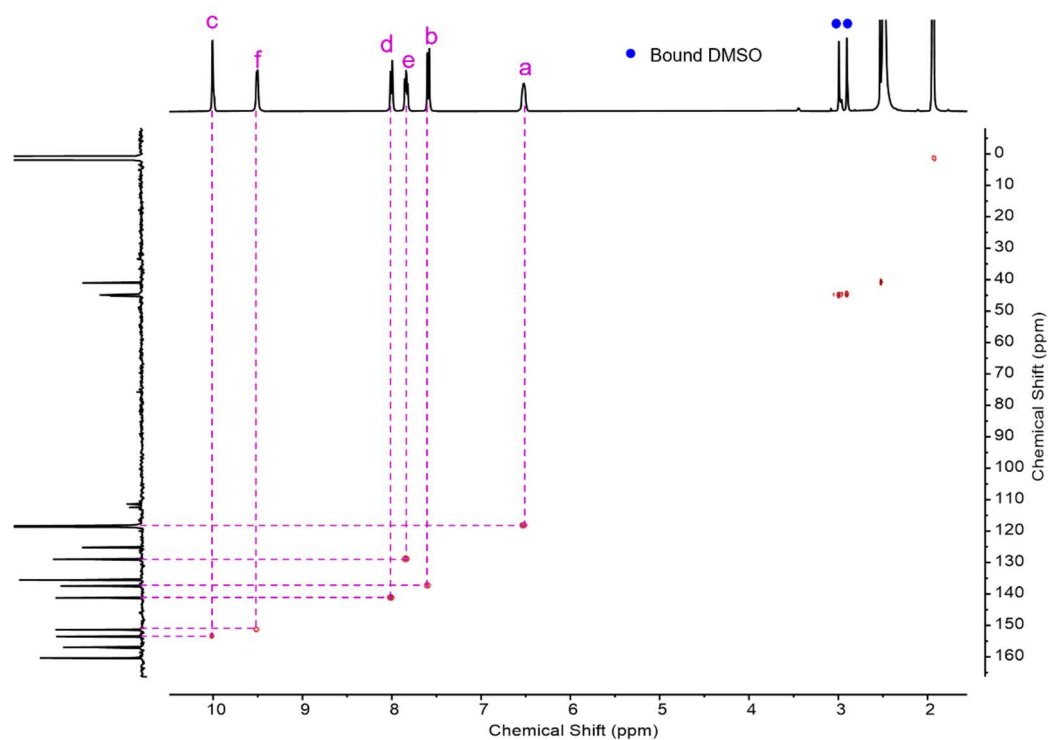

**Figure S16.**  $^1\text{H}$ - $^{13}\text{C}$  HSQC NMR spectrum of 6DMSO@*rac*-Pd<sub>6</sub>L<sub>8</sub> (400 MHz, CD<sub>3</sub>CN, 25 °C).

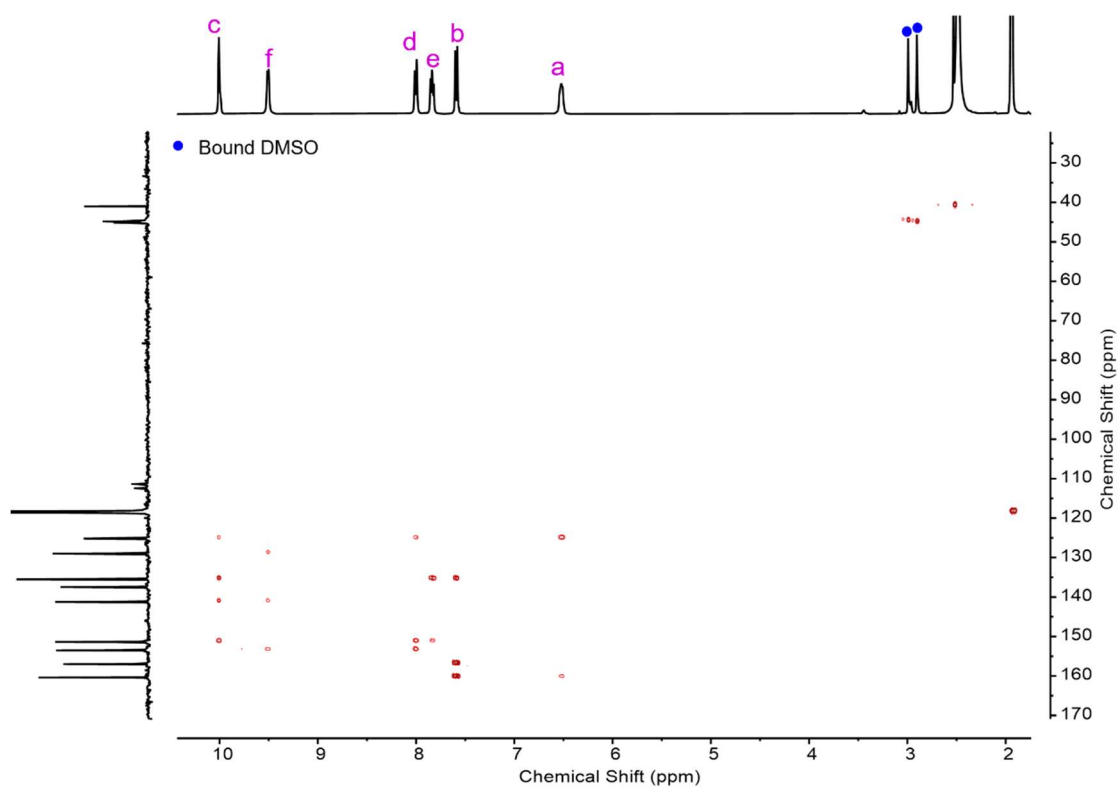

**Figure S17.**  $^1\text{H}$ - $^{13}\text{C}$  HMBC NMR spectrum of 6DMSO@*rac*-Pd<sub>6</sub>L<sub>8</sub> (400 MHz, CD<sub>3</sub>CN, 25 °C).

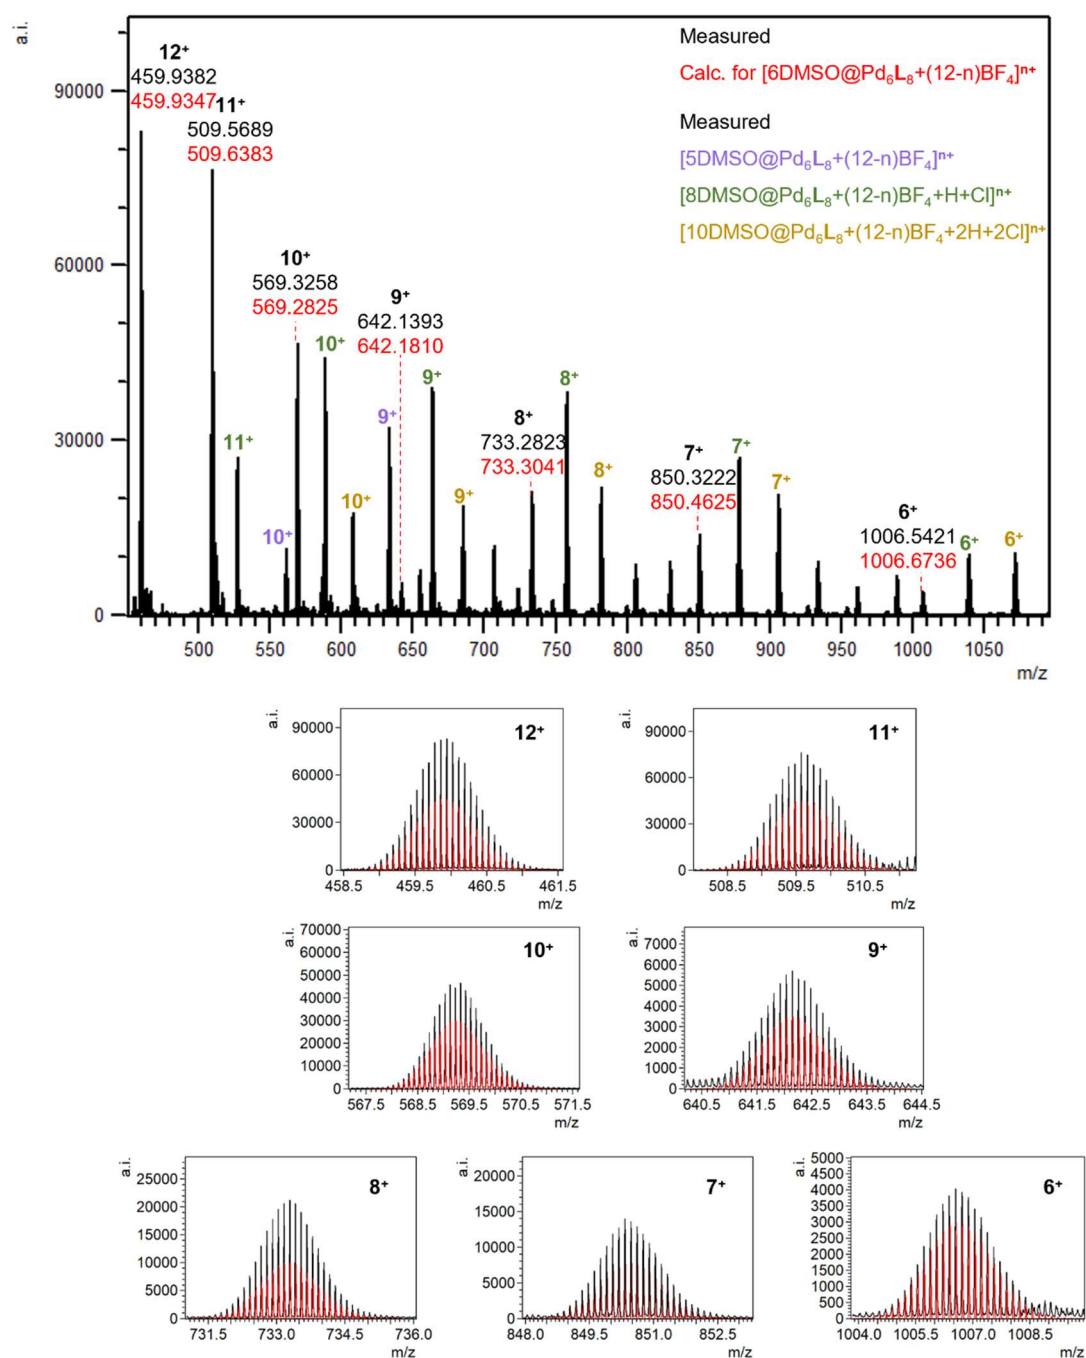

**Figure S18.** High-resolution ESI-MS spectrum of  $6\text{DMSO}@rac\text{-Pd}_6L_8$  in  $\text{CH}_3\text{CN}$ .

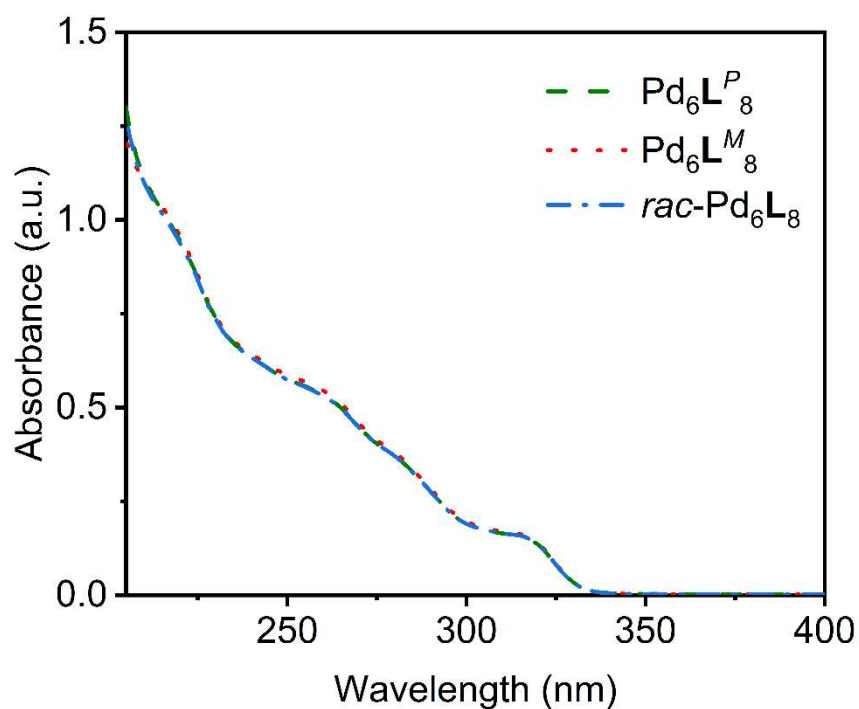

**Figure S19.** UV-vis spectra of Pd<sub>6</sub>L<sub>8</sub><sup>P</sup>, Pd<sub>6</sub>L<sub>8</sub><sup>M</sup>, and *rac*-Pd<sub>6</sub>L<sub>8</sub> in CH<sub>3</sub>CN (2 μM).

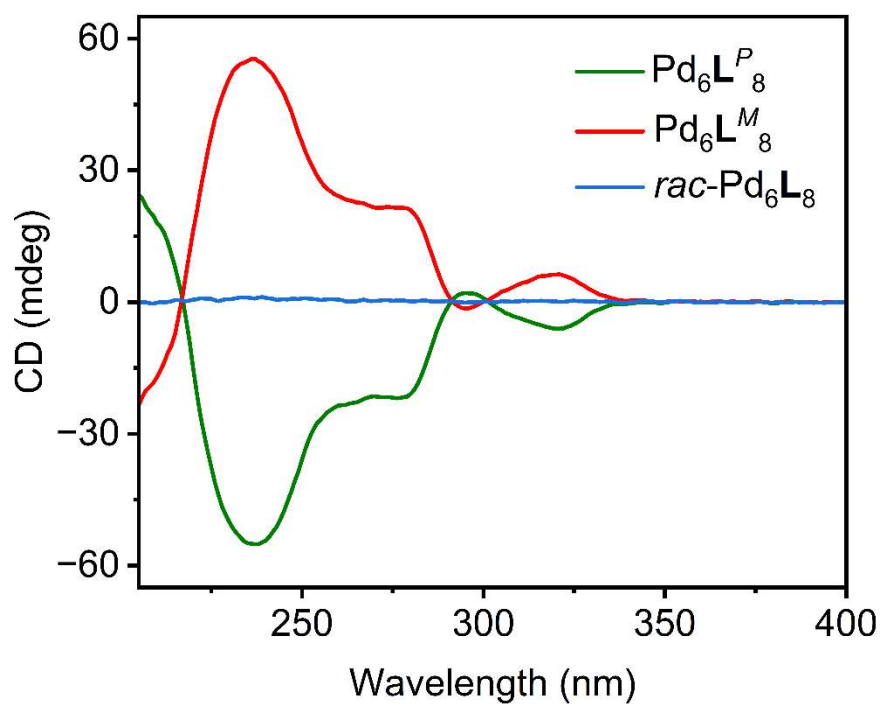

**Figure S20.** CD spectra of Pd<sub>6</sub>L<sub>8</sub><sup>P</sup>, Pd<sub>6</sub>L<sub>8</sub><sup>M</sup>, and *rac*-Pd<sub>6</sub>L<sub>8</sub> in CH<sub>3</sub>CN (2 μM).

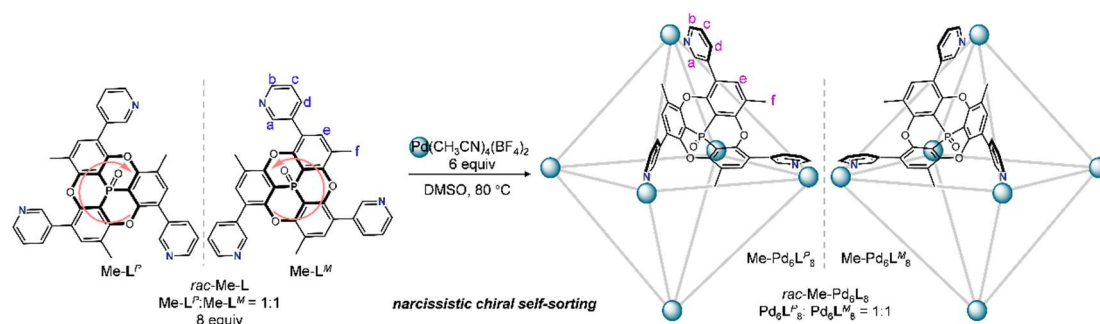

*Rac*-ligand Me-L (5.0 mg, 8.42 μmol) and Pd(CH<sub>3</sub>CN)<sub>4</sub>(BF<sub>4</sub>)<sub>2</sub> (2.8 mg, 6.32 μmol) were mixed in 1 mL of CD<sub>3</sub>SOCD<sub>3</sub> in a 5 mL tube. The reaction mixture was stirred at 80 °C for 30 minutes, resulting in a clear pale-yellow solution. <sup>1</sup>H NMR spectroscopy confirmed the quantitative formation of *rac*-Me-Pd<sub>6</sub>L<sub>8</sub>.

<sup>1</sup>H NMR (400 MHz, CD<sub>3</sub>SOCD<sub>3</sub>): δ 9.96 (s, 24H), 9.72 (d, *J* = 5.7 Hz, 24H), 8.24 (d, *J* = 8.2 Hz, 24H), 8.11 – 8.02 (m, 24H), 7.52 (s, 24H), 0.99 (s, 72H). <sup>13</sup>C NMR (100 MHz, CD<sub>3</sub>SOCD<sub>3</sub>): δ 156.4, 153.3, 150.0 (d, *J*<sub>C-P</sub> = 110.1 Hz), 137.9, 134.1, 132.2, 126.9, 124.5, 122.28 (d, *J*<sub>C-P</sub> = 5.6 Hz), 116.5, 110.4 (d, *J*<sub>C-P</sub> = 104.5 Hz), 12.3. <sup>31</sup>P NMR (162 MHz, CD<sub>3</sub>SOCD<sub>3</sub>): δ -37.42.

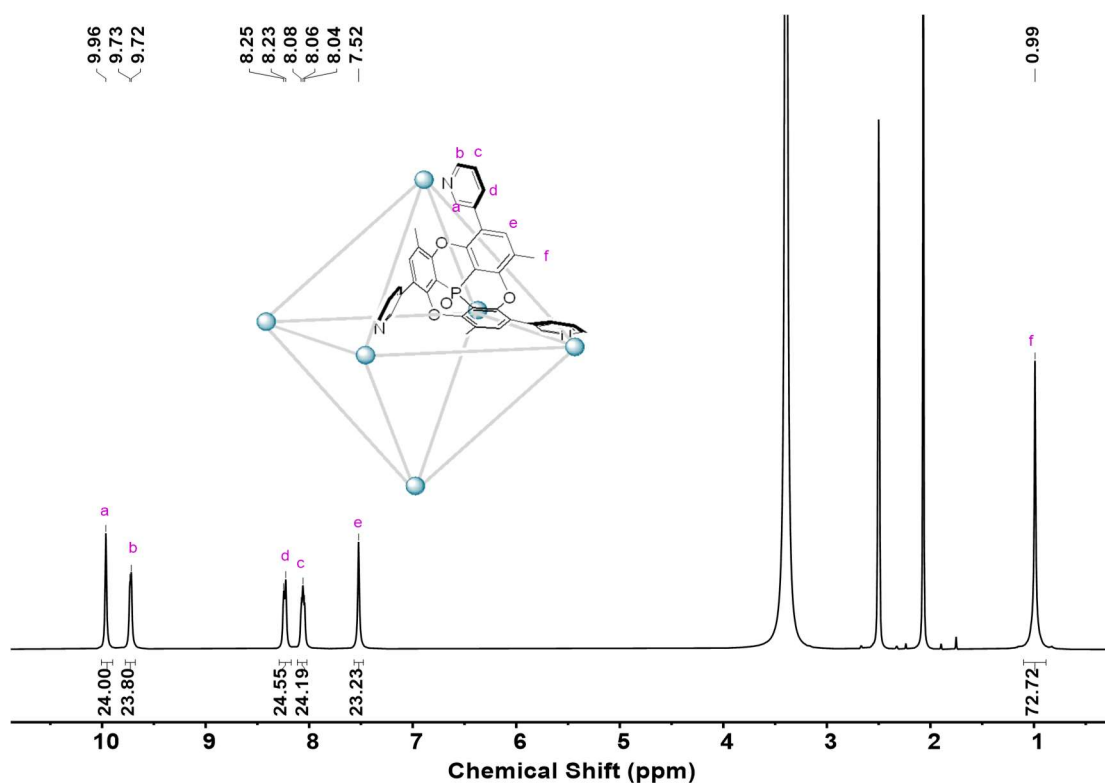

**Figure S21.** <sup>1</sup>H NMR spectrum of *rac*-Me-Pd<sub>6</sub>L<sub>8</sub> (400 MHz, CD<sub>3</sub>SOCD<sub>3</sub>, 25 °C).

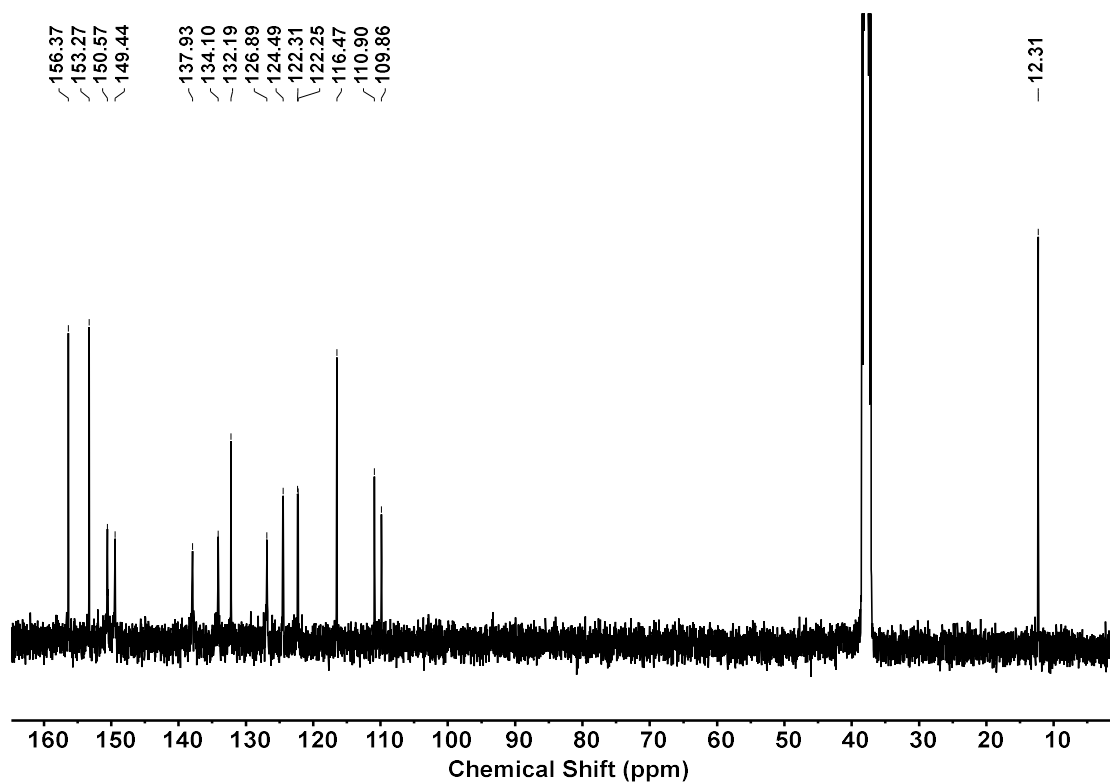

**Figure S22.** <sup>13</sup>C NMR spectrum of *rac*-Me-Pd<sub>6</sub>L<sub>8</sub> (100 MHz, CD<sub>3</sub>SOCD<sub>3</sub>, 25 °C).

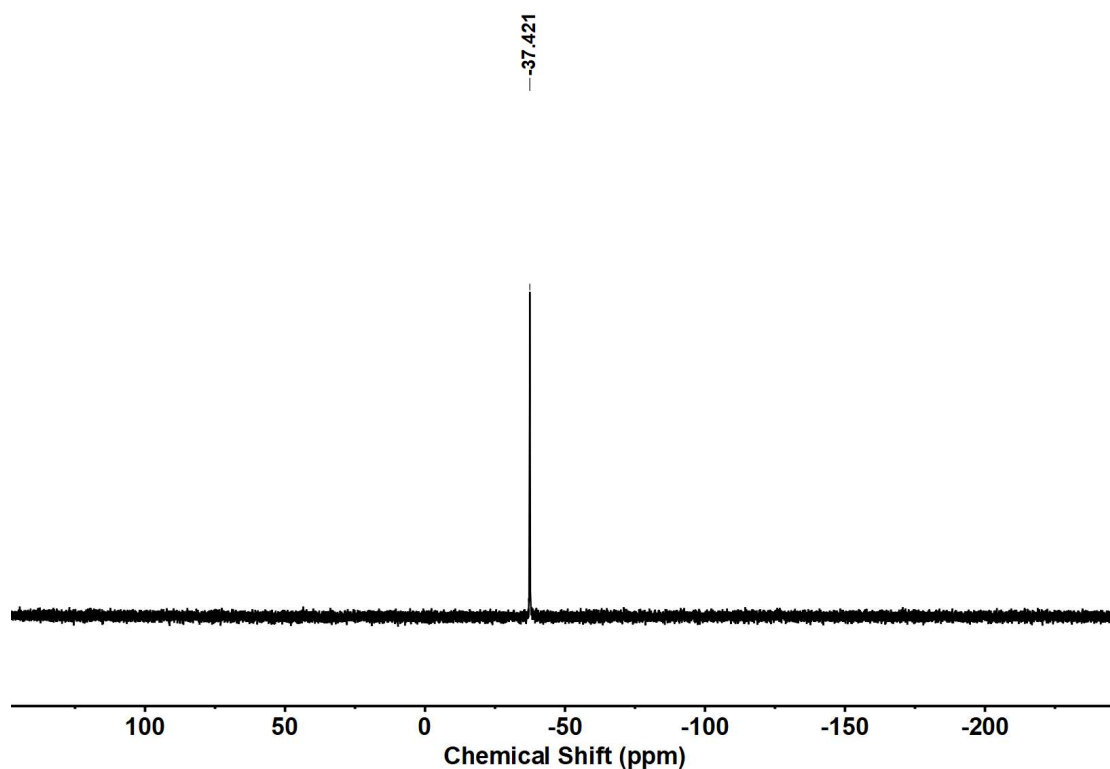

**Figure S23.** <sup>31</sup>P NMR spectrum of *rac*-Me-Pd<sub>6</sub>L<sub>8</sub> (162 MHz, CD<sub>3</sub>SOCD<sub>3</sub>, 25 °C).

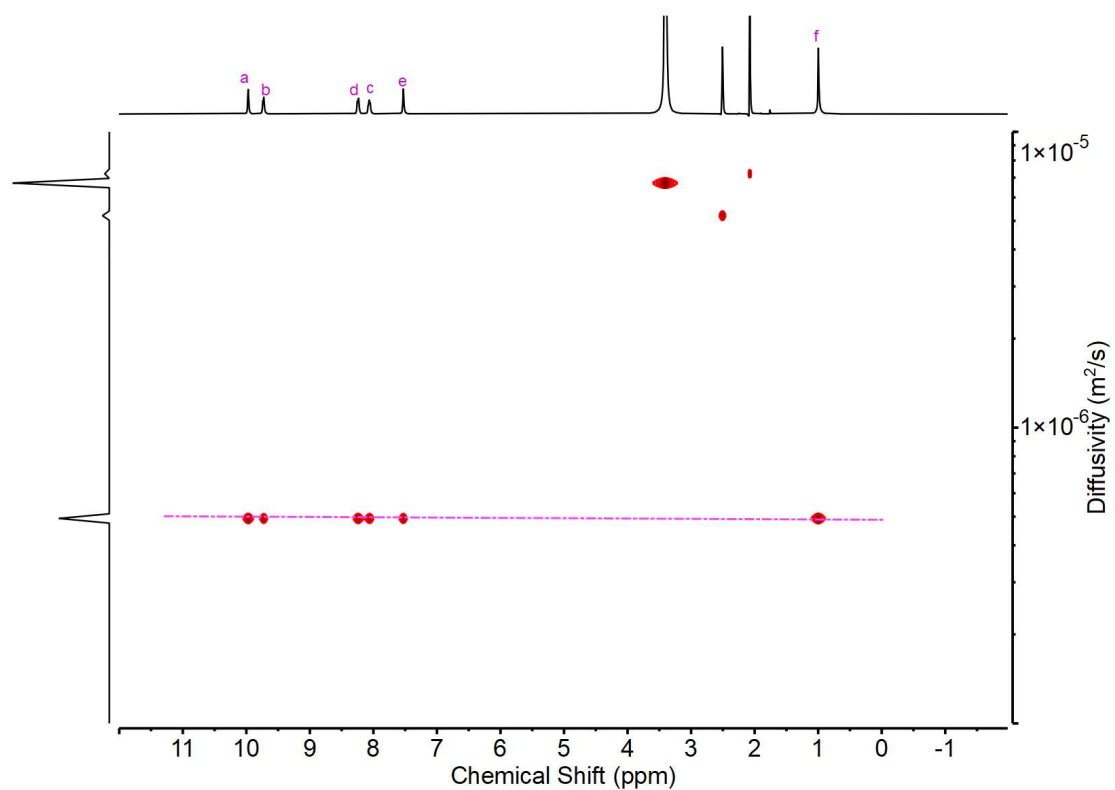

**Figure S24.**  $^1\text{H}$  DOSY spectrum of *rac*-Me-Pd<sub>6</sub>L<sub>8</sub> (400 MHz, CD<sub>3</sub>SOCD<sub>3</sub>, 25 °C).

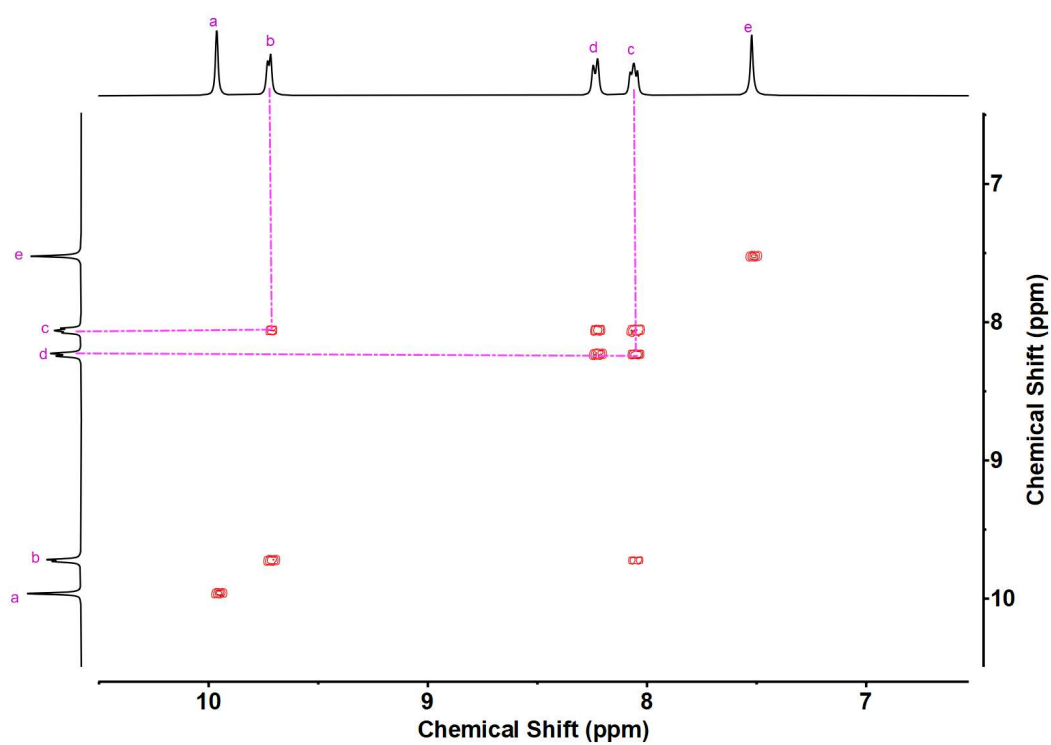

**Figure S25.**  $^1\text{H}$ - $^1\text{H}$  COSY NMR spectrum of *rac*-Me-Pd<sub>6</sub>L<sub>8</sub> (400 MHz, CD<sub>3</sub>SOCD<sub>3</sub>, 25 °C).

## 5 Host-Guest Properties of Pd<sub>6</sub>L<sub>8</sub> Cages

<sup>1</sup>H NMR titration experiments were carried out according to the following protocol: A host solution was prepared in 0.5 mL of CD<sub>3</sub>SOCD<sub>3</sub> at a concentration of 0.50 mM, using 1,3,5-trimethoxybenzene (4.0 mM) as an internal standard. A guest stock solution was prepared in CD<sub>3</sub>SOCD<sub>3</sub> at a concentration of 100 mM. Aliquots of the guest solution were gradually added to the host solution in an NMR tube. After each addition, the mixture was shaken for 1 minute before <sup>1</sup>H NMR spectra were acquired. Binding affinities were quantified by <sup>1</sup>H NMR titrations.

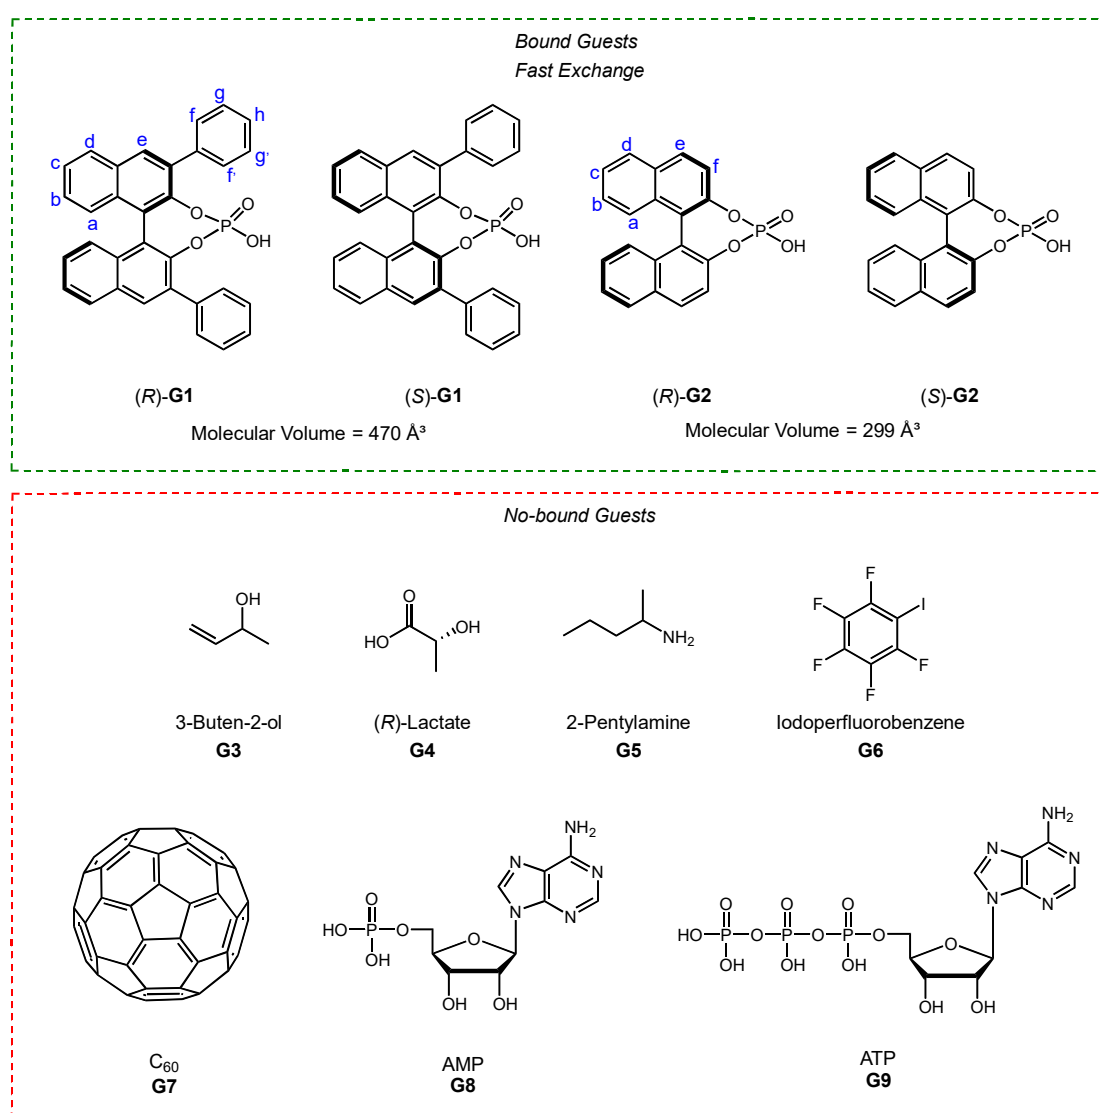

The apparent association constant ( $K_a$ ) and the Hill coefficient ( $n$ ) were determined by the Hill equation:

$$\begin{aligned}\theta &= \frac{[\text{HG}_n]}{[\text{HG}_n] + [\text{H}]} \\ &= \frac{[\text{G}]^n}{[\text{G}]^n + \left(\frac{1}{K_a}\right)^n}\end{aligned}$$

and thus

$$\log(\theta/1-\theta) = n\log[\text{G}] + n\log K_a$$

where  $\theta$  is the fraction of host bound by the guest which is determined by observed chemical shifts ( $\Delta\delta$ ) against the maximum chemical shift during titrations ( $\Delta\delta_{\text{max}}$ ),  $[\text{G}]$  is the guest concentration,  $n$  is the Hill coefficient describing cooperativity, and  $K_a$  is the apparent association constant.

Cooperativity is quantified by the Hill coefficient  $n$ , where  $n > 1$  indicates positively cooperative binding,  $n < 1$  indicates negatively cooperative binding, and  $n = 1$  indicates non-cooperative binding.

**Table S1.** Host-guest properties of 6DMSO@Pd<sub>6</sub>L<sup>P</sup><sub>8</sub> and 6DMSO@Pd<sub>6</sub>L<sup>M</sup><sub>8</sub>.<sup>a</sup>

| Guest  | $K_a$ (M <sup>-1</sup> ) upon Pd <sub>6</sub> L <sup>P</sup> <sub>8</sub> | $K_a$ (M <sup>-1</sup> ) upon Pd <sub>6</sub> L <sup>M</sup> <sub>8</sub> |
|--------|---------------------------------------------------------------------------|---------------------------------------------------------------------------|
| (R)-G1 | $(8.40 \pm 0.05) \times 10^2$                                             | $(6.77 \pm 0.04) \times 10^2$                                             |
| (S)-G1 | $(6.79 \pm 0.04) \times 10^2$                                             | $(8.42 \pm 0.06) \times 10^2$                                             |
| (R)-G2 | $(0.81 \pm 0.05) \times 10^2$                                             | $(1.50 \pm 0.06) \times 10^2$                                             |
| (S)-G2 | $(1.47 \pm 0.07) \times 10^2$                                             | $(0.81 \pm 0.05) \times 10^2$                                             |

<sup>a</sup>The data was also summarized in the manuscript Table 1.

### 5.1 Host-Guest Interaction of 6DMSO@Pd<sub>6</sub>L<sup>P</sup><sub>8</sub> with (*R*)-**G1** and (*S*)-**G1**

Chemical shift changes of 6DMSO@Pd<sub>6</sub>L<sup>P</sup><sub>8</sub> were plotted and fitted with a Hill function with apparent association constants determined to be  $(8.40 \pm 0.05) \times 10^2 \text{ M}^{-1}$  and  $(6.79 \pm 0.04) \times 10^2 \text{ M}^{-1}$  for (*R*)-**G1** and (*S*)-**G1**, respectively. In both cases, Hill coefficients were determined to be approximately 1, indicating non-cooperative binding of **G1** by 6DMSO@Pd<sub>6</sub>L<sup>P</sup><sub>8</sub>.

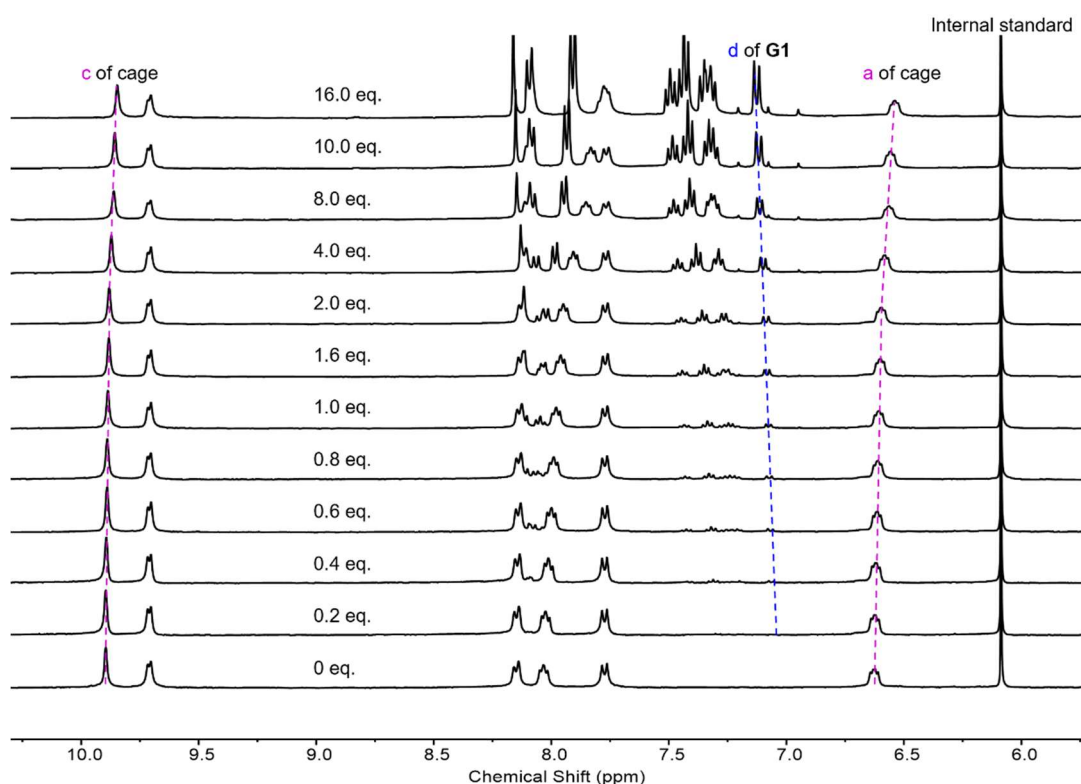

**Figure S26.** <sup>1</sup>H NMR spectra upon addition of (*R*)-**G1** into 6DMSO@Pd<sub>6</sub>L<sup>P</sup><sub>8</sub> using 1,3,5-trimethoxybenzene as internal standard (400 MHz, CD<sub>3</sub>SOCD<sub>3</sub>, 25 °C).

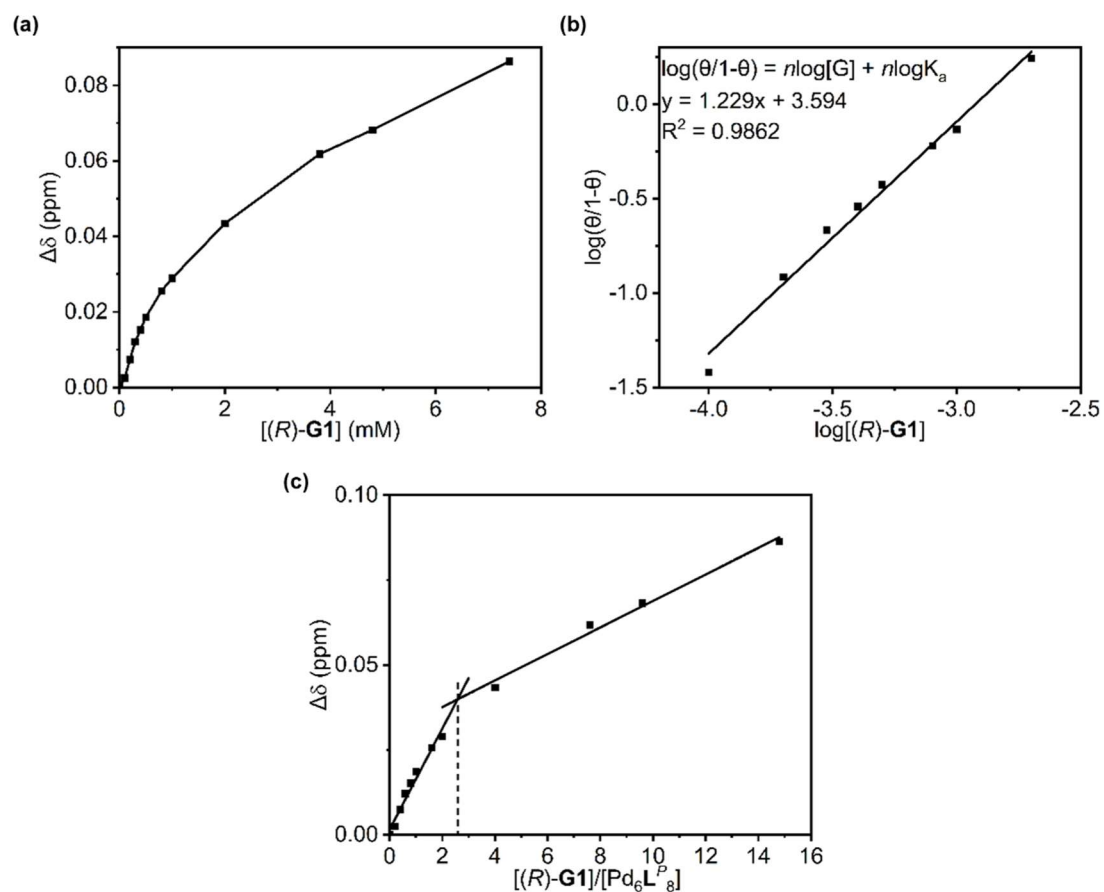

**Figure S27.** Titration Analysis. **(a)** Titration curves of (R)-G1 bound by 6DMSO@Pd<sub>6</sub>L<sub>8</sub>. **(b)** Hill function. **(c)** The stoichiometry was found to be three guest molecules per one host molecule using the mole ratio method.<sup>3</sup>

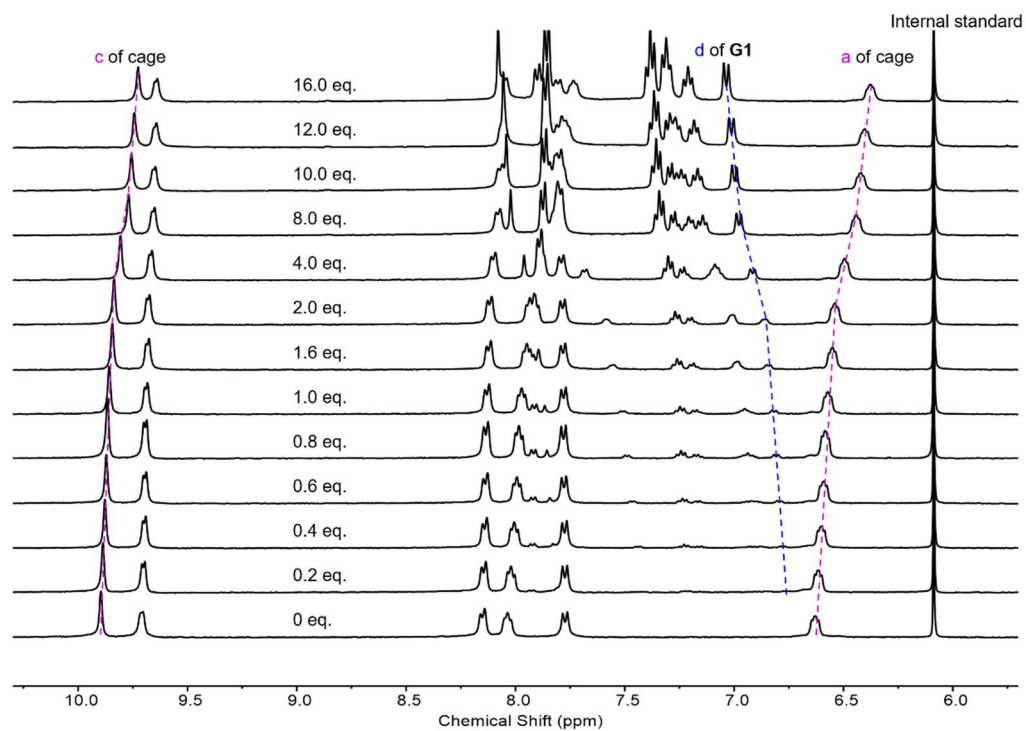

**Figure S28.**  $^1\text{H}$  NMR spectra upon addition of (S)-G1 into  $6\text{DMSO}@Pd_6L^P_8$  using 1,3,5-trimethoxybenzene as internal standard (400 MHz,  $\text{CD}_3\text{SOCD}_3$ , 25 °C).

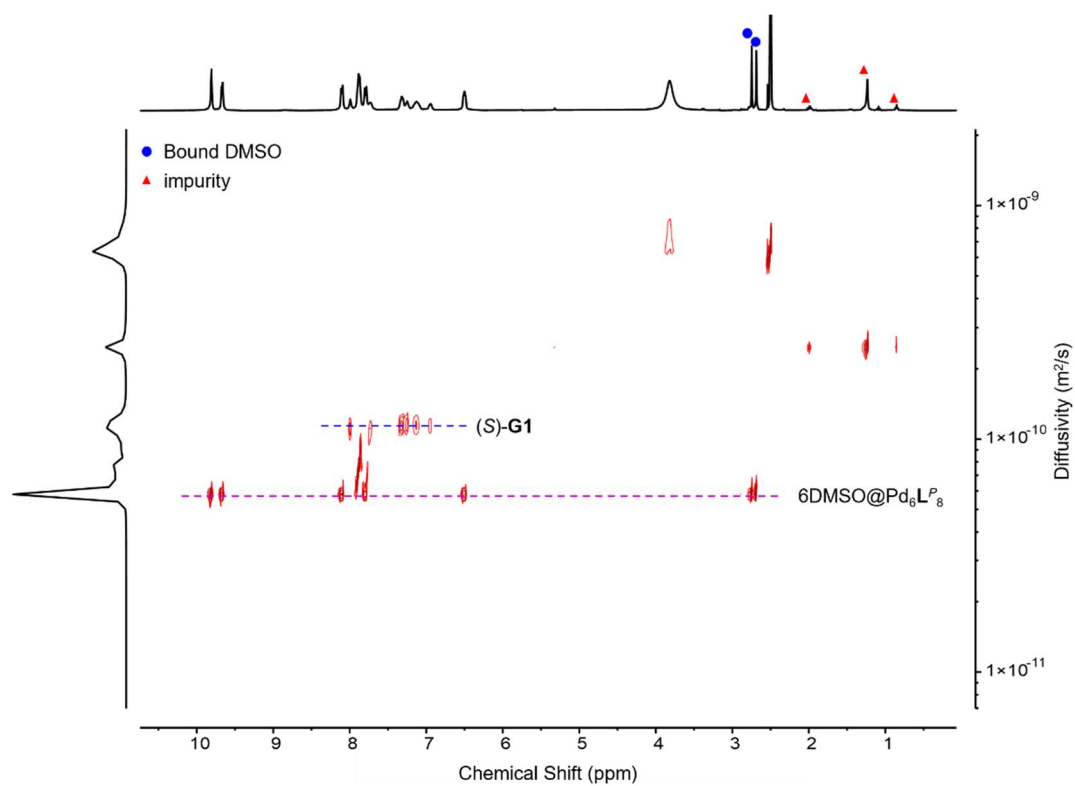

**Figure S29.**  $^1\text{H}$  DOSY spectrum of  $6\text{DMSO}@Pd_6L^P_8$  with 4.0 equiv of (S)-G1 (400 MHz,  $\text{CD}_3\text{SOCD}_3$ , 25 °C).

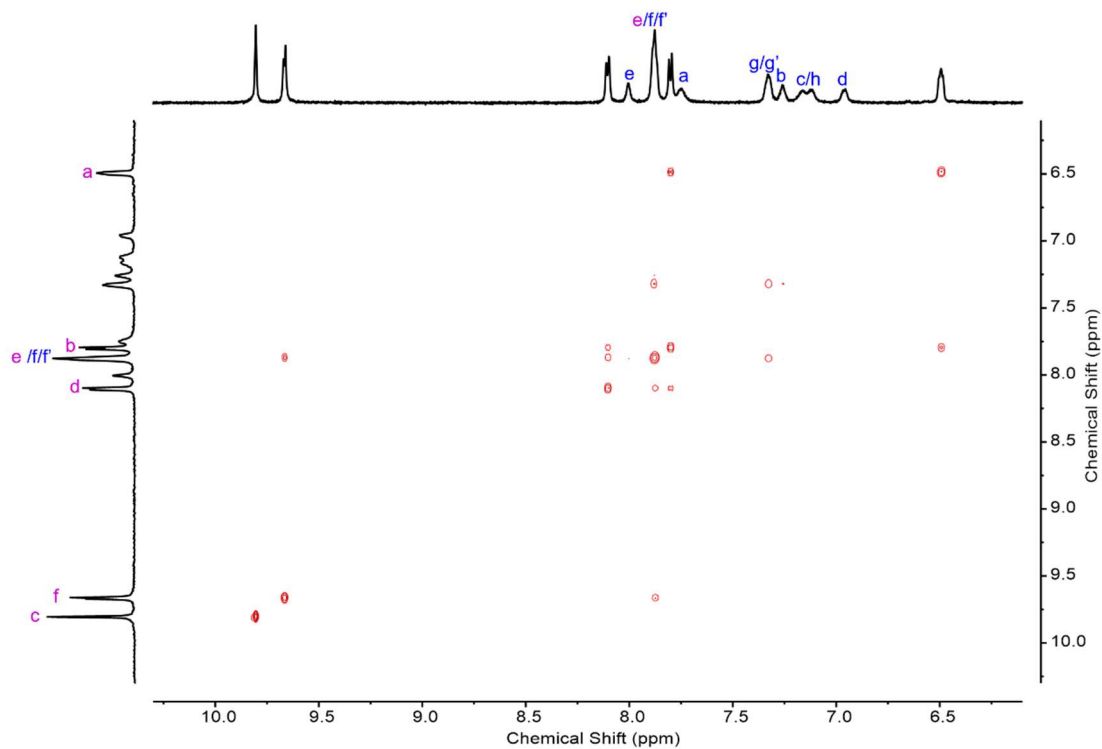

**Figure S30.**  $^1\text{H}$ - $^1\text{H}$  NOESY NMR spectrum of 6DMSO@Pd<sub>6</sub>L<sup>P</sup><sub>8</sub> with 4.0 equiv of (S)-G1 (400 MHz, CD<sub>3</sub>SOCD<sub>3</sub>, 25 °C). No intermolecular NOE correlations between the host and the guest were observed.

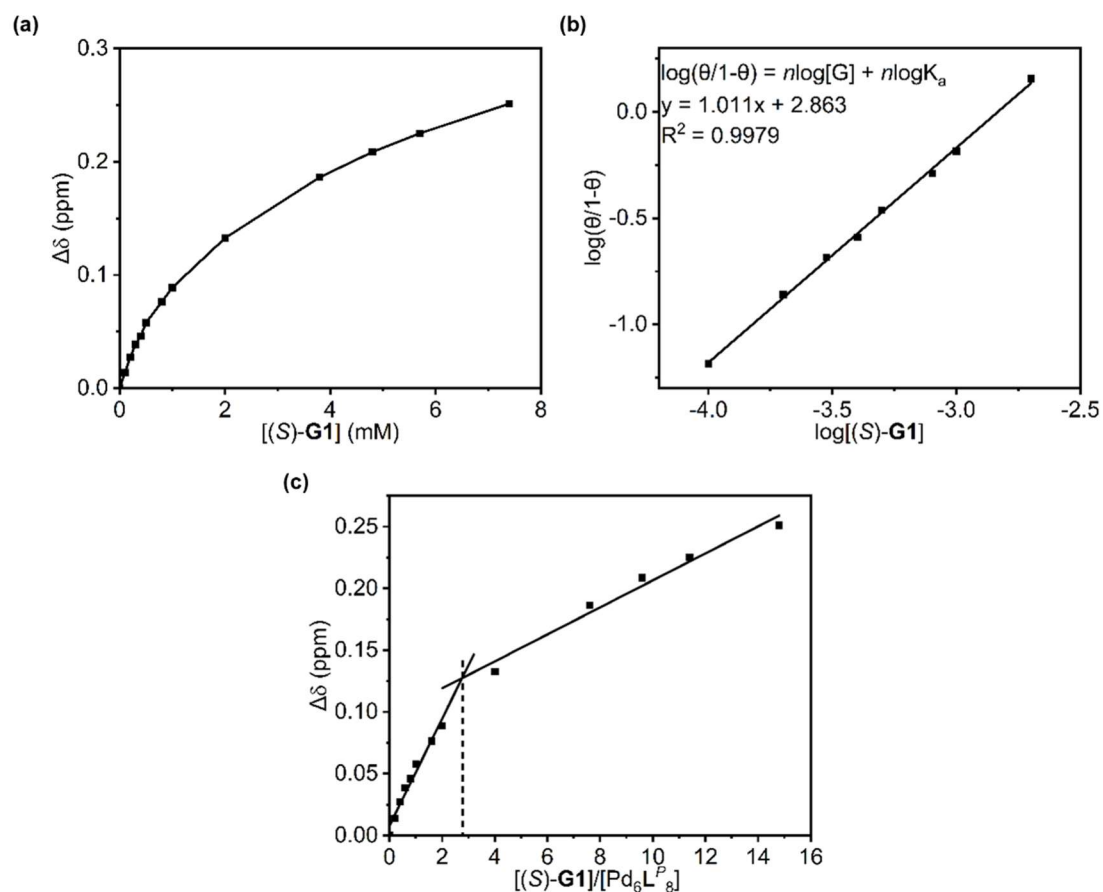

**Figure S31.** Titration Analysis. **(a)** Titration curves of (S)-G1 bound by 6DMSO@Pd<sub>6</sub>L<sub>8</sub>. **(b)** Hill function. **(c)** The stoichiometry was found to be three guest molecules per one host molecule using the mole ratio method.<sup>3</sup>

## 5.2 Host-Guest Interaction of 6DMSO@Pd<sub>6</sub>L<sup>M</sup><sub>8</sub> with (*R*)-G1 and (*S*)-G1

Chemical shift changes of 6DMSO@Pd<sub>6</sub>L<sup>M</sup><sub>8</sub> were plotted and fitted with a Hill function with apparent association constants determined to be  $(6.77 \pm 0.04) \times 10^2 \text{ M}^{-1}$  and  $(8.42 \pm 0.06) \times 10^2 \text{ M}^{-1}$  for (*R*)-G1 and (*S*)-G1, respectively. In both cases, Hill coefficients were determined to be approximately 1, indicating non-cooperative binding of G1 by 6DMSO@Pd<sub>6</sub>L<sup>M</sup><sub>8</sub>.

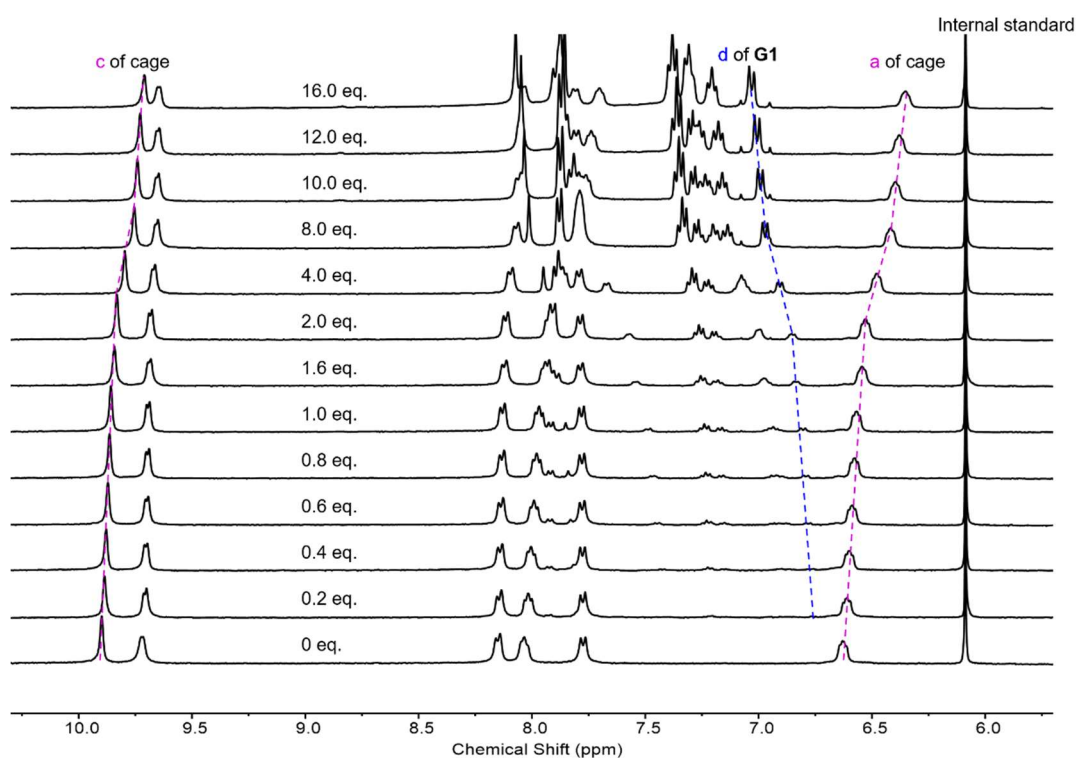

**Figure S32.** <sup>1</sup>H NMR spectra upon addition of (*R*)-G1 into 6DMSO@Pd<sub>6</sub>L<sup>M</sup><sub>8</sub> using 1,3,5-trimethoxybenzene as internal standard (400 MHz, CD<sub>3</sub>SOCD<sub>3</sub>, 25 °C).

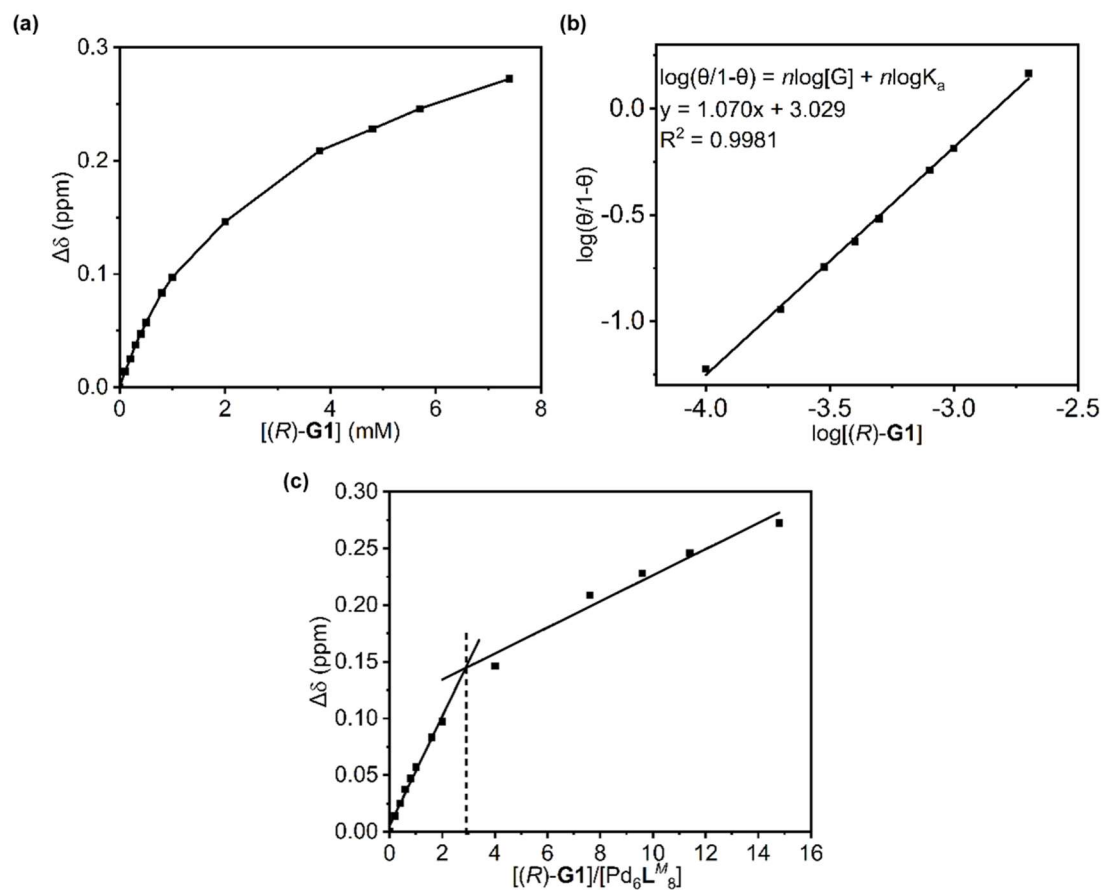

**Figure S33.** Titration Analysis. **(a)** Titration curves of (R)-G1 bound by 6DMSO@Pd<sub>6</sub>L<sub>8</sub>. **(b)** Hill function. **(c)** The stoichiometry was found to be three guest molecules per one host molecule using the mole ratio method.<sup>3</sup>

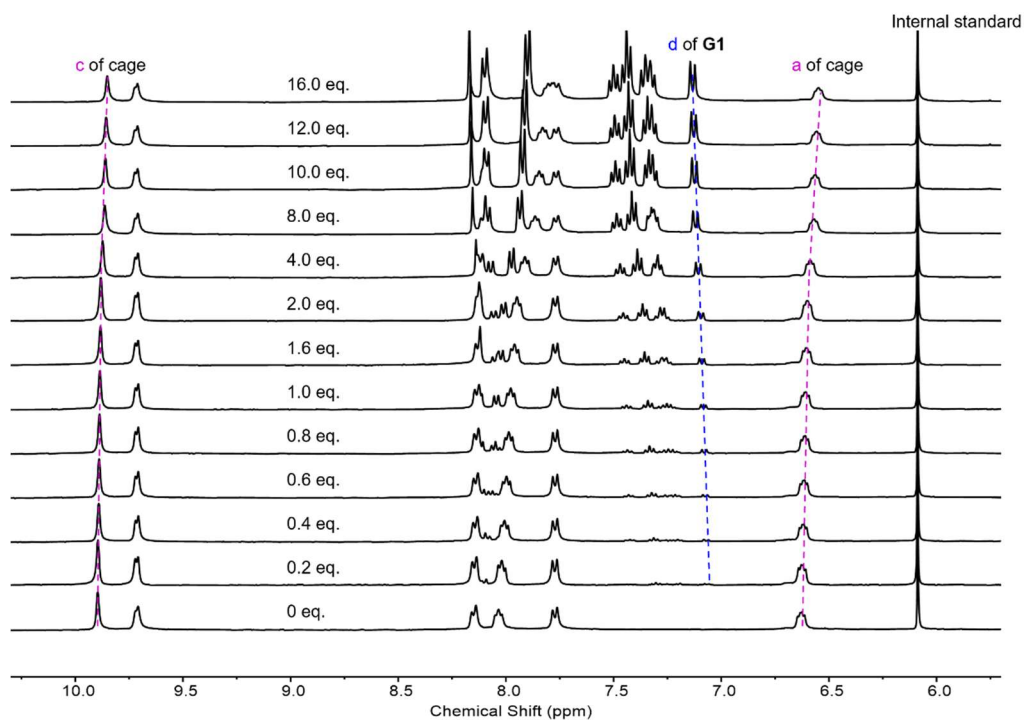

**Figure S34.**  $^1\text{H}$  NMR spectra upon addition of (S)-**G1** into  $6\text{DMSO}@Pd_6L^M_8$  using 1,3,5-trimethoxybenzene as internal standard (400 MHz,  $\text{CD}_3\text{SOCD}_3$ , 25 °C).

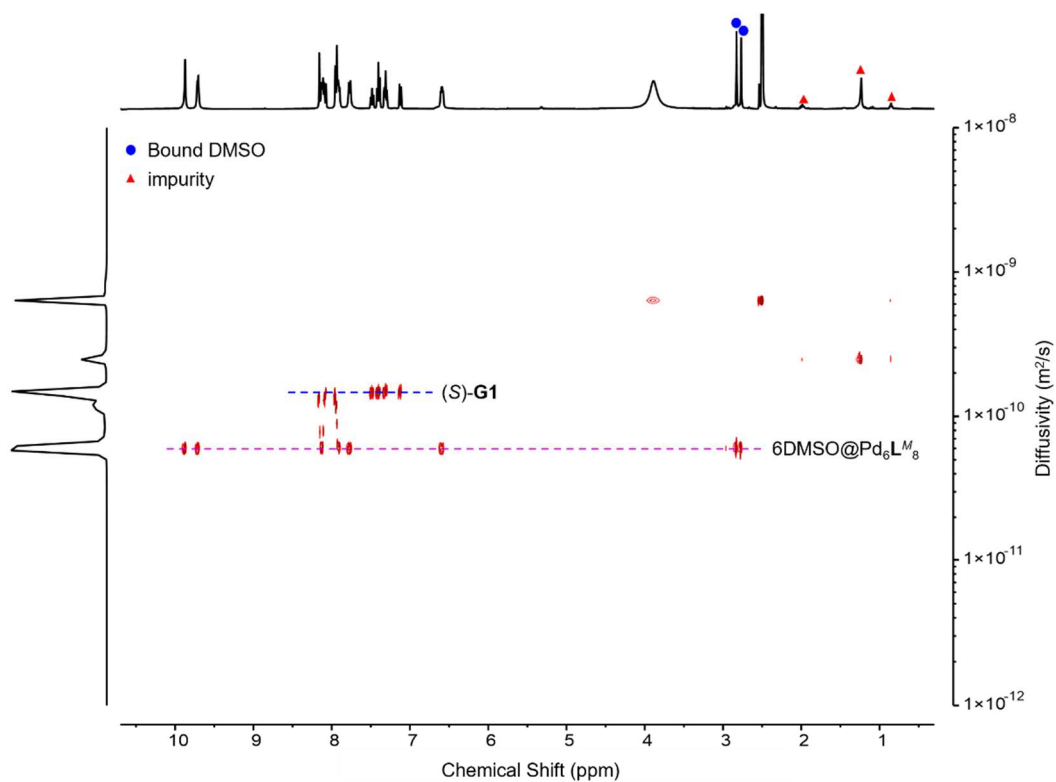

**Figure S35.**  $^1\text{H}$  DOSY spectrum of  $6\text{DMSO}@Pd_6L^M_8$  with 4.0 equiv of (S)-**G1** (400 MHz,  $\text{CD}_3\text{SOCD}_3$ , 25 °C).

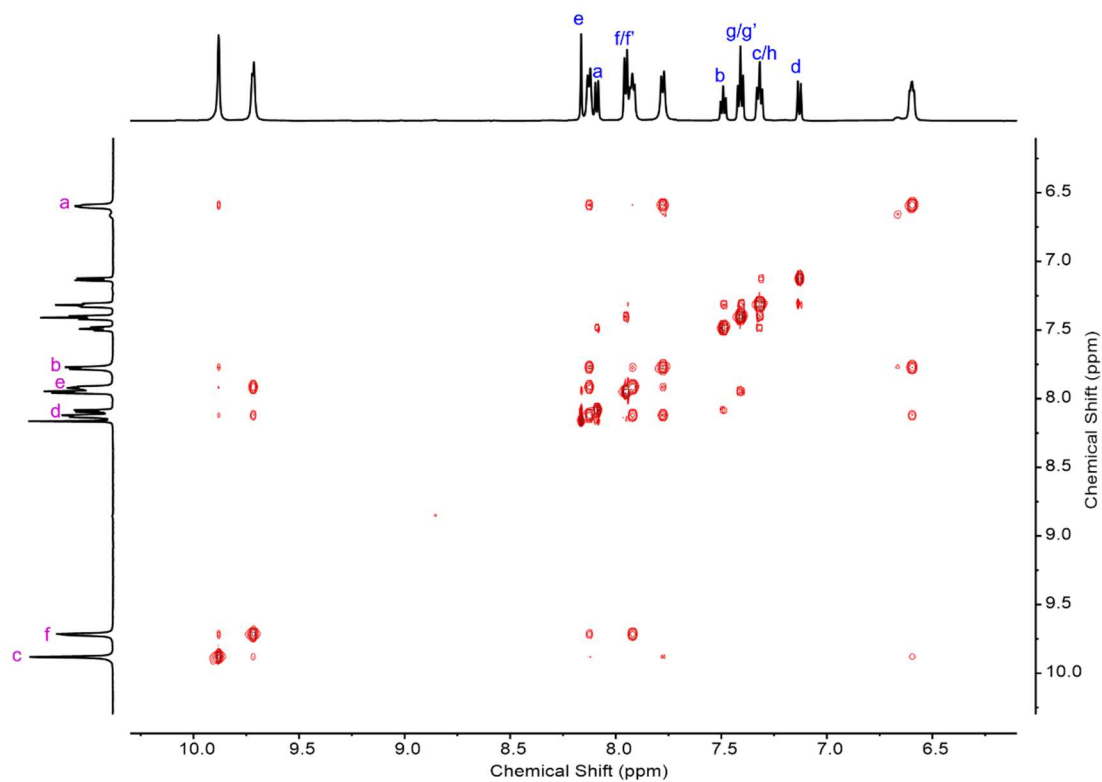

**Figure S36.** <sup>1</sup>H-<sup>1</sup>H NOESY NMR spectrum of 6DMSO@Pd<sub>6</sub>L<sub>8</sub> with 4.0 equiv of (S)-G1 (400 MHz, CD<sub>3</sub>SOCD<sub>3</sub>, 25 °C). No intermolecular NOE correlations between the host and the guest were observed.

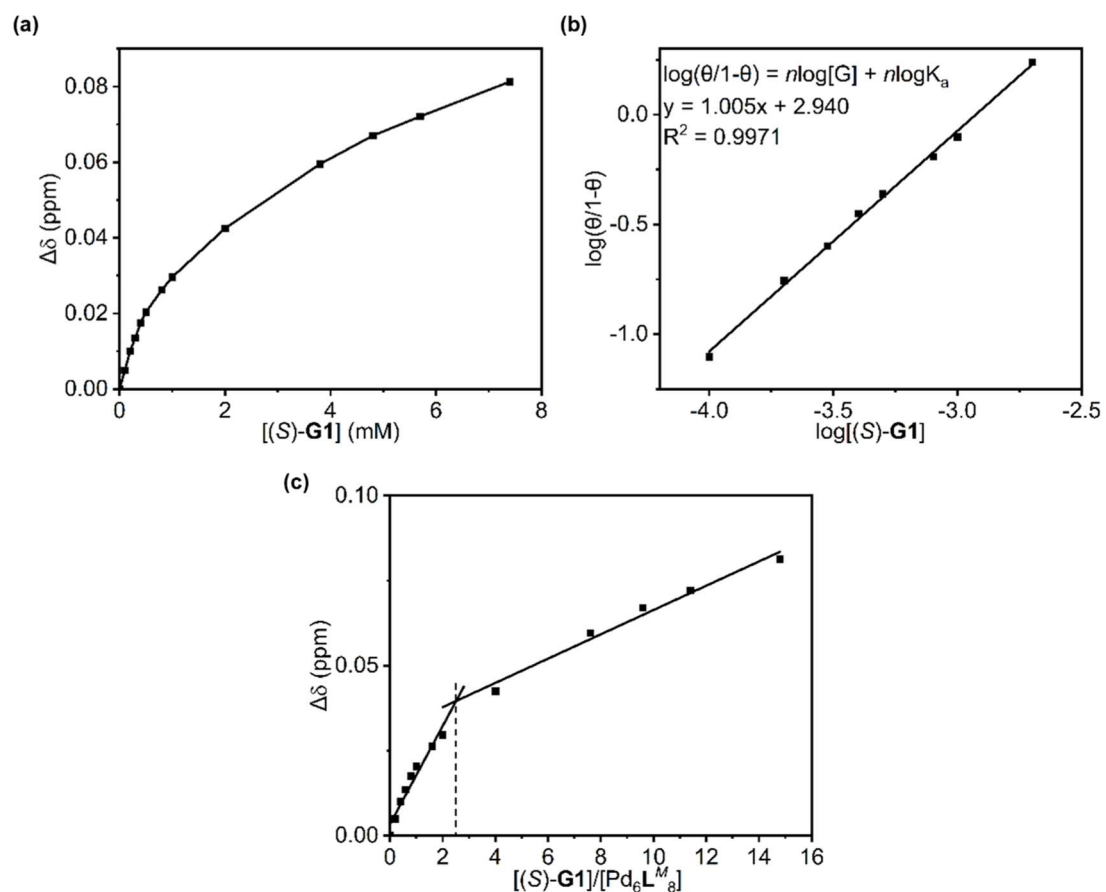

**Figure S37.** Titration Analysis. **(a)** Titration curves of (S)-G1 bound by 6DMSO@Pd<sub>6</sub>L<sub>8</sub>. **(b)** Hill function. **(c)** The stoichiometry was found to be three guest molecules per one host molecule using the mole ratio method.<sup>3</sup>

### 5.3 Host-Guest Interaction of 6DMSO@Pd<sub>6</sub>L<sup>P</sup><sub>8</sub> with (*R*)-**G2** and (*S*)-**G2**

Chemical shift changes of 6DMSO@Pd<sub>6</sub>L<sup>P</sup><sub>8</sub> were plotted and fitted with a Hill function with apparent association constants determined to be  $(0.81 \pm 0.05) \times 10^2 \text{ M}^{-1}$  and  $(1.47 \pm 0.07) \times 10^2 \text{ M}^{-1}$  for (*R*)-**G2** and (*S*)-**G2**, respectively. In both cases, Hill coefficients were determined to be approximately 1, indicating non-cooperative binding of **G2** by 6DMSO@Pd<sub>6</sub>L<sup>P</sup><sub>8</sub>.

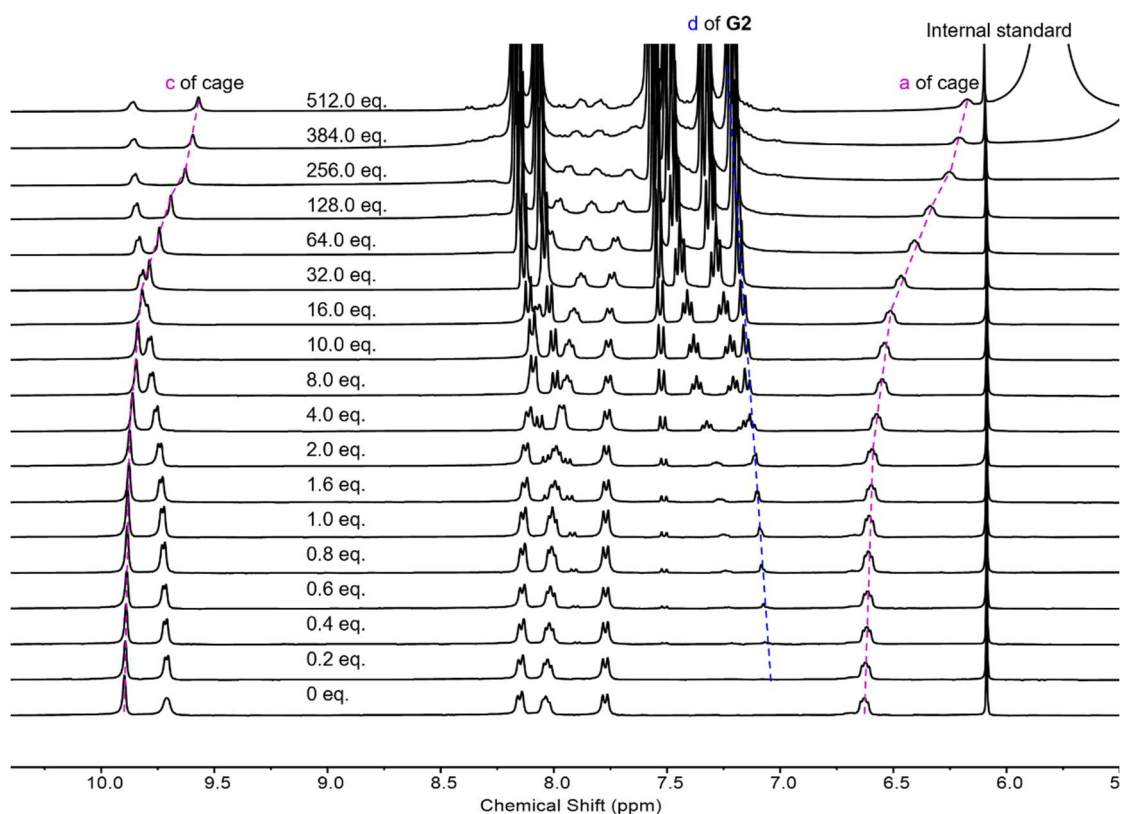

**Figure S38.** <sup>1</sup>H NMR spectra upon addition of (*R*)-**G2** into 6DMSO@Pd<sub>6</sub>L<sup>P</sup><sub>8</sub> using 1,3,5-trimethoxybenzene as internal standard (400 MHz, CD<sub>3</sub>SOCD<sub>3</sub>, 25 °C).

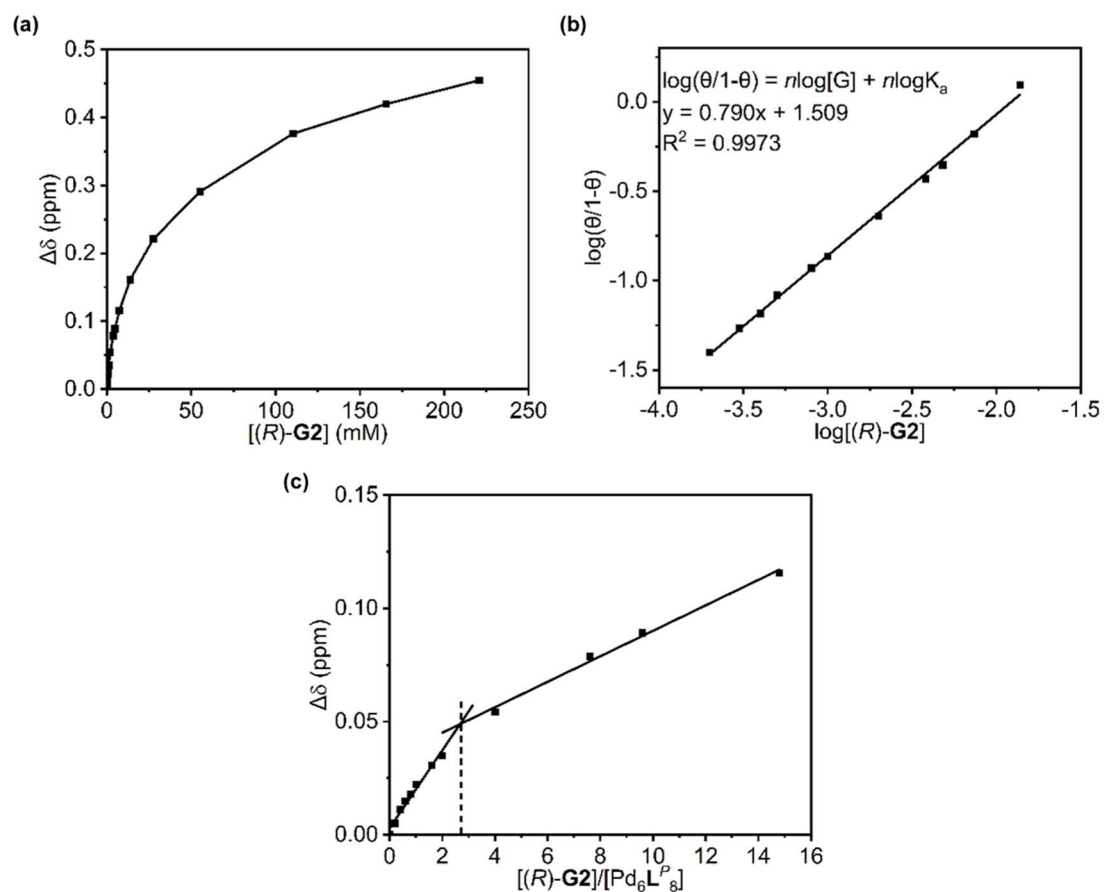

**Figure S39.** Titration Analysis. **(a)** Titration curves of  $(R)\text{-G2}$  bound by  $6\text{DMSO}@Pd_6L_8^{\text{P}_8}$ . **(b)** Hill function. **(c)** The stoichiometry was found to be three guest molecules per one host molecule using the mole ratio method.<sup>3</sup>

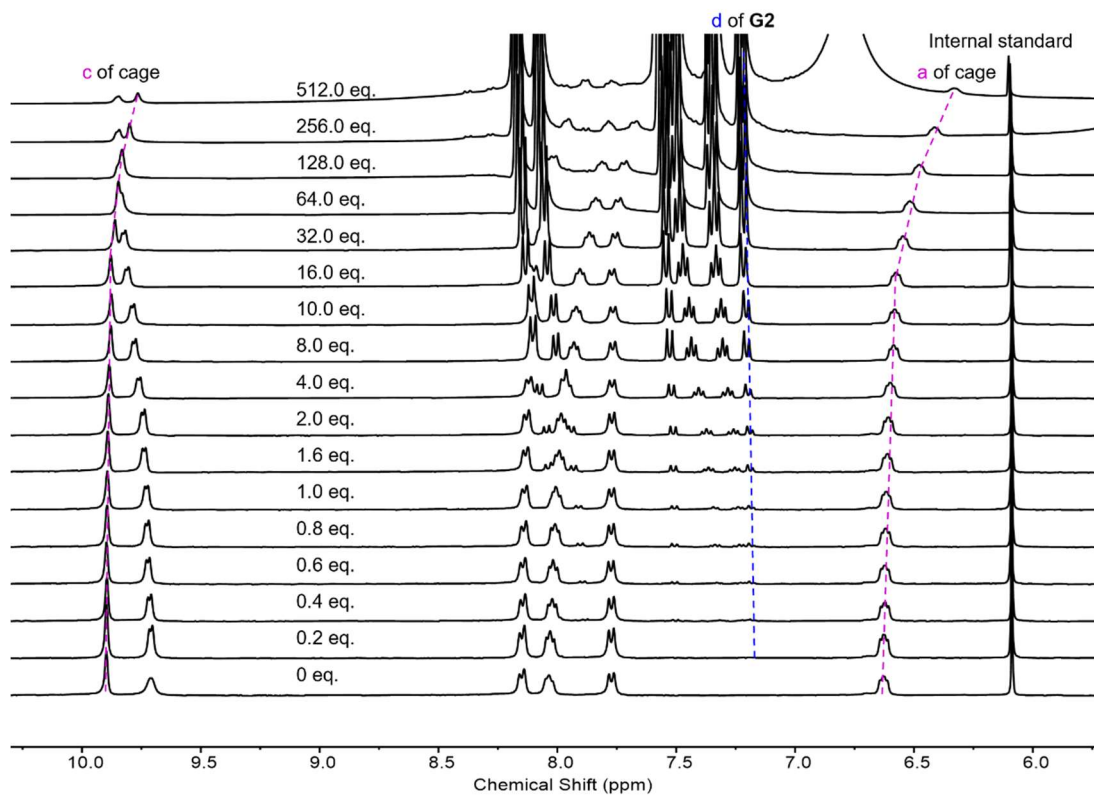

**Figure S40.**  $^1\text{H}$  NMR spectra upon addition of  $(S)\text{-G2}$  into  $6\text{DMSO@Pd}_6\text{L}^P_8$  using 1,3,5-trimethoxybenzene as internal standard (400 MHz,  $\text{CD}_3\text{SOCD}_3$ , 25  $^\circ\text{C}$ ).

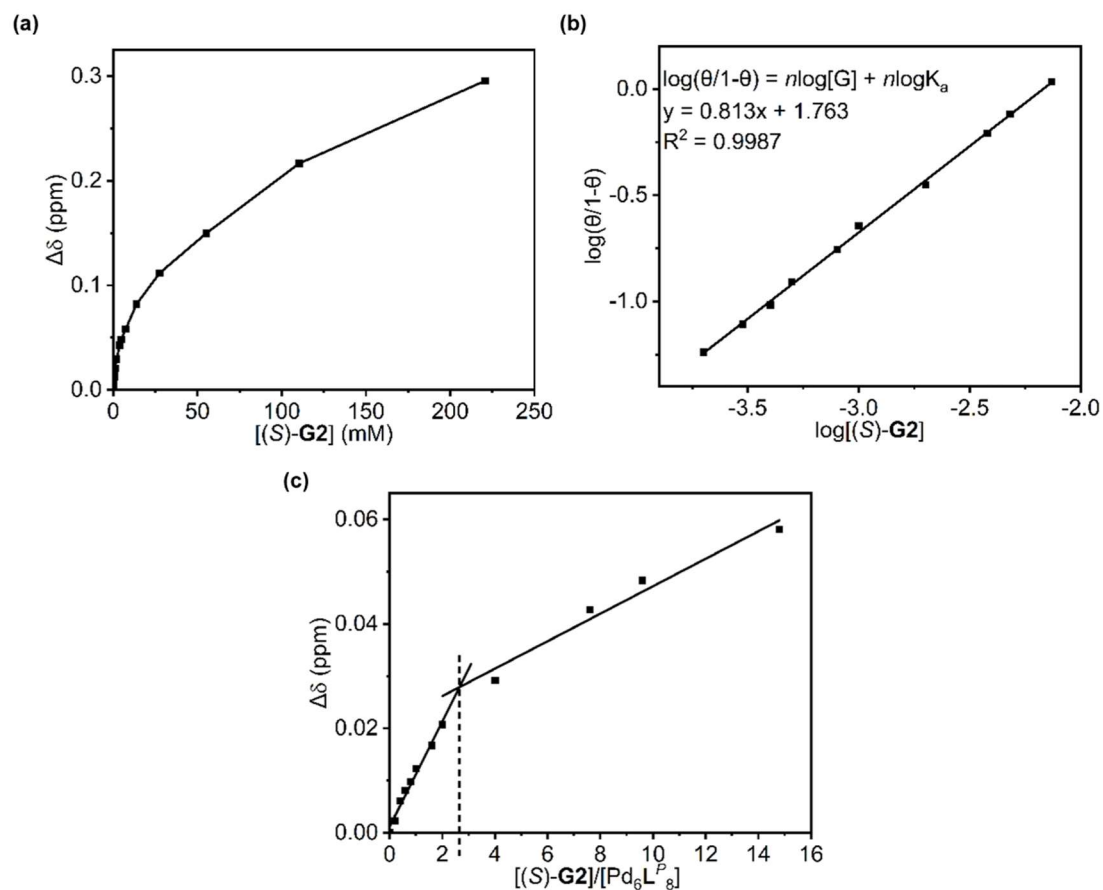

**Figure S41.** Titration Analysis. **(a)** Titration curves of (S)-G2 bound by 6DMSO@Pd<sub>6</sub>L<sub>8</sub>. **(b)** Hill function. **(c)** The stoichiometry was found to be three guest molecules per one host molecule using the mole ratio method.<sup>3</sup>

#### 5.4 Host-Guest Interaction of 6DMSO@Pd<sub>6</sub>L<sup>M</sup><sub>8</sub> with (*R*)-**G2** and (*S*)-**G2**

Chemical shift changes of 6DMSO@Pd<sub>6</sub>L<sup>M</sup><sub>8</sub> were plotted and fitted with a Hill function with apparent association constants determined to be  $(1.50 \pm 0.06) \times 10^2 \text{ M}^{-1}$  and  $(0.81 \pm 0.05) \times 10^2 \text{ M}^{-1}$  for (*R*)-**G2** and (*S*)-**G2**, respectively. In both cases, Hill coefficients were determined to be approximately 1, indicating non-cooperative binding of **G2** by 6DMSO@Pd<sub>6</sub>L<sup>M</sup><sub>8</sub>.

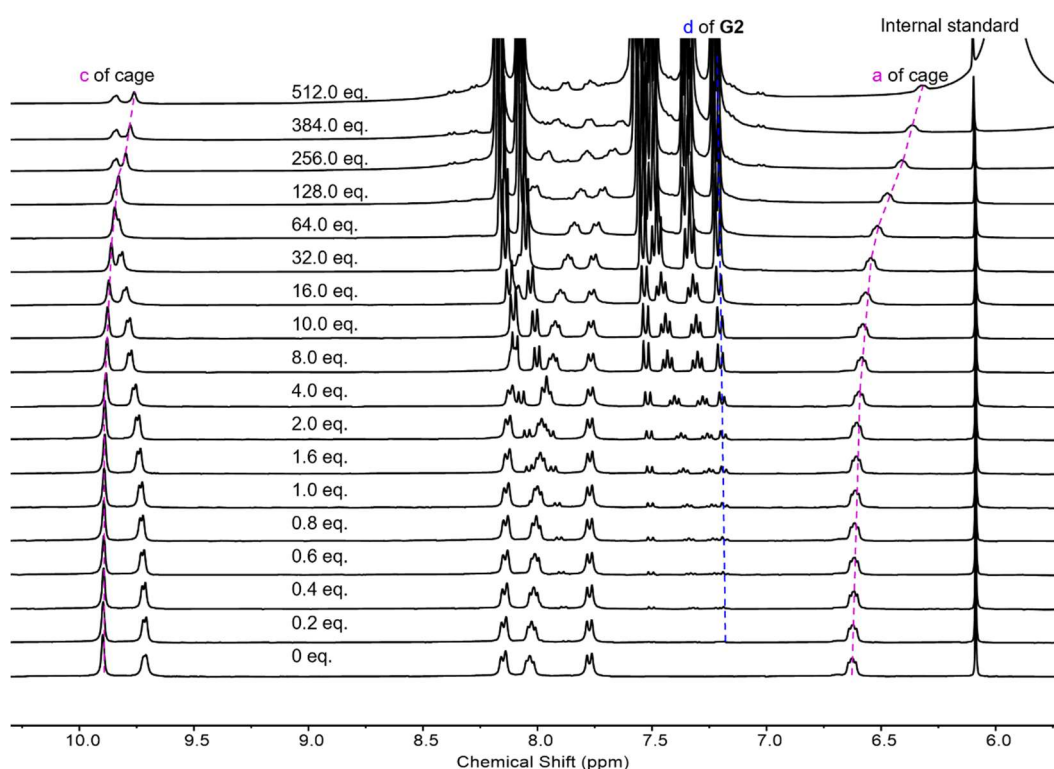

**Figure S42.** <sup>1</sup>H NMR spectra upon addition of (*R*)-**G2** into 6DMSO@Pd<sub>6</sub>L<sup>M</sup><sub>8</sub> using 1,3,5-trimethoxybenzene as internal standard (400 MHz, CD<sub>3</sub>SOCD<sub>3</sub>, 25 °C).

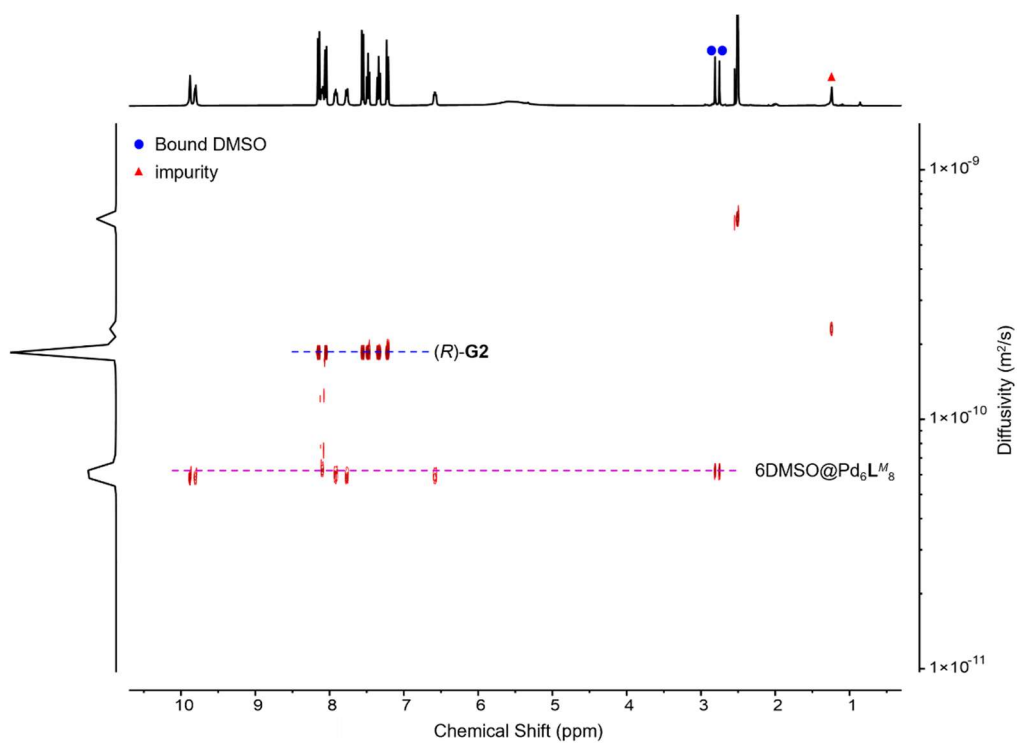

**Figure S43.** <sup>1</sup>H DOSY spectrum of 6DMSO@Pd<sub>6</sub>L<sub>8</sub><sup>M</sup> with 16.0 equiv of (R)-G2 (400 MHz, CD<sub>3</sub>SOCD<sub>3</sub>, 25 °C).

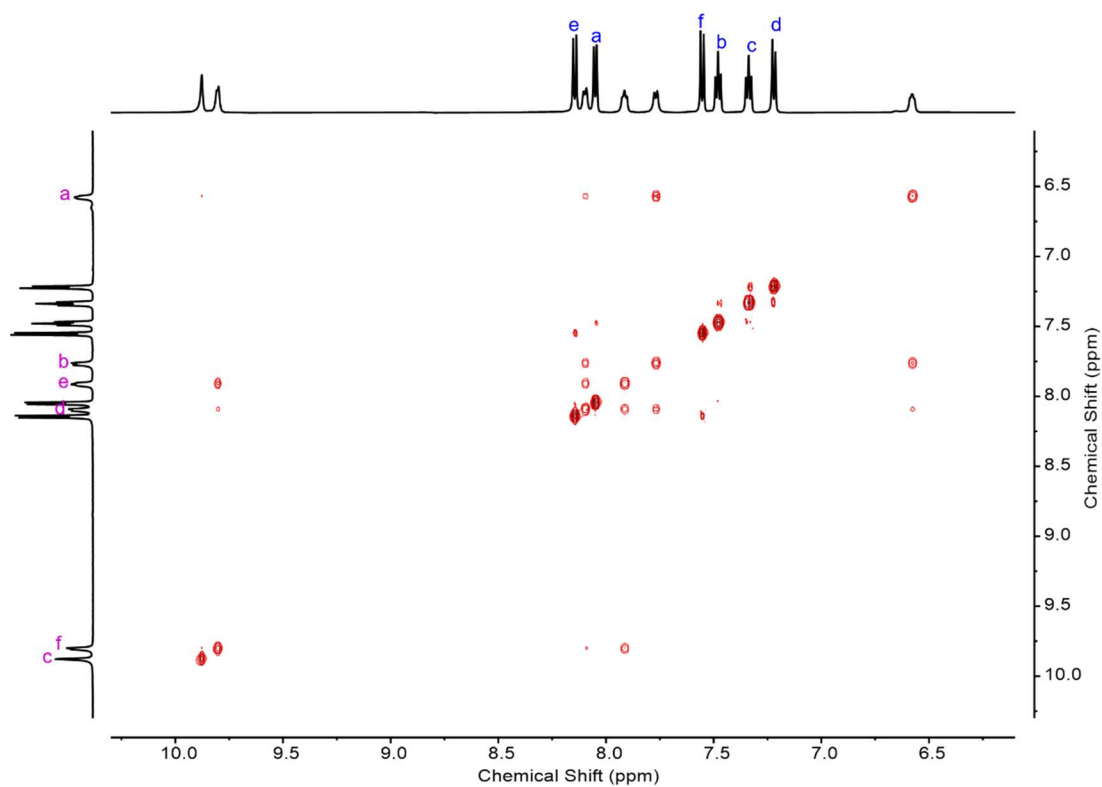

**Figure S44.** <sup>1</sup>H-<sup>1</sup>H NOESY NMR spectrum of 6DMSO@Pd<sub>6</sub>L<sup>M</sup><sub>8</sub> with 16.0 equiv of (*R*)-**G2** (400 MHz, CD<sub>3</sub>SOCD<sub>3</sub>, 25 °C). No intermolecular NOE correlations between the host and the guest were observed.

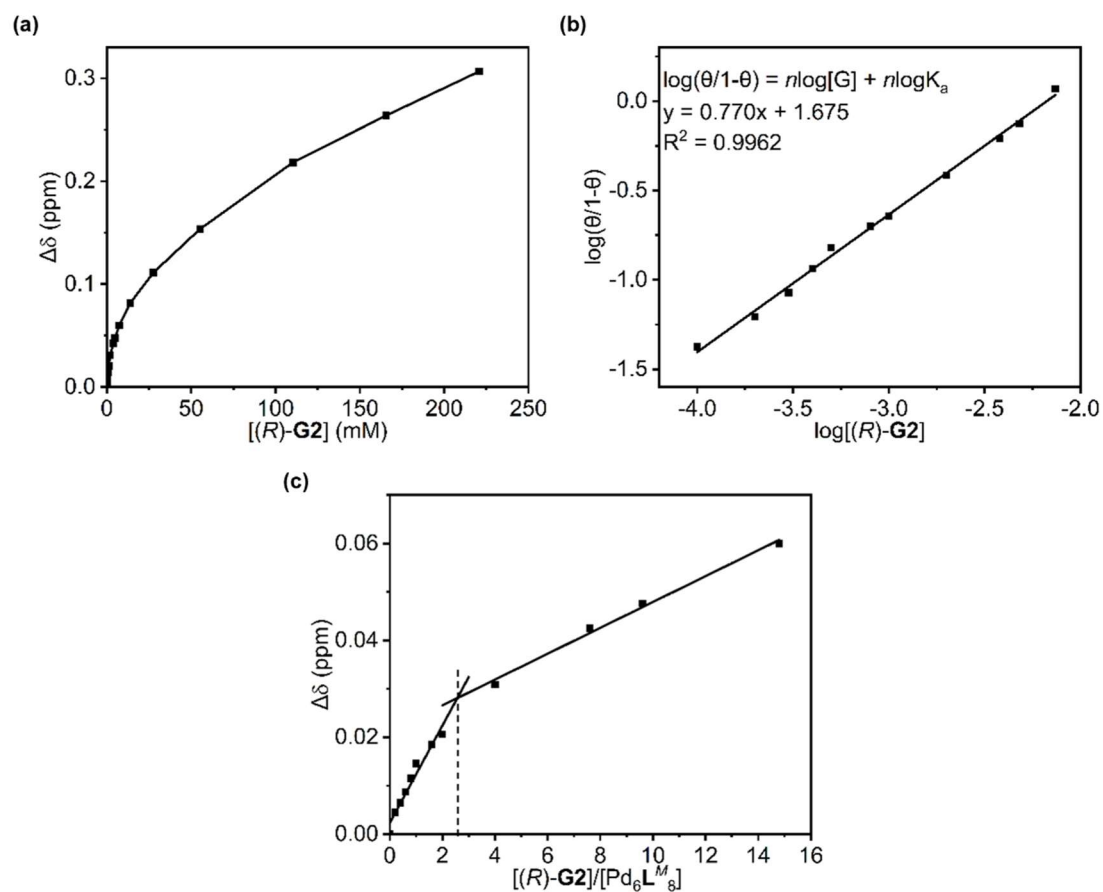

**Figure S45.** Titration Analysis. **(a)** Titration curves of (R)-G2 bound by 6DMSO@Pd<sub>6</sub>L<sub>8</sub>. **(b)** Hill function. **(c)** The stoichiometry was found to be three guest molecules per one host molecule using the mole ratio method.<sup>3</sup>

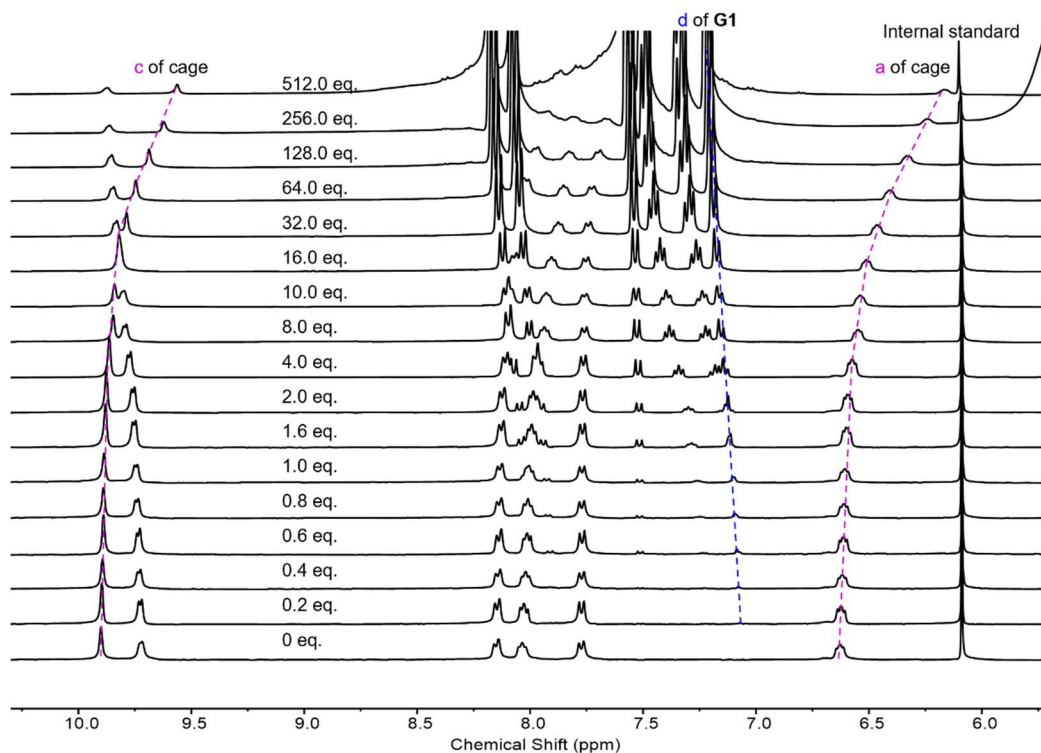

**Figure S46.**  $^1\text{H}$  NMR spectra upon addition of (S)-G2 into  $6\text{DMSO}@Pd_6L^M_8$  using 1,3,5-trimethoxybenzene as internal standard (400 MHz,  $\text{CD}_3\text{SOCD}_3$ , 25 °C).

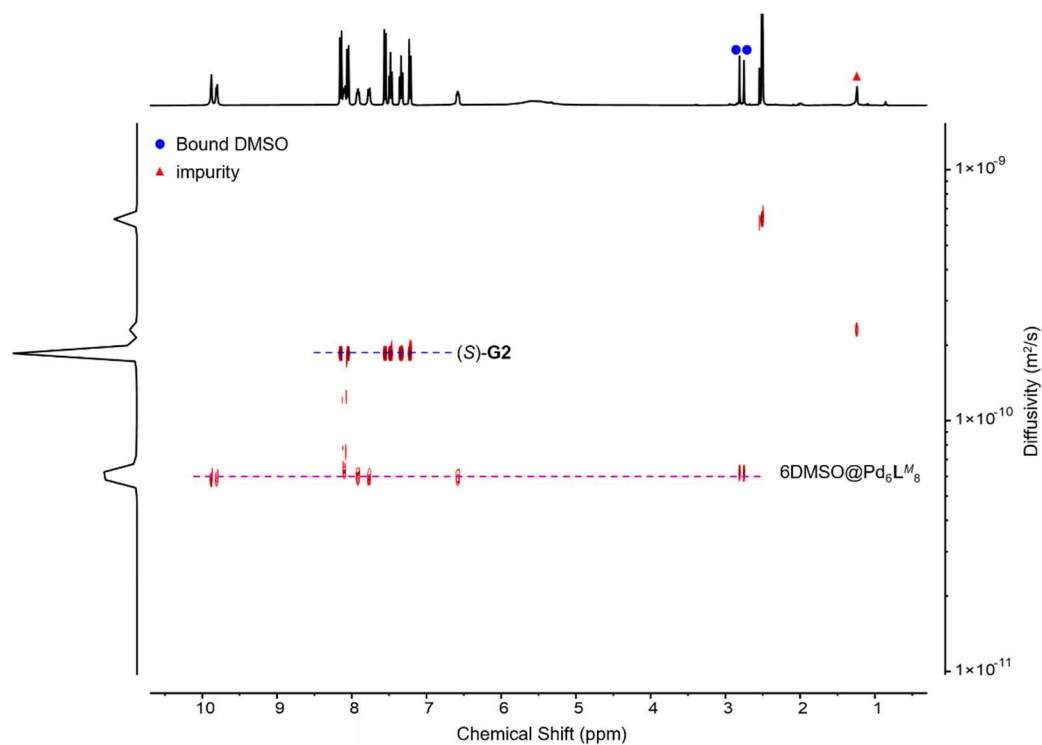

**Figure S47.**  $^1\text{H}$  DOSY spectrum of  $6\text{DMSO}@Pd_6L^M_8$  with 16.0 equiv of (S)-G2 (400 MHz,  $\text{CD}_3\text{SOCD}_3$ , 25 °C).

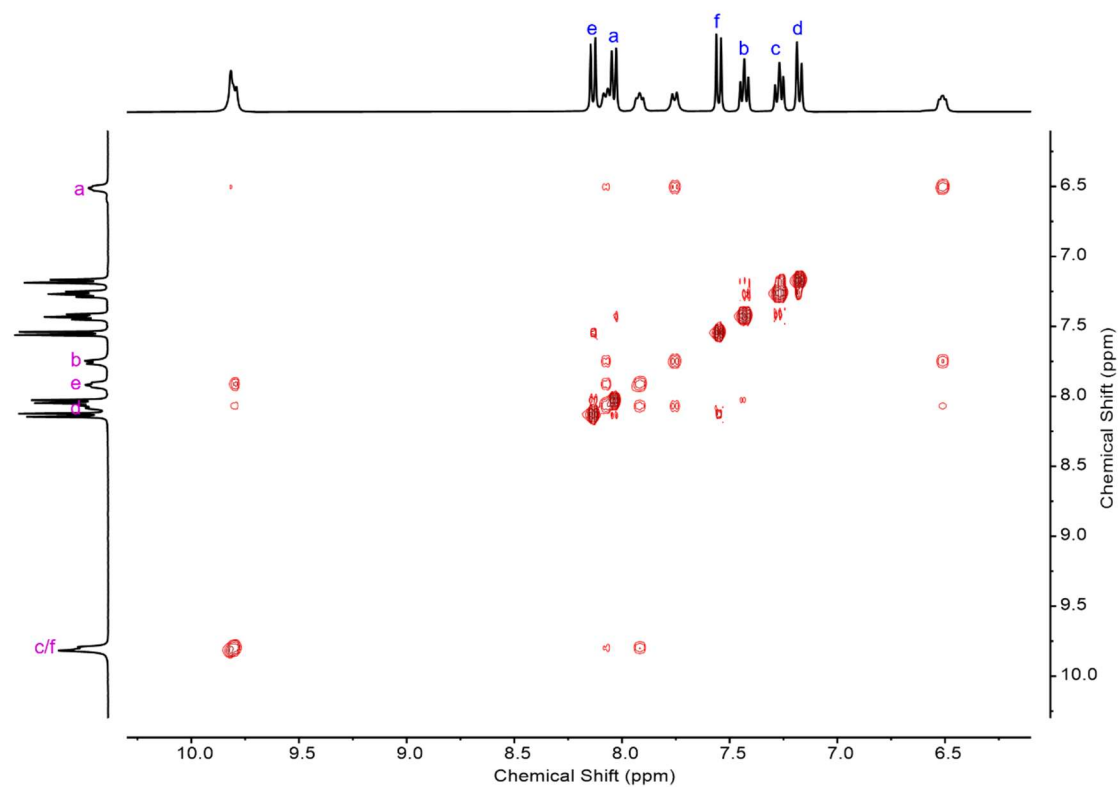

**Figure S48.**  $^1\text{H}$ - $^1\text{H}$  NOESY NMR spectrum of  $6\text{DMSO}@Pd_6L^M_8$  with 16.0 equiv of (S)-**G2** (400 MHz,  $\text{CD}_3\text{SOCD}_3$ , 25 °C). No intermolecular NOE correlations between the host and the guest were observed.

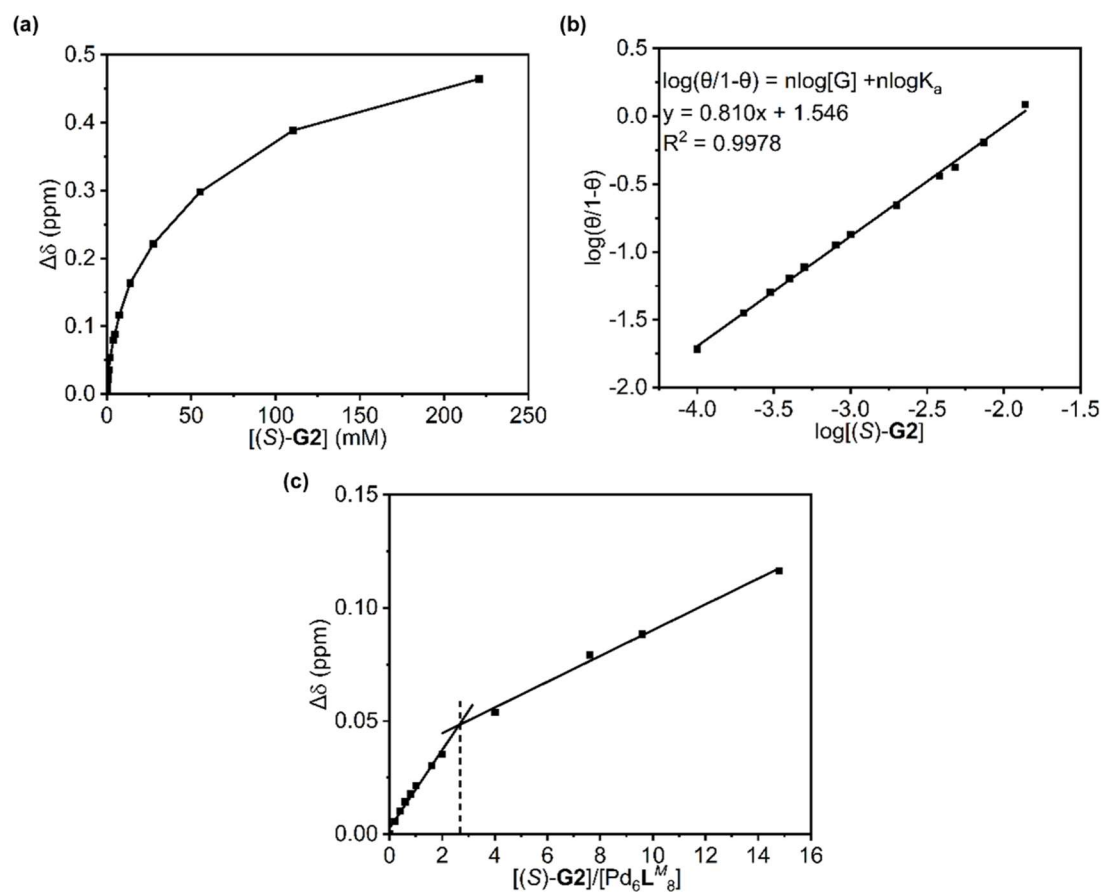

**Figure S49.** Titration Analysis. **(a)** Titration curves of (S)-G2 bound by Pd<sub>6</sub>L<sub>8</sub><sup>M</sup>. **(b)** Hill function. **(c)** The stoichiometry was found to be three guest molecules per one host molecule using the mole ratio method.<sup>3</sup>

## 5.5 NMR and Fluorescence Sensing of Guests by Hosts

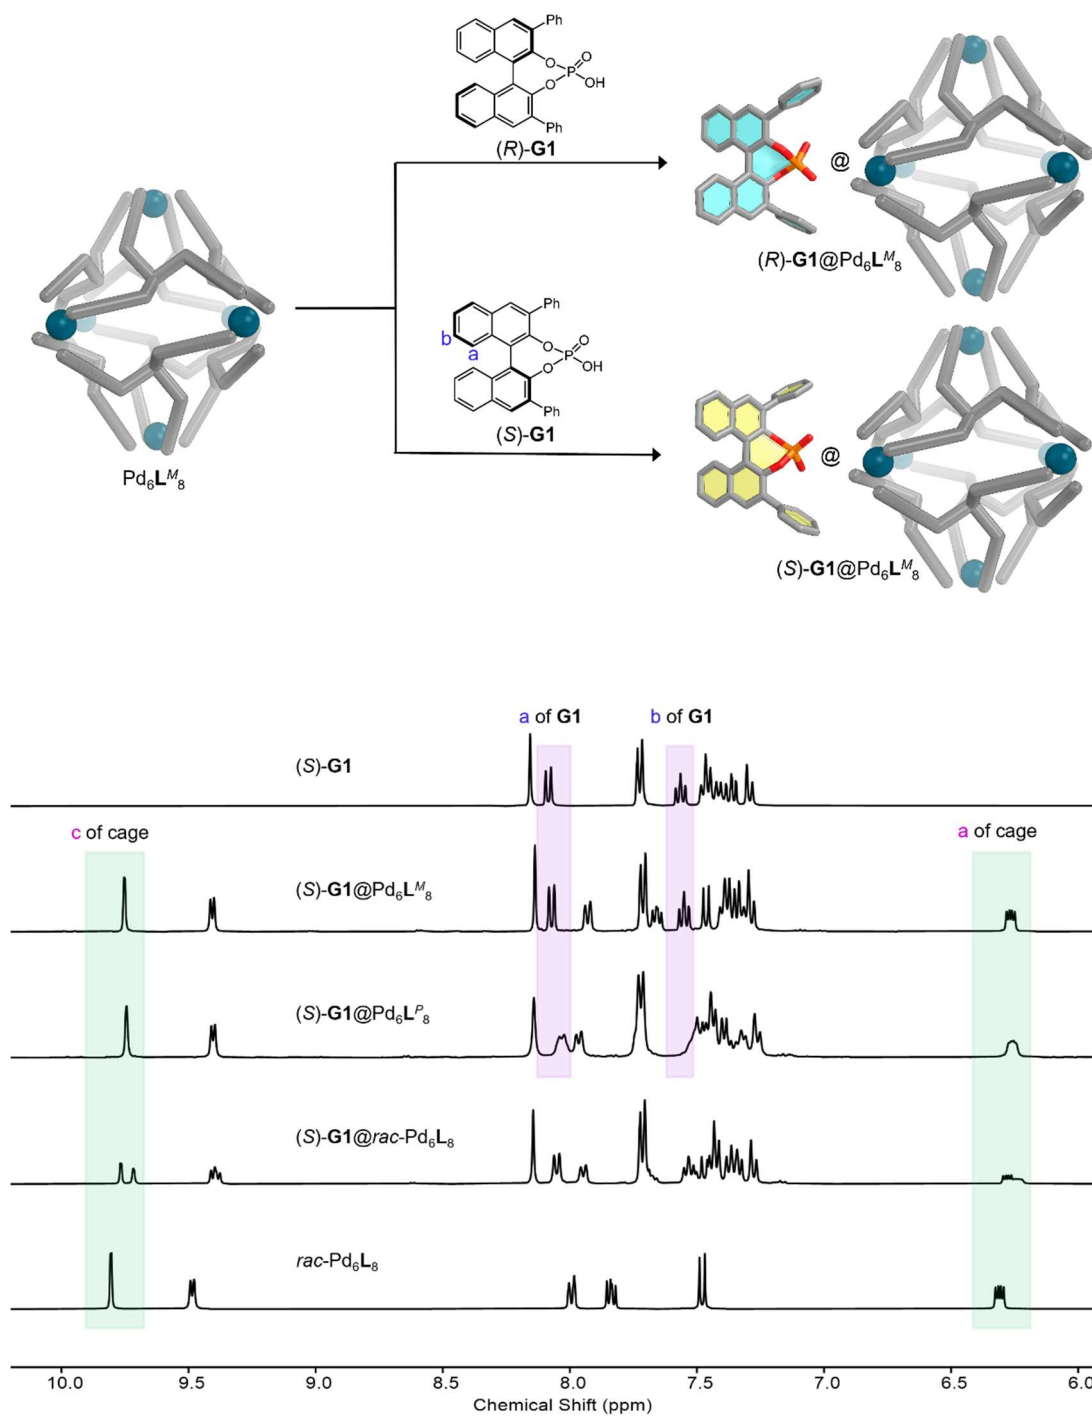

**Figure S50.** <sup>1</sup>H NMR spectra of *rac*-Pd<sub>6</sub>L<sub>8</sub>, (S)-G1@*rac*-Pd<sub>6</sub>L<sub>8</sub>, (S)-G1@Pd<sub>6</sub>L<sup>P</sup><sub>8</sub>, (S)-G1@Pd<sub>6</sub>L<sup>M</sup><sub>8</sub>, and (S)-G1 (theoretical stoichiometry: 10 equiv of (S)-G1 per cage) (400 MHz, CD<sub>3</sub>CN, 25 °C).

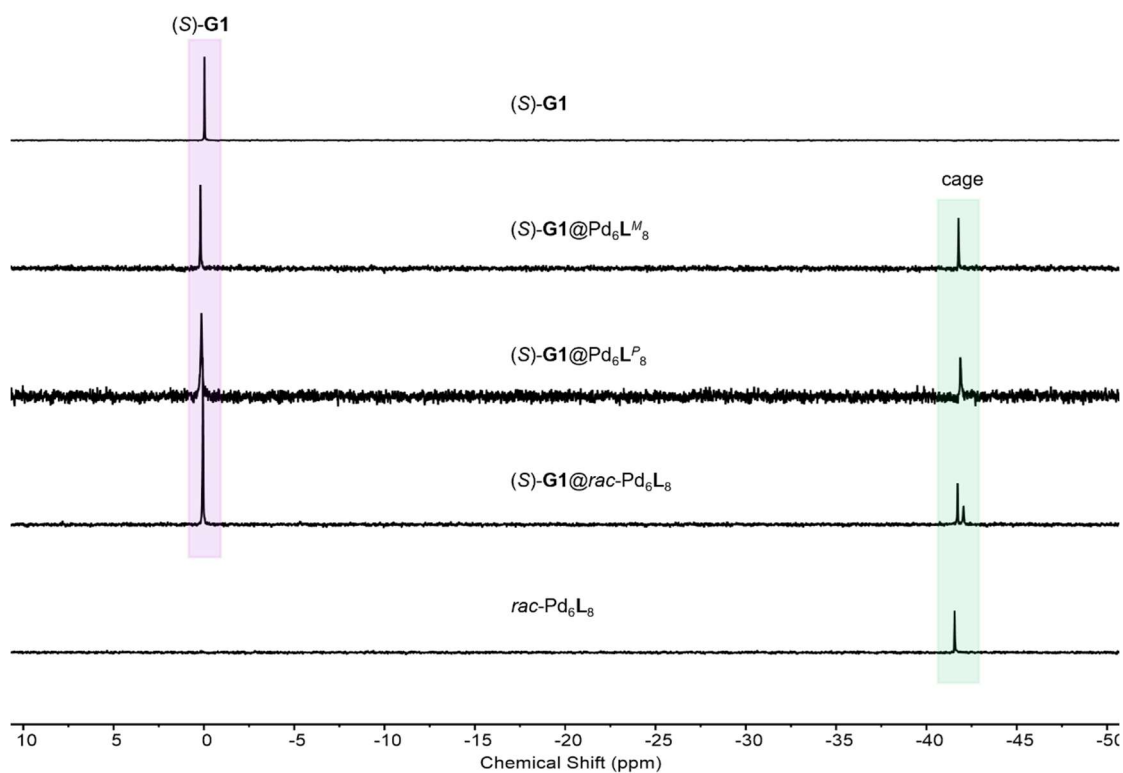

**Figure S51.**  $^{31}\text{P}$  NMR spectra of *rac*-Pd<sub>6</sub>L<sub>8</sub>, (S)-G1@*rac*-Pd<sub>6</sub>L<sub>8</sub>, (S)-G1@Pd<sub>6</sub>L<sup>P</sup><sub>8</sub>, (S)-G1@Pd<sub>6</sub>L<sup>M</sup><sub>8</sub>, and (S)-G1 (theoretical stoichiometry: 10 equiv of (S)-G1 per cage) (162 MHz, CD<sub>3</sub>CN, 25 °C).

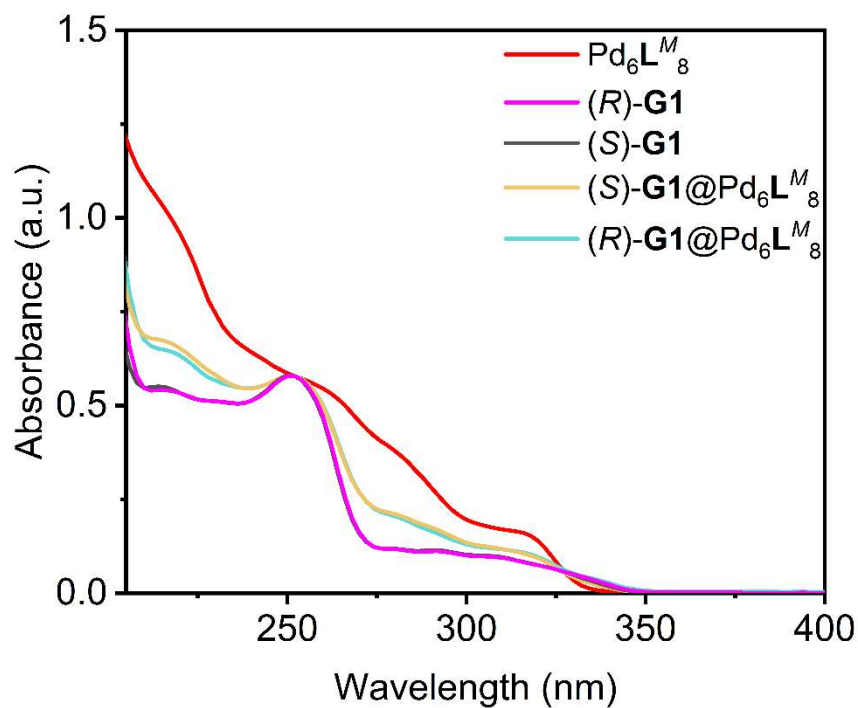

**Figure S52.** UV-vis spectra of Pd<sub>6</sub>L<sup>M</sup><sub>8</sub>, (R)-G1, (S)-G1, (R)-G1@Pd<sub>6</sub>L<sup>M</sup><sub>8</sub> (8:1 molar ratio), and (S)-G1@Pd<sub>6</sub>L<sup>M</sup><sub>8</sub> (8:1 molar ratio) in CH<sub>3</sub>CN.

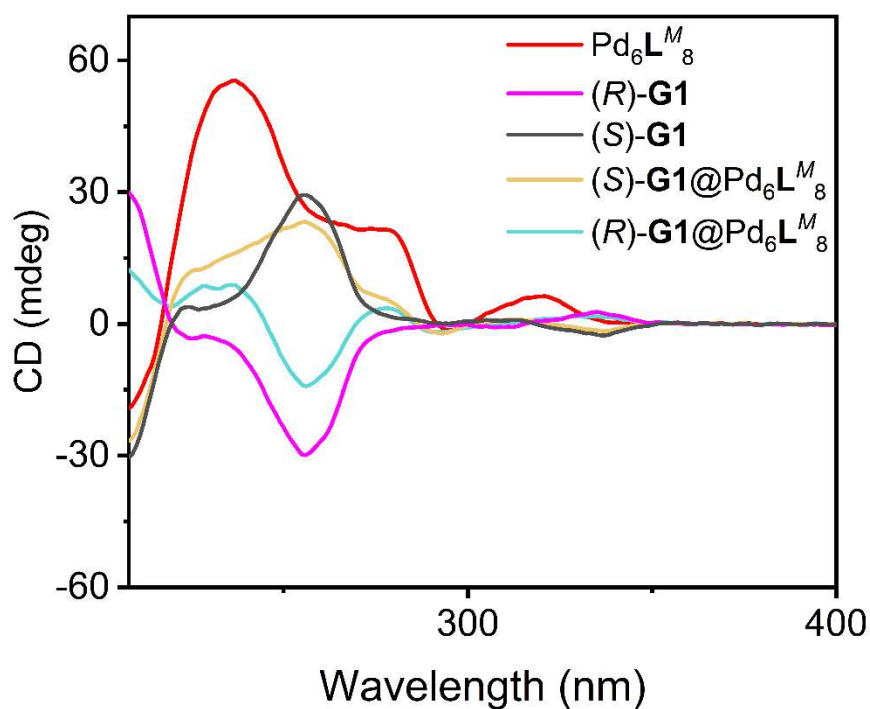

**Figure S53.** CD of spectra Pd<sub>6</sub>L<sup>M</sup><sub>8</sub>, (R)-G1, (S)-G1, (R)-G1@Pd<sub>6</sub>L<sup>M</sup><sub>8</sub> (8:1 molar ratio), and (S)-G1@Pd<sub>6</sub>L<sup>M</sup><sub>8</sub> (8:1 molar ratio) in CH<sub>3</sub>CN.

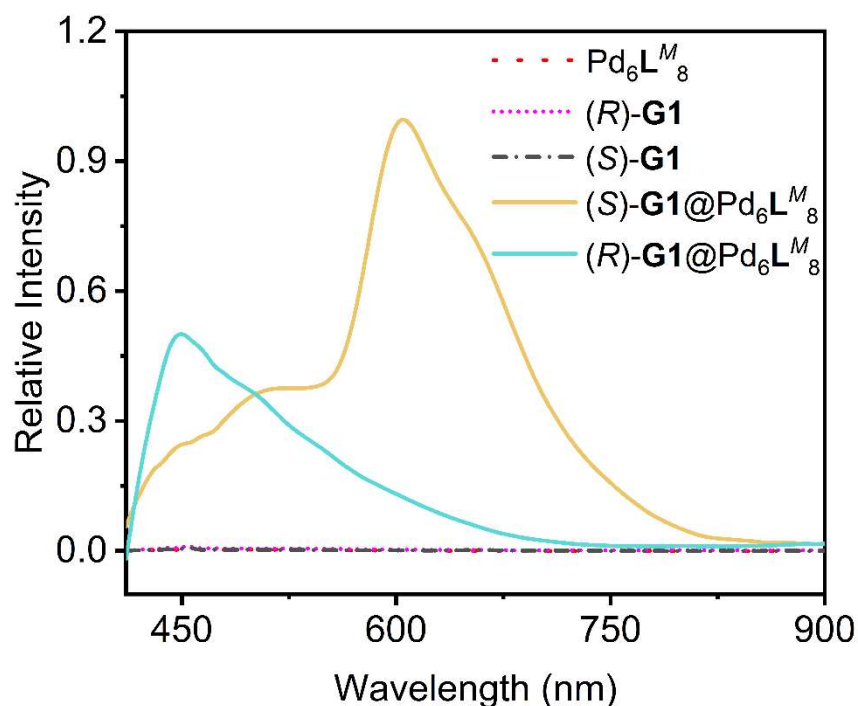

**Figure S54.** Fluorescence spectra of Pd<sub>6</sub>L<sup>M</sup><sub>8</sub> (0.15 mM), (R)-G1 (1.2 mM), (S)-G1 (1.2 mM), (R)-G1@Pd<sub>6</sub>L<sup>M</sup><sub>8</sub> (0.15mM Pd<sub>6</sub>L<sup>M</sup><sub>8</sub> + 1.2 mM (R)-G1), and (S)-G1@Pd<sub>6</sub>L<sup>M</sup><sub>8</sub> (0.15mM Pd<sub>6</sub>L<sup>M</sup><sub>8</sub> + 1.2 mM (S)-G1) in CH<sub>3</sub>CN ( $\lambda_{\text{ex}}$  = 400 nm).

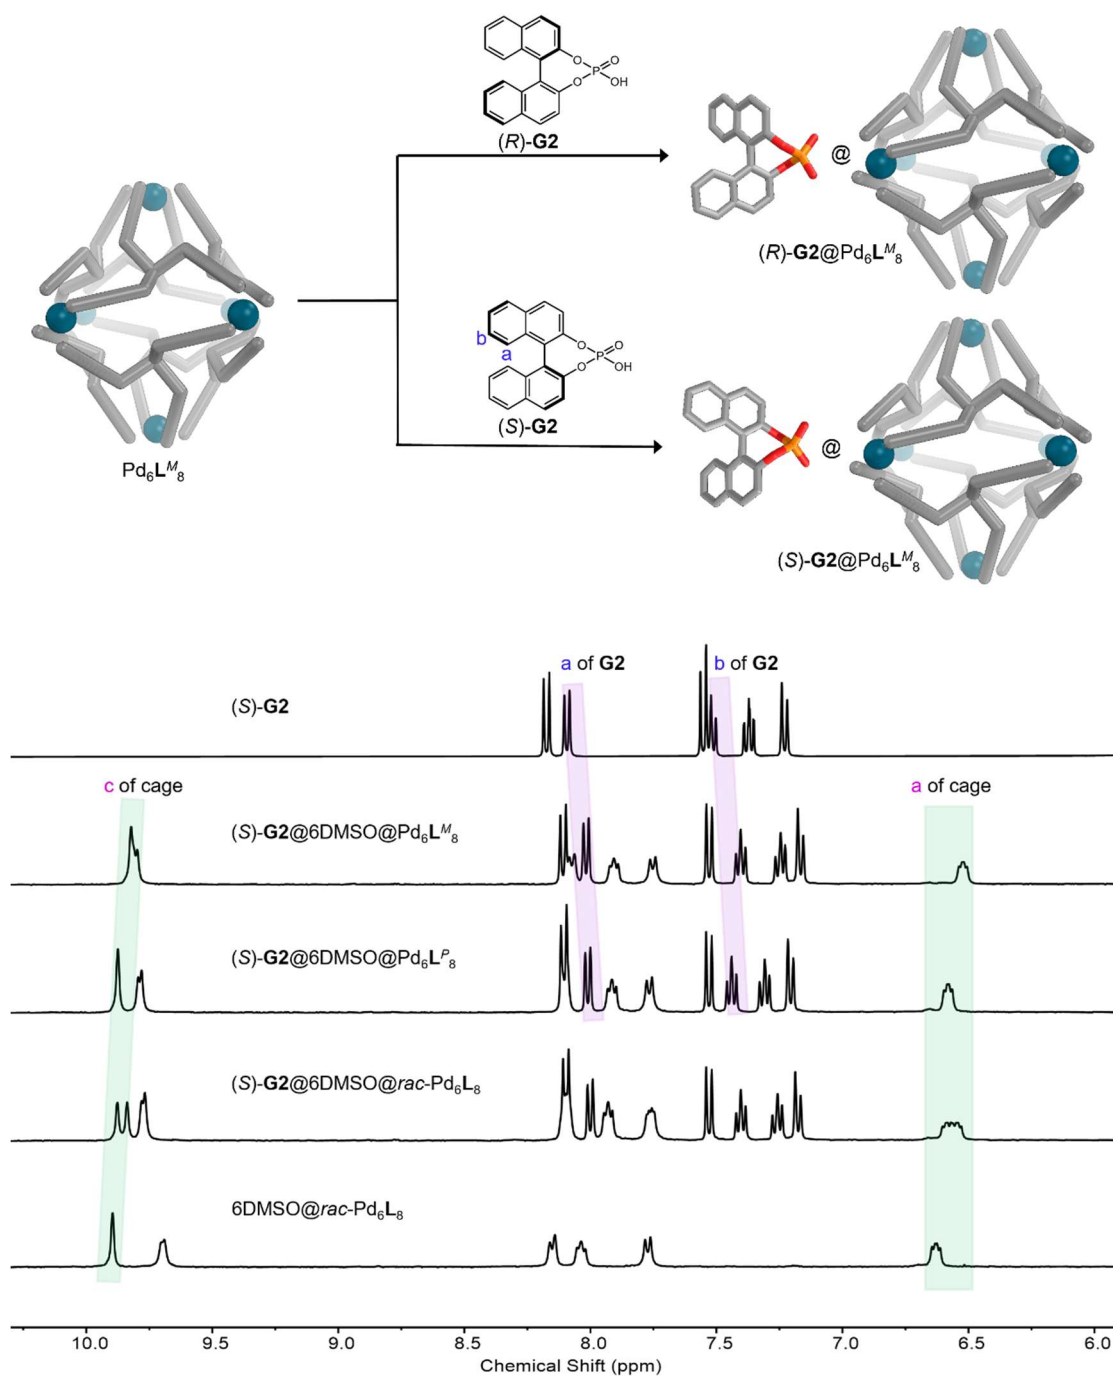

**Figure S55.** <sup>1</sup>H NMR spectra of 6DMSO@rac-Pd<sub>6</sub>L<sub>8</sub>, (S)-G2@6DMSO@rac-Pd<sub>6</sub>L<sub>8</sub>, (S)-G2@6DMSO@Pd<sub>6</sub>L<sup>P</sup><sub>8</sub>, (S)-G2@6DMSO@Pd<sub>6</sub>L<sup>M</sup><sub>8</sub>, and (S)-G2 (theoretical stoichiometry: 10 equiv of (S)-G2 per cage) (400 MHz, CD<sub>3</sub>SOCD<sub>3</sub>, 25 °C).

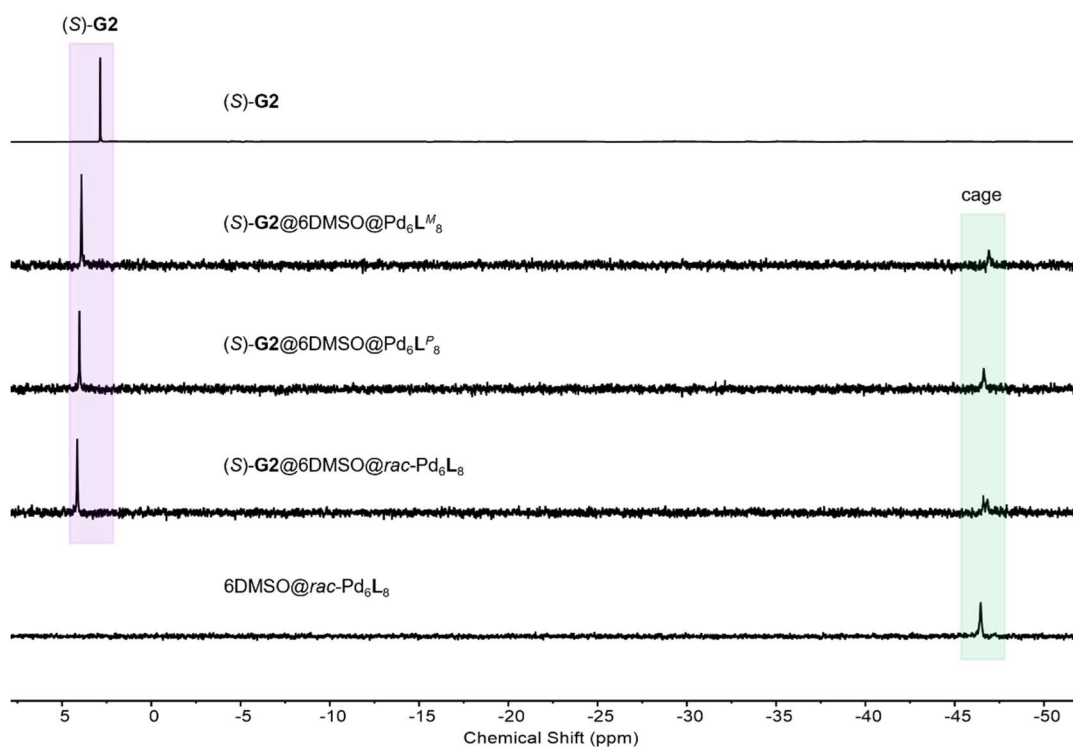

**Figure S56.**  $^{31}\text{P}$  NMR spectra of 6DMSO@rac-Pd<sub>6</sub>L<sub>8</sub>, (S)-G2@6DMSO@rac-Pd<sub>6</sub>L<sub>8</sub>, (S)-G2@6DMSO@Pd<sub>6</sub>L<sup>P</sup><sub>8</sub>, (S)-G2@6DMSO@Pd<sub>6</sub>L<sup>M</sup><sub>8</sub>, and (S)-G2 (theoretical stoichiometry: 10 equiv of (S)-G2 per cage) (162 MHz, CD<sub>3</sub>CN, 25 °C).

## 6 Volume Calculations

In order to determine the available void spaces within the structure of Pd<sub>6</sub>L<sub>8</sub> cages, MoloVol<sup>4</sup> calculations based on the crystal structures were performed. A probe with a radius of 2.2 Å was employed. The standard parameters are tabulated below, and the results are shown in Figure S57.

Probe mode: one probe

Probe radius: 2.2 Å

Grid resolution: 0.2 Å

Optimization depth: 4

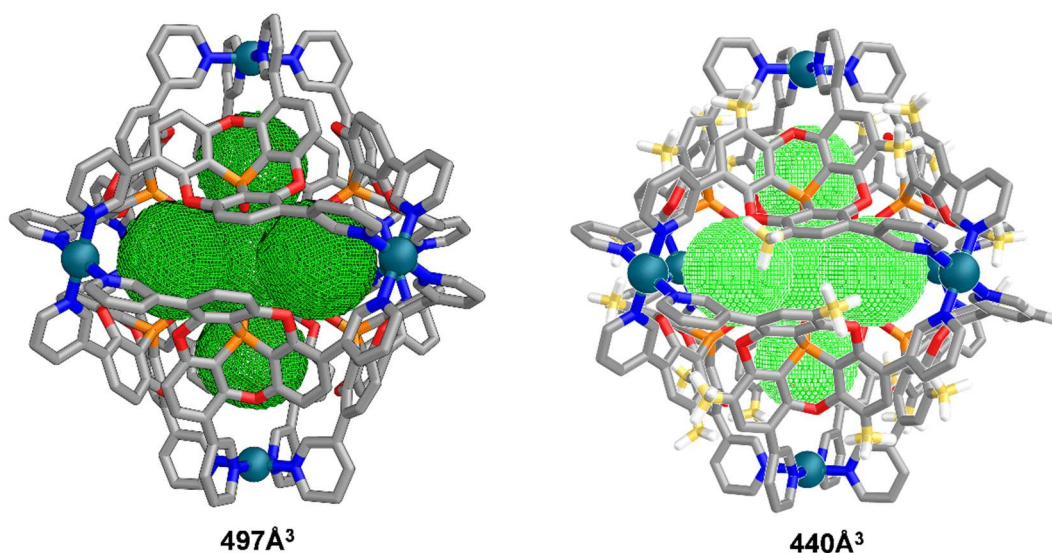

**Figure S57.** MoloVol-calculated void space (forest and green mesh) within the crystal structure of Pd<sub>6</sub>L<sub>8</sub> cages.

## 7 Possible Stereoisomers Analysis

The total number of theoretically possible stereoisomers for  $\text{Pd}_6\text{L}_8$  is 2916 when both ligand helicity and concave–convex orientation are taken into account (Table S2).

**Table S2.** Number of possible stereoisomers.

| Point Symmetry | Number |
|----------------|--------|
| $C_1$          | 2606   |
| $C_2$          | 162    |
| $C_3$          | 114    |
| $D_3$          | 12     |
| $C_4$          | 6      |
| $D_2$          | 6      |
| $T_d$          | 6      |
| $O$            | 4      |

When all convex faces are oriented outward,  $\text{Pd}_6\text{L}_8$  can adopt 23 distinct stereoisomers, identical to the number of isomers possible for cages with inward-oriented convex faces (Figure S58). In this context, *exo* denotes structures in which all convex faces are oriented toward the exterior of the cage cavity, whereas *endo* refers to structures with convex faces directed inward.

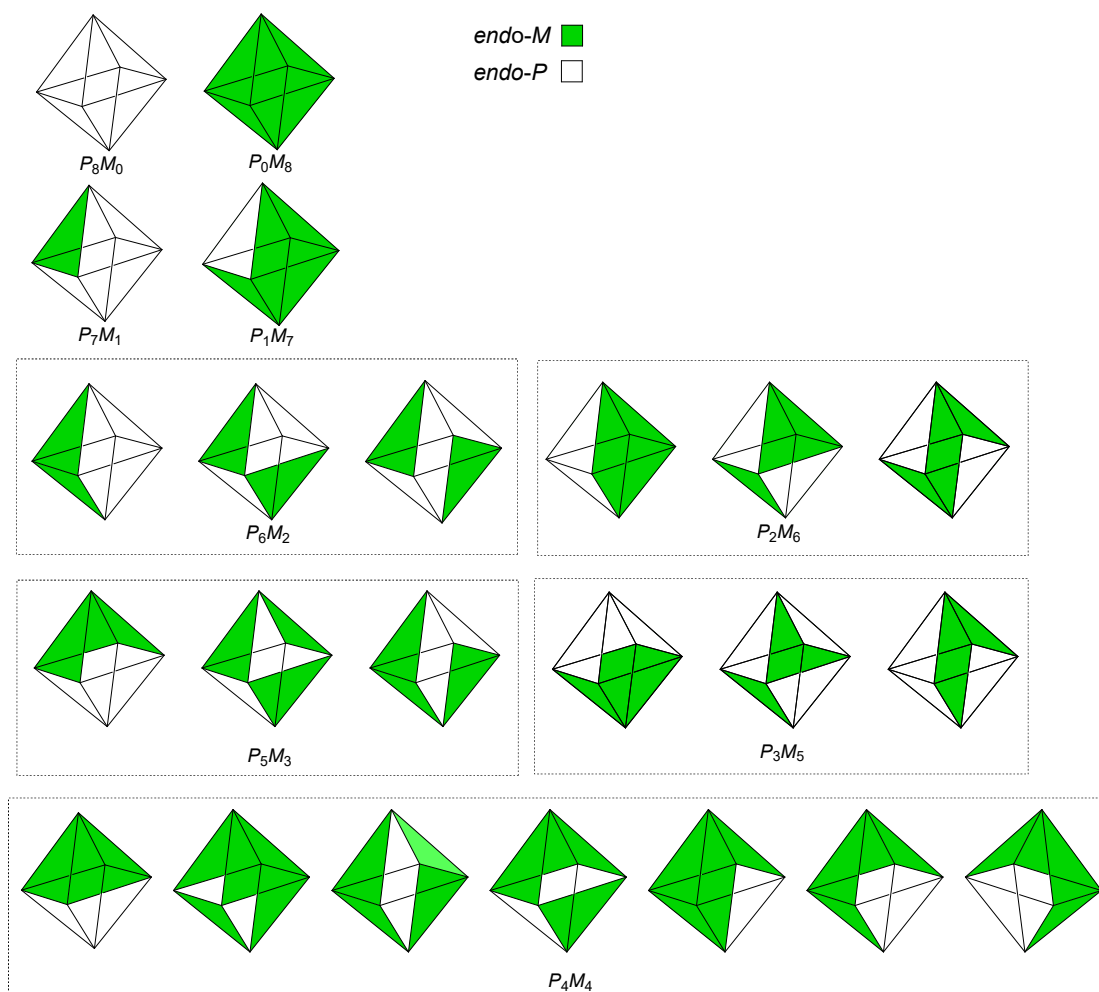

**Figure S58.** Possible stereoisomers for *endo*-Pd<sub>6</sub>L<sub>8</sub>.

## 8 Computational Studies

All quantum chemical calculations in this study were performed using the ORCA 6.1.0 software suite.<sup>5</sup> To balance computational efficiency and accuracy for the large metallocsupramolecular cages, a stepwise protocol was employed. Initial geometry optimization and frequency analysis were carried out at the GFN2-xTB semiempirical level.<sup>6</sup> Subsequently, high-precision single-point energy calculations were conducted at the density functional theory (DFT) level using the  $r^2$ SCAN-3c composite method,<sup>7</sup> with the conductor-like polarizable continuum model (CPCM)<sup>8</sup> and dimethyl sulfoxide (DMSO) as the solvent to emulate experimental conditions. Finally, non-covalent interactions were analyzed by performing reduced density gradient (RDG) calculations on the converged electron densities using the Multiwfn software.<sup>9</sup>

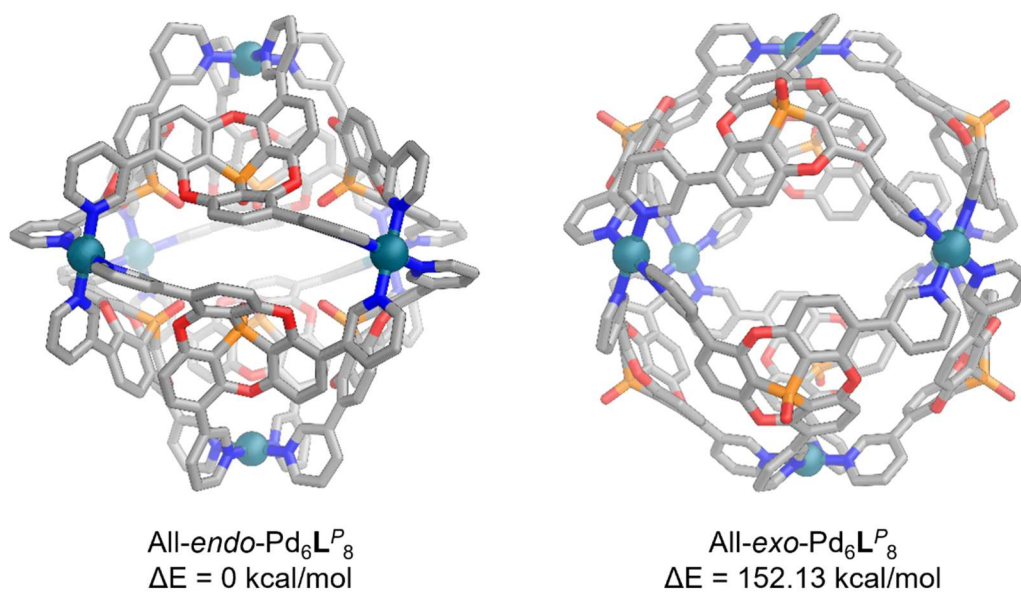

**Figure S59.** Optimized structures and relative electronic energies of the all-*endo* and all-*exo* conformational isomers. Energies were calculated at the  $r^2$ SCAN-3c/DFT level using the CPCM solvation model (DMSO) on the GFN2-xTB pre-optimized geometries.

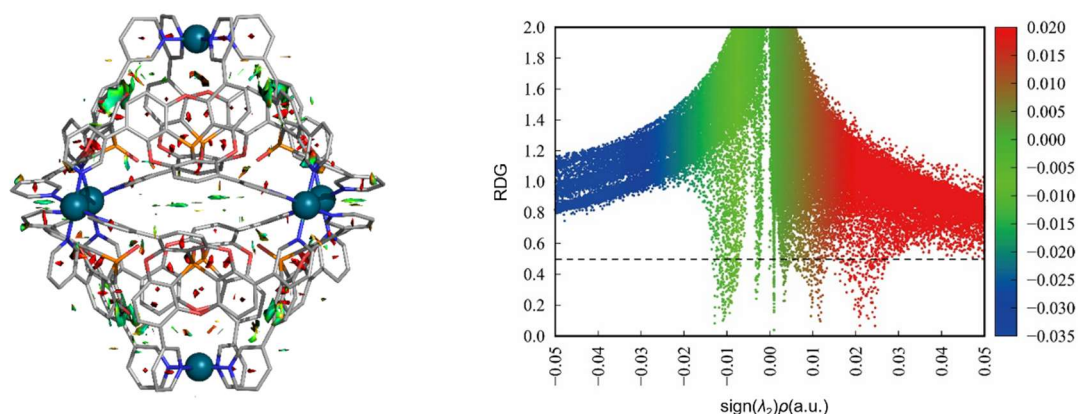

**Figure S60.** Reduced density gradient (RDG) isosurface map of all-*endo*-Pd<sub>6</sub>L<sup>P</sup><sub>8</sub> (left); RDG scatter diagrams of all-*endo*-Pd<sub>6</sub>L<sup>P</sup><sub>8</sub> (right).

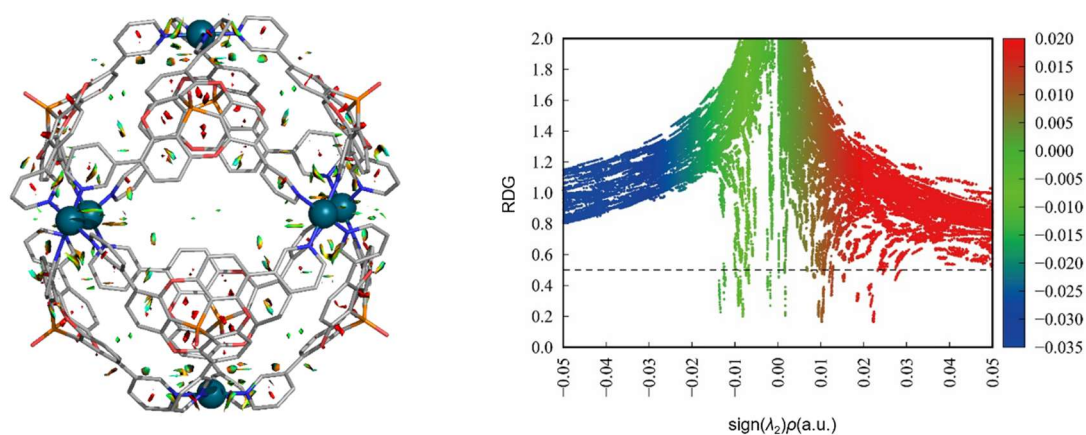

**Figure S61.** Reduced density gradient (RDG) isosurface map of all-*exo*-Pd<sub>6</sub>L<sup>P</sup><sub>8</sub> (left); RDG scatter diagrams of all-*exo*-Pd<sub>6</sub>L<sup>P</sup><sub>8</sub> (right).

The GFN2-xTB-optimized Cartesian coordinates of all-*endo*-Pd<sub>6</sub>L<sup>P</sup><sub>8</sub> and all-*exo*-Pd<sub>6</sub>L<sup>P</sup><sub>8</sub> are shown in Tables S3 and S4, respectively.

**Table S3.** Cartesian coordinates of all-*endo*-Pd<sub>6</sub>L<sup>P</sup><sub>8</sub>.

|    |           |           |           |   |           |           |           |
|----|-----------|-----------|-----------|---|-----------|-----------|-----------|
| Pd | 22.326700 | 16.939300 | 7.435840  | C | 31.382600 | 8.569360  | 0.898784  |
| Pd | 22.327000 | -1.562000 | 7.435630  | C | 32.457700 | 7.141590  | 11.009300 |
| Pd | 14.608900 | 7.687880  | 2.332400  | C | 28.551300 | 2.395840  | 9.542110  |
| Pd | 17.225800 | 7.688380  | 15.149400 | C | 31.277300 | 8.980450  | 2.209960  |
| N  | 23.566700 | 16.956700 | 8.996280  | C | 25.817700 | 1.335770  | 11.754400 |
| N  | 20.766000 | 16.955500 | 8.675250  | C | 21.069400 | 6.307960  | 16.302500 |
| N  | 22.859500 | -1.577000 | 5.514970  | C | 26.976500 | 1.920540  | 12.219800 |
| N  | 20.406400 | -1.578430 | 6.902850  | C | 26.864800 | -1.611910 | 8.887820  |
| N  | 16.702400 | 5.793350  | 14.823000 | C | 22.727600 | 11.939800 | 2.232770  |

|   |           |           |           |   |           |           |           |
|---|-----------|-----------|-----------|---|-----------|-----------|-----------|
| N | 14.937800 | 5.792910  | 1.810280  | C | 25.241200 | 18.135600 | 4.626320  |
| N | 29.014100 | 8.304860  | 14.129200 | C | 17.096500 | 8.980490  | -1.519990 |
| N | 14.254200 | 9.583050  | 2.837280  | C | 26.378500 | 12.272000 | -1.038940 |
| N | 15.636400 | 8.304890  | 14.117000 | C | 26.106800 | -2.762890 | 8.881490  |
| N | 17.732100 | 9.583570  | 15.502000 | C | 19.518000 | 18.138500 | 4.522780  |
| N | 25.857500 | 7.070110  | -1.342080 | C | 30.800100 | 12.273700 | 11.488900 |
| N | 13.551000 | 7.070620  | 3.904540  | C | 21.023800 | 6.398430  | 17.720400 |
| C | 18.414300 | 14.516700 | 10.167600 | C | 27.357900 | 11.635900 | -1.770590 |
| C | 24.770200 | 15.783600 | 10.707600 | C | 31.533300 | 11.638400 | 12.467800 |
| C | 24.079300 | 13.516700 | 11.506200 | C | 19.858800 | 6.811030  | 18.330200 |
| C | 16.021000 | 10.120400 | 10.250400 | C | 33.225800 | 6.807160  | 9.907040  |
| C | 14.809400 | 11.530800 | 4.122340  | C | 28.825500 | 3.736890  | -0.795690 |
| C | 25.578500 | 9.444590  | 14.905300 | C | 28.535500 | 3.101740  | 0.392514  |
| C | 25.148800 | 10.123000 | 13.742200 | C | 30.559600 | 3.738610  | 13.936800 |
| C | 19.052200 | 15.782600 | 9.875270  | C | 29.371800 | 3.103310  | 13.645800 |
| C | 19.018000 | 11.530300 | 14.945400 | C | 32.616400 | 6.394020  | 8.742080  |
| C | 18.252100 | 13.517100 | 9.181750  | C | 24.558000 | 15.842700 | 5.923940  |
| C | 15.747400 | 8.715470  | 12.861200 | C | 23.841700 | 15.847200 | 9.668220  |
| C | 14.146500 | 6.660600  | 5.016090  | C | 20.092700 | 15.846300 | 8.948180  |
| C | 20.025800 | 12.125700 | 14.094100 | C | 20.813200 | 15.843500 | 5.203080  |
| C | 14.858200 | 9.442230  | 10.681000 | C | 25.968800 | 10.181400 | 0.063050  |
| C | 22.847800 | -0.467533 | 4.789020  | C | 27.681300 | 5.192870  | 1.198890  |
| C | 25.755800 | 11.965500 | 12.374100 | C | 28.565900 | 5.194170  | 12.790500 |
| C | 24.585300 | 9.117380  | 15.843400 | C | 29.699200 | 10.182300 | 11.081100 |
| C | 23.788900 | 10.225500 | 13.499500 | C | 14.952800 | 10.183100 | 3.791130  |
| C | 17.954700 | 14.205700 | 11.458000 | C | 16.089800 | 5.194440  | 2.080400  |
| C | 19.679900 | -0.469356 | 6.914660  | C | 16.972600 | 5.194020  | 13.671500 |
| C | 16.099000 | 13.457900 | 5.028230  | C | 18.686800 | 10.182500 | 14.803500 |
| C | 17.388700 | 11.962800 | 10.857700 | C | 23.846900 | 14.040000 | 2.092060  |
| C | 21.831300 | 13.267500 | 12.226800 | C | 24.731000 | 13.455400 | 1.209990  |
| C | 15.423800 | 5.256610  | 7.310480  | C | 20.178000 | 12.245300 | 2.976040  |
| C | 14.658000 | 9.071440  | 12.065600 | C | 19.592300 | 14.513200 | 3.526020  |
| C | 17.657800 | 0.859715  | 6.448960  | C | 19.923000 | 13.455400 | 13.652900 |
| C | 24.745900 | 6.660480  | -0.746497 | C | 20.807200 | 14.040000 | 12.771000 |
| C | 20.030800 | 5.460560  | 0.793938  | C | 25.063800 | 14.518000 | 11.345400 |
| C | 26.962700 | 9.072860  | 15.106400 | C | 28.988900 | 12.124800 | 9.741680  |
| C | 16.711100 | 3.846540  | 13.421900 | C | 27.667000 | 14.039000 | 8.958330  |
| C | 24.198100 | 18.110200 | 9.329650  | C | 30.728600 | 9.110850  | 5.184870  |
| C | 27.758800 | 8.716710  | 14.017400 | C | 28.384300 | 10.216900 | 5.983620  |
| C | 15.686700 | 5.459990  | 9.731070  | C | 16.980700 | 14.042900 | 5.912360  |
| C | 26.353800 | 14.208900 | 11.807600 | C | 15.660200 | 12.127300 | 5.129730  |
| C | 22.451400 | 5.257660  | 0.531153  | C | 16.262200 | 10.223700 | 8.890370  |
| C | 25.438800 | 16.992400 | 11.043000 | C | 13.919200 | 9.115140  | 9.688820  |
| C | 15.312100 | 9.918300  | 7.920820  | C | 17.864700 | 12.248900 | 9.581920  |

|   |           |           |           |   |           |           |           |
|---|-----------|-----------|-----------|---|-----------|-----------|-----------|
| C | 18.359600 | -0.405908 | 6.468230  | C | 24.480500 | 12.249500 | 11.895700 |
| C | 22.560000 | 3.130440  | 2.490600  | H | 16.753800 | 8.738870  | 12.448100 |
| C | 14.185300 | 5.935020  | 7.370760  | H | 15.234200 | 6.637140  | 5.000460  |
| C | 23.309900 | -2.730230 | 4.960340  | H | 22.491100 | 0.431676  | 5.287160  |
| C | 17.527800 | 13.270200 | 6.934760  | H | 24.902100 | 8.663480  | 16.768600 |
| C | 20.432400 | 18.108600 | 9.307210  | H | 18.004300 | 14.980100 | 12.206300 |
| C | 21.295400 | 5.154830  | 1.287140  | H | 20.177600 | 0.429899  | 7.271930  |
| C | 16.179800 | 5.153910  | 8.466510  | H | 15.702700 | 14.054800 | 4.222650  |
| C | 14.105300 | 9.366460  | 8.345830  | H | 24.761700 | 6.636810  | 0.341300  |
| C | 23.546400 | 3.415380  | 1.551540  | H | 23.936900 | 18.993700 | 8.752610  |
| C | 18.716600 | 16.991000 | 10.544700 | H | 27.346500 | 8.741310  | 13.010700 |
| C | 22.391100 | 5.935380  | -0.707612 | H | 27.101300 | 14.984200 | 11.758700 |
| C | 23.293600 | -0.403705 | 3.468570  | H | 26.156300 | 17.007800 | 11.847200 |
| C | 23.313200 | 0.862144  | 2.767150  | H | 23.296900 | -3.613750 | 5.593690  |
| C | 18.111700 | 2.108150  | 9.769370  | H | 21.010400 | 18.992000 | 9.047600  |
| C | 14.407700 | 8.234560  | 14.687800 | H | 13.338500 | 9.136950  | 7.622690  |
| C | 17.699900 | 3.435390  | 9.838890  | H | 17.911500 | 17.006200 | 11.261200 |
| C | 17.100600 | 3.250730  | 12.161700 | H | 14.368000 | 7.896040  | 15.720100 |
| C | 17.895700 | 1.860100  | 7.418640  | H | 12.736000 | 6.716320  | 8.722800  |
| C | 13.711400 | 6.262670  | 8.651810  | H | 25.026400 | 0.397071  | 1.588970  |
| C | 24.319300 | 1.172150  | 1.837170  | H | 16.479500 | 0.395137  | 4.735790  |
| C | 16.442800 | 3.413330  | 6.215890  | H | 17.495700 | 1.323490  | 12.979800 |
| C | 22.343900 | 1.862740  | 3.005180  | H | 24.121200 | -1.627370 | 1.875920  |
| C | 18.808800 | 3.985220  | 2.195450  | H | 24.125200 | -3.695310 | 3.240610  |
| C | 16.727900 | 1.170100  | 5.442950  | H | 25.195900 | 2.575830  | 0.470528  |
| C | 22.818400 | 9.919550  | 14.448400 | H | 15.919800 | 5.617750  | 16.747100 |
| C | 16.120900 | 11.394600 | 6.247150  | H | 21.038700 | 6.715630  | -2.157350 |
| C | 17.544600 | 1.920320  | 12.083300 | H | 18.300600 | 0.297075  | 10.900300 |
| C | 16.340200 | 3.846940  | 1.819610  | H | 18.981700 | 6.240710  | -0.904684 |
| C | 19.923400 | 3.437620  | 2.808910  | H | 13.988800 | 6.241710  | 10.780000 |
| C | 23.777300 | -1.612280 | 2.897350  | H | 30.615700 | 7.893680  | 15.398700 |
| C | 23.771300 | -2.763210 | 3.655380  | H | 20.486200 | -3.615010 | 6.464860  |
| C | 24.432300 | 2.395280  | 1.210710  | H | 17.042700 | 12.800800 | 12.800000 |
| C | 16.125000 | 5.082190  | 15.823500 | H | 22.518800 | 9.138680  | 16.422200 |
| C | 21.109900 | 6.262220  | -1.181830 | H | 12.781300 | 9.757240  | 1.372290  |
| C | 21.144300 | 11.393300 | 13.635800 | H | 27.696300 | 12.806500 | 12.722800 |
| C | 18.009700 | 1.335510  | 10.924500 | H | 26.833300 | 7.478510  | -3.138270 |
| C | 19.947800 | 6.011710  | -0.483161 | H | 29.349700 | 8.499690  | 17.462500 |
| C | 14.409900 | 6.011930  | 9.813970  | H | 16.265800 | 9.760130  | 16.973300 |
| C | 29.583700 | 8.233170  | 15.358400 | H | 13.014000 | 5.615930  | 1.027190  |
| C | 19.852500 | -2.731770 | 6.451870  | H | 12.303400 | 8.501730  | 14.455000 |
| C | 17.423200 | 12.982100 | 11.807100 | H | 11.754700 | 7.479120  | 2.928720  |
| C | 23.242500 | 9.368250  | 15.655900 | H | 15.361800 | 2.574210  | 4.566110  |
| C | 17.381600 | 3.127990  | 7.202340  | H | 12.494100 | 9.258020  | 12.103400 |

|    |           |           |           |   |           |           |           |
|----|-----------|-----------|-----------|---|-----------|-----------|-----------|
| C  | 13.331300 | 10.293400 | 2.141590  | H | 18.863100 | 0.299083  | 3.410590  |
| C  | 26.703800 | 12.986200 | 12.340400 | H | 16.783400 | 1.324320  | 2.604540  |
| C  | 25.899300 | 7.140970  | -2.696110 | H | 16.767900 | -1.630090 | 5.639390  |
| C  | 19.993200 | 2.110610  | 3.221390  | H | 19.169700 | 19.073700 | 10.731300 |
| C  | 17.600700 | 3.251920  | 2.209400  | H | 26.998900 | 9.258300  | 17.270500 |
| C  | 13.457300 | 6.305180  | 6.175820  | H | 18.496600 | 13.316500 | 16.066300 |
| C  | 28.870700 | 8.567730  | 16.497100 | H | 18.133600 | -3.697240 | 5.635290  |
| C  | 17.086900 | 3.983690  | 10.953400 | H | 25.623300 | 19.075500 | 10.590900 |
| C  | 17.121600 | 11.943000 | 7.032180  | H | 13.685900 | 13.315400 | 3.601110  |
| C  | 17.035900 | 10.295400 | 16.423400 | H | 22.770000 | 6.120740  | -3.440420 |
| C  | 13.937700 | 5.080950  | 1.232960  | H | 16.724600 | 12.180600 | 17.373300 |
| C  | 13.268600 | 8.569040  | 13.975400 | H | 12.379100 | 12.177500 | 1.830290  |
| C  | 12.196900 | 7.141220  | 3.862630  | H | 24.858000 | 6.875560  | -4.539640 |
| C  | 16.101600 | 2.393360  | 5.329980  | H | 10.353400 | 6.876450  | 4.904160  |
| C  | 13.372000 | 8.982110  | 12.664700 | H | 15.370100 | 3.197690  | 16.481100 |
| C  | 18.838500 | 1.337390  | 3.119300  | H | 15.880700 | 2.061260  | 14.339500 |
| C  | 23.585900 | 6.305590  | -1.435620 | H | 13.281400 | 3.195750  | 0.478846  |
| C  | 17.679600 | 1.921630  | 2.653720  | H | 15.423800 | 2.060900  | 0.989549  |
| C  | 17.789200 | -1.614510 | 5.983850  | H | 11.452600 | 6.119220  | 6.991490  |
| C  | 21.929800 | 11.941000 | 12.635000 | H | 27.895600 | 8.732930  | 2.422860  |
| C  | 19.412300 | 18.141700 | 10.242700 | H | 29.420800 | 6.639120  | 9.869490  |
| C  | 27.560600 | 8.982280  | 16.392900 | H | 22.164300 | 0.430314  | 9.584130  |
| C  | 18.275600 | 12.274300 | 15.902400 | H | 19.753900 | 8.660400  | -1.896420 |
| C  | 18.547700 | -2.765080 | 5.989860  | H | 26.644400 | 14.971100 | 2.665410  |
| C  | 25.135200 | 18.143200 | 10.348400 | H | 24.475400 | 0.431501  | 7.599870  |
| C  | 13.850900 | 12.273400 | 3.380330  | H | 28.946600 | 14.053100 | 10.646900 |
| C  | 23.631300 | 6.395600  | -2.853600 | H | 19.893700 | 6.638260  | 14.525400 |
| C  | 17.295700 | 11.638900 | 16.634100 | H | 20.715200 | 18.989800 | 6.118970  |
| C  | 13.119400 | 11.636800 | 2.401100  | H | 17.309300 | 8.738260  | 1.862250  |
| C  | 24.796200 | 6.808000  | -3.463650 | H | 17.553600 | 14.976800 | 3.115860  |
| C  | 11.429300 | 6.807410  | 4.965490  | H | 18.498000 | 17.002300 | 3.023660  |
| C  | 15.828400 | 3.738950  | 15.666700 | H | 21.356000 | -3.614620 | 9.277810  |
| C  | 16.118900 | 3.103170  | 14.479000 | H | 23.645900 | 18.990000 | 5.822390  |
| C  | 14.095500 | 3.737760  | 0.936665  | H | 31.309700 | 9.133840  | 7.250820  |
| C  | 15.283600 | 3.102740  | 1.227610  | H | 26.738900 | 16.996400 | 3.607640  |
| C  | 12.039300 | 6.394740  | 6.130340  | H | 30.285700 | 7.897830  | -0.848058 |
| Pd | 30.045800 | 7.688240  | 12.539200 | H | 31.922100 | 6.712300  | 6.148570  |
| Pd | 27.428100 | 7.686490  | -0.281367 | H | 19.628300 | 0.397872  | 13.281400 |
| N  | 21.086900 | 16.953000 | 5.875420  | H | 28.173100 | 0.397735  | 10.136400 |
| N  | 23.887200 | 16.953600 | 6.196580  | H | 27.157500 | 1.323330  | 1.892500  |
| N  | 21.794700 | -1.578210 | 9.356350  | H | 20.532900 | -1.627510 | 12.995400 |
| N  | 24.247700 | -1.577080 | 7.968330  | H | 20.527600 | -3.695560 | 11.630800 |
| N  | 27.950800 | 5.791560  | 0.046835  | H | 19.459100 | 2.577270  | 14.398600 |
| N  | 29.717600 | 5.792920  | 13.060900 | H | 28.733000 | 5.614870  | -1.877360 |

|   |           |           |           |   |           |           |           |
|---|-----------|-----------|-----------|---|-----------|-----------|-----------|
| N | 15.641300 | 8.305160  | 0.743175  | H | 23.616200 | 6.720000  | 17.023600 |
| N | 30.399500 | 9.583480  | 12.034600 | H | 26.352000 | 0.298329  | 3.972530  |
| N | 29.015100 | 8.303040  | 0.754320  | H | 25.673500 | 6.244680  | 15.771400 |
| N | 26.922900 | 9.581820  | -0.635625 | H | 30.669600 | 6.237730  | 4.091050  |
| N | 18.797600 | 7.071800  | 16.208400 | H | 14.039600 | 7.896030  | -0.526813 |
| N | 31.103500 | 7.071550  | 10.966500 | H | 24.169000 | -3.613800 | 8.405830  |
| C | 26.233100 | 14.509000 | 4.704150  | H | 27.603700 | 12.790500 | 2.073010  |
| C | 19.885100 | 15.779300 | 4.163420  | H | 22.137300 | 9.135550  | -1.551520 |
| C | 20.578100 | 13.513400 | 3.363860  | H | 31.874100 | 9.759880  | 13.497600 |
| C | 28.625300 | 10.112900 | 4.623610  | H | 16.960100 | 12.797600 | 2.153690  |
| C | 29.841400 | 11.529700 | 10.748700 | H | 17.821600 | 7.481410  | 18.004400 |
| C | 19.078800 | 9.440150  | -0.032016 | H | 15.307400 | 8.499840  | -2.590300 |
| C | 19.509400 | 10.117700 | 1.131230  | H | 28.387800 | 9.756850  | -2.108550 |
| C | 25.597400 | 15.776200 | 4.995790  | H | 31.641100 | 5.616780  | 13.845000 |
| C | 25.637100 | 11.529000 | -0.080354 | H | 32.348300 | 8.503860  | 0.420016  |
| C | 26.394100 | 13.509700 | 5.690520  | H | 32.899300 | 7.480280  | 11.943200 |
| C | 28.902400 | 8.711330  | 2.010770  | H | 29.291200 | 2.576520  | 10.306000 |
| C | 30.508600 | 6.661420  | 9.854770  | H | 32.154300 | 9.256640  | 2.772490  |
| C | 24.629700 | 12.124900 | 0.770940  | H | 25.793400 | 0.297137  | 11.464300 |
| C | 29.789100 | 9.436660  | 4.192780  | H | 27.872600 | 1.323190  | 12.270100 |
| C | 21.807100 | -0.468690 | 10.082300 | H | 27.886000 | -1.626980 | 9.232450  |
| C | 18.902200 | 11.959500 | 2.499850  | H | 25.484800 | 19.066600 | 4.136420  |
| C | 20.071200 | 9.113530  | -0.971076 | H | 17.658800 | 9.255740  | -2.397410 |
| C | 20.869400 | 10.220700 | 1.372760  | H | 26.157000 | 13.313900 | -1.204030 |
| C | 26.692600 | 14.196900 | 3.414020  | H | 26.521400 | -3.694890 | 9.235980  |
| C | 24.973600 | -0.467572 | 7.956900  | H | 19.029200 | 19.070400 | 4.280280  |
| C | 28.549700 | 13.455200 | 9.842280  | H | 30.964200 | 13.315600 | 11.266900 |
| C | 27.256300 | 11.953900 | 4.015590  | H | 21.885100 | 6.124050  | 18.307400 |
| C | 22.824900 | 13.266900 | 2.639230  | H | 27.928400 | 12.176900 | -2.510860 |
| C | 29.231700 | 5.257330  | 7.560640  | H | 32.273700 | 12.180200 | 13.037500 |
| C | 29.990600 | 9.067500  | 2.807860  | H | 19.796800 | 6.878750  | 19.406200 |
| C | 26.995200 | 0.862344  | 8.422970  | H | 34.301900 | 6.872620  | 9.970070  |
| C | 19.909400 | 6.662360  | 15.613200 | H | 29.283600 | 3.195240  | -1.609880 |
| C | 24.624800 | 5.462110  | 14.073700 | H | 28.774000 | 2.060000  | 0.532692  |
| C | 17.694300 | 9.070000  | -0.233267 | H | 31.373400 | 3.197130  | 14.395900 |
| C | 27.943300 | 3.845690  | 1.449170  | H | 29.231500 | 2.061630  | 13.884500 |
| C | 20.454700 | 18.106100 | 5.541820  | H | 33.203600 | 6.117990  | 7.881400  |
| C | 16.897300 | 8.714820  | 0.855402  | H | 24.238700 | 14.944700 | 6.449040  |
| C | 28.970100 | 5.459200  | 5.139840  | H | 23.318400 | 14.947900 | 9.349930  |
| C | 18.302000 | 14.202300 | 3.066240  | H | 20.410900 | 14.947200 | 8.424370  |
| C | 22.204200 | 5.259030  | 14.336400 | H | 21.337100 | 14.944400 | 5.521250  |
| C | 19.215400 | 16.987500 | 3.828020  | H | 25.453200 | 9.569350  | 0.800274  |
| C | 29.335300 | 9.913070  | 6.952890  | H | 27.204400 | 5.805470  | 1.961290  |
| C | 26.293900 | -0.403547 | 8.403450  | H | 27.803800 | 5.806770  | 12.313100 |

|   |           |           |           |   |           |           |           |
|---|-----------|-----------|-----------|---|-----------|-----------|-----------|
| C | 22.096200 | 3.129640  | 12.379400 | H | 28.962600 | 9.569110  | 10.565900 |
| C | 30.470900 | 5.934440  | 7.500560  | H | 15.689500 | 9.571000  | 4.307530  |
| C | 21.343500 | -2.731080 | 9.911090  | H | 16.852300 | 5.807580  | 2.556460  |
| C | 27.119400 | 13.265000 | 7.937220  | H | 17.449500 | 5.806400  | 12.908800 |
| C | 24.221900 | 18.105300 | 5.562870  | H | 19.203600 | 9.569550  | 14.067700 |
| C | 23.360300 | 5.155720  | 13.580600 | H | 23.938400 | 15.078400 | 2.369360  |
| C | 28.476100 | 5.154590  | 6.404390  | H | 25.536100 | 14.052600 | 0.813257  |
| C | 30.542500 | 9.362170  | 6.527800  | H | 19.116400 | 14.051900 | 14.047600 |
| C | 21.109400 | 3.415620  | 13.317700 | H | 20.714900 | 15.077900 | 12.492200 |
| C | 25.934500 | 16.983300 | 4.324880  | H | 27.389900 | 15.077500 | 9.048950  |
| C | 22.264300 | 5.937800  | 15.574600 | H | 31.654400 | 8.658790  | 4.867260  |
| C | 21.361300 | -0.404545 | 11.402700 | H | 17.257500 | 15.081500 | 5.820930  |
| C | 21.342300 | 0.861511  | 12.103900 | H | 12.993900 | 8.662090  | 10.006400 |
| C | 26.541800 | 2.109890  | 5.102510  | O | 28.859700 | 4.627860  | 8.725030  |
| C | 30.244500 | 8.234770  | 0.184764  | O | 26.123300 | 1.531030  | 6.279350  |
| C | 26.954900 | 3.436710  | 5.032520  | O | 28.277900 | 5.159700  | 3.988050  |
| C | 27.554000 | 3.250540  | 2.709810  | O | 25.687300 | 5.265950  | 6.752330  |
| C | 26.757400 | 1.862770  | 7.453330  | O | 29.151200 | 10.214100 | 8.283600  |
| C | 30.945900 | 6.260320  | 6.219440  | O | 27.825100 | 10.740900 | 3.698490  |
| C | 20.335800 | 1.172490  | 13.033100 | O | 26.272600 | 13.843500 | 7.018750  |
| C | 28.210600 | 3.415710  | 8.655920  | O | 25.683200 | 10.108200 | 6.761690  |
| C | 22.312300 | 1.861470  | 11.866000 | C | 26.780500 | 12.240900 | 5.291280  |
| C | 25.847200 | 3.984720  | 12.674800 | O | 22.750500 | 13.847000 | 11.381400 |
| C | 27.925000 | 1.172640  | 9.429110  | O | 21.487600 | 10.218500 | 14.262300 |
| C | 21.839000 | 9.915780  | 0.422563  | O | 26.074300 | 10.753800 | 12.944800 |
| C | 28.527400 | 11.390700 | 8.625590  | O | 23.019700 | 10.111900 | 10.796900 |
| C | 27.109100 | 1.920530  | 2.788750  | O | 25.776600 | 5.161780  | 13.382000 |
| C | 28.315500 | 3.846910  | 13.052400 | O | 23.486500 | 1.529270  | 11.232400 |
| C | 24.732800 | 3.436400  | 12.061600 | O | 21.040000 | 4.628390  | 13.965500 |
| C | 20.876800 | -1.612720 | 11.974000 | O | 23.011400 | 5.262640  | 10.791400 |
| C | 20.882200 | -2.763700 | 11.216000 | O | 23.615600 | 4.627470  | 0.902452  |
| C | 20.223000 | 2.396040  | 13.658900 | O | 21.170000 | 1.531520  | 3.639920  |
| C | 28.528200 | 5.079850  | -0.953396 | O | 18.879200 | 5.161140  | 1.486380  |
| C | 23.545300 | 6.265760  | 16.048400 | O | 21.645200 | 5.266250  | 4.075530  |
| C | 23.512500 | 11.391900 | 1.231630  | O | 15.794500 | 4.625860  | 6.146390  |
| C | 26.643500 | 1.336590  | 3.947870  | O | 16.379000 | 5.160270  | 10.882700 |
| C | 24.707500 | 6.014800  | 15.350200 | O | 21.906600 | 13.846000 | 3.485670  |
| C | 30.247700 | 6.009310  | 5.057150  | O | 23.169900 | 10.215800 | 0.607396  |
| C | 15.072000 | 8.234180  | -0.486125 | O | 18.584300 | 10.747200 | 1.930110  |
| C | 24.802200 | -2.730210 | 8.419160  | O | 21.644200 | 10.110700 | 4.074170  |
| C | 27.222800 | 12.972600 | 3.065610  | O | 15.496700 | 10.218400 | 6.589990  |
| C | 21.414200 | 9.364510  | -0.784577 | O | 18.373800 | 13.849800 | 7.853300  |
| C | 27.271800 | 3.130570  | 7.669420  | O | 18.529600 | 1.528390  | 8.592710  |
| C | 31.322700 | 10.295100 | 12.728600 | O | 18.968900 | 5.261750  | 8.117060  |

|   |           |           |           |   |           |           |           |
|---|-----------|-----------|-----------|---|-----------|-----------|-----------|
| C | 17.952800 | 12.978900 | 2.534500  | O | 16.819600 | 10.750300 | 11.175600 |
| C | 18.755600 | 7.143400  | 17.562500 | O | 18.964000 | 10.115200 | 8.115990  |
| C | 24.663100 | 2.108840  | 11.650800 | P | 23.255200 | 10.955400 | 11.962400 |
| C | 27.055300 | 3.251320  | 12.662600 | P | 23.250300 | 4.422480  | 11.958500 |
| C | 31.198400 | 6.305040  | 8.695660  | P | 26.853000 | 4.423610  | 6.514560  |
| C | 15.786000 | 8.567500  | -1.624610 | P | 26.848900 | 10.949400 | 6.519570  |
| C | 27.568500 | 3.983960  | 3.917820  | P | 21.404900 | 10.952600 | 2.908410  |
| C | 27.525900 | 11.937900 | 7.840670  | P | 21.405900 | 4.423850  | 2.910130  |
| C | 27.618200 | 10.292700 | -1.558560 | P | 17.802100 | 4.421220  | 8.356230  |
| C | 30.717400 | 5.081590  | 13.639500 | P | 17.797600 | 10.956300 | 8.355040  |

**Table S4.** Cartesian coordinates of all-exo-Pd<sub>6</sub>L<sub>8</sub><sup>P</sup>.

|   |           |          |          |   |           |           |            |
|---|-----------|----------|----------|---|-----------|-----------|------------|
| P | -6.038000 | 6.026000 | 6.033000 | C | 6.244000  | 6.331000  | -3.340000  |
| O | -7.312000 | 5.463000 | 3.391000 | C | 5.862000  | 6.908000  | -2.126000  |
| O | -5.470000 | 3.382000 | 7.305000 | H | 6.448000  | 6.726000  | -1.240000  |
| O | -3.396000 | 7.303000 | 5.470000 | C | 4.751000  | 7.721000  | -2.089000  |
| C | -3.203000 | 3.901000 | 7.953000 | H | 4.506000  | 8.211000  | -1.158000  |
| C | -4.415000 | 4.259000 | 7.316000 | C | 3.902000  | 7.940000  | -3.194000  |
| C | -4.469000 | 5.472000 | 6.647000 | C | 4.265000  | 7.309000  | -4.407000  |
| C | -3.350000 | 6.241000 | 6.340000 | C | 3.102000  | 2.761000  | -8.830000  |
| C | -2.137000 | 5.865000 | 6.924000 | C | 4.188000  | 2.334000  | -9.642000  |
| H | -1.252000 | 6.454000 | 6.745000 | C | 1.909000  | 2.047000  | -8.959000  |
| C | -2.101000 | 4.754000 | 7.738000 | C | 3.988000  | 1.324000  | -10.551000 |
| H | -1.171000 | 4.514000 | 8.233000 | H | 5.142000  | 2.825000  | -9.560000  |
| C | -4.270000 | 7.310000 | 4.412000 | H | 1.074000  | 2.272000  | -8.300000  |
| C | -5.484000 | 6.642000 | 4.465000 | H | 4.788000  | 0.998000  | -11.198000 |
| C | -6.250000 | 6.333000 | 3.345000 | C | 8.832000  | 3.092000  | -2.762000  |
| C | -5.871000 | 6.914000 | 2.132000 | C | 9.644000  | 4.179000  | -2.335000  |
| H | -6.458000 | 6.734000 | 1.246000 | C | 8.961000  | 1.900000  | -2.047000  |
| C | -4.760000 | 7.728000 | 2.096000 | C | 10.553000 | 3.979000  | -1.325000  |
| H | -4.517000 | 8.220000 | 1.166000 | H | 9.562000  | 5.132000  | -2.828000  |
| C | -3.910000 | 7.944000 | 3.200000 | H | 8.302000  | 1.064000  | -2.273000  |
| C | -6.651000 | 4.457000 | 5.478000 | H | 11.200000 | 4.779000  | -1.001000  |
| C | -6.340000 | 3.337000 | 6.243000 | C | 2.758000  | 8.817000  | -3.092000  |
| C | -6.921000 | 2.124000 | 5.863000 | C | 2.337000  | 9.636000  | -4.176000  |
| H | -6.740000 | 1.237000 | 6.449000 | C | 2.037000  | 8.939000  | -1.902000  |
| C | -7.735000 | 2.088000 | 4.753000 | C | 1.326000  | 10.544000 | -3.976000  |
| H | -8.228000 | 1.158000 | 4.509000 | H | 2.834000  | 9.559000  | -5.127000  |
| C | -7.954000 | 3.192000 | 3.904000 | H | 2.259000  | 8.274000  | -1.070000  |
| C | -7.320000 | 4.405000 | 4.264000 | H | 1.005000  | 11.195000 | -4.774000  |
| C | -2.765000 | 8.821000 | 3.098000 | N | 1.059000  | 9.815000  | -1.718000  |
| C | -2.342000 | 9.637000 | 4.182000 | N | 1.724000  | 1.070000  | -9.838000  |

|   |            |           |           |   |           |           |            |
|---|------------|-----------|-----------|---|-----------|-----------|------------|
| C | -2.047000  | 8.945000  | 1.907000  | N | 9.839000  | 1.716000  | -1.070000  |
| C | -1.330000  | 10.545000 | 3.982000  | P | -6.036000 | 6.029000  | -6.037000  |
| H | -2.837000  | 9.560000  | 5.135000  | O | -7.308000 | 3.385000  | -5.473000  |
| H | -2.271000  | 8.282000  | 1.074000  | O | -5.474000 | 7.303000  | -3.394000  |
| H | -1.007000  | 11.195000 | 4.781000  | O | -3.392000 | 5.467000  | -7.310000  |
| C | -3.100000  | 2.758000  | 8.831000  | O | -6.884000 | 6.876000  | -6.884000  |
| C | -4.187000  | 2.327000  | 9.640000  | C | -3.203000 | 7.945000  | -3.905000  |
| C | -1.905000  | 2.048000  | 8.963000  | C | -4.415000 | 7.311000  | -4.267000  |
| C | -3.986000  | 1.319000  | 10.550000 | C | -4.468000 | 6.644000  | -5.481000  |
| H | -5.142000  | 2.816000  | 9.555000  | C | -3.347000 | 6.336000  | -6.247000  |
| H | -1.069000  | 2.276000  | 8.306000  | C | -2.135000 | 6.917000  | -5.867000  |
| H | -4.786000  | 0.991000  | 11.195000 | H | -1.248000 | 6.737000  | -6.454000  |
| C | -8.832000  | 3.092000  | 2.761000  | C | -2.099000 | 7.729000  | -4.755000  |
| C | -9.648000  | 4.177000  | 2.340000  | H | -1.169000 | 8.222000  | -4.511000  |
| C | -8.958000  | 1.902000  | 2.041000  | C | -4.266000 | 4.409000  | -7.319000  |
| C | -10.557000 | 3.980000  | 1.329000  | C | -5.480000 | 4.461000  | -6.651000  |
| H | -9.570000  | 5.129000  | 2.836000  | C | -6.245000 | 3.340000  | -6.343000  |
| H | -8.296000  | 1.068000  | 2.263000  | C | -5.865000 | 2.128000  | -6.925000  |
| H | -11.207000 | 4.779000  | 1.008000  | H | -6.452000 | 1.241000  | -6.745000  |
| N | -9.836000  | 1.720000  | 1.063000  | C | -4.754000 | 2.093000  | -7.738000  |
| N | -1.068000  | 9.821000  | 1.722000  | H | -4.511000 | 1.163000  | -8.232000  |
| N | -1.719000  | 1.073000  | 9.844000  | C | -3.905000 | 3.197000  | -7.954000  |
| P | -6.031000  | -6.022000 | 6.035000  | C | -6.650000 | 5.473000  | -4.468000  |
| O | -5.468000  | -7.299000 | 3.393000  | C | -6.343000 | 6.240000  | -3.349000  |
| O | -3.387000  | -5.459000 | 7.308000  | C | -6.927000 | 5.862000  | -2.137000  |
| O | -7.303000  | -3.379000 | 5.468000  | H | -6.749000 | 6.451000  | -1.251000  |
| O | -6.878000  | -6.868000 | 6.883000  | C | -7.740000 | 4.751000  | -2.101000  |
| C | -3.902000  | -3.189000 | 7.952000  | H | -8.235000 | 4.510000  | -1.172000  |
| C | -4.261000  | -4.401000 | 7.317000  | C | -7.954000 | 3.900000  | -3.204000  |
| C | -5.475000  | -4.453000 | 6.648000  | C | -7.318000 | 4.259000  | -4.416000  |
| C | -6.241000  | -3.333000 | 6.338000  | C | -2.760000 | 3.096000  | -8.831000  |
| C | -5.862000  | -2.121000 | 6.920000  | C | -2.336000 | 4.183000  | -9.645000  |
| H | -6.448000  | -1.234000 | 6.740000  | C | -2.043000 | 1.905000  | -8.958000  |
| C | -4.751000  | -2.085000 | 7.735000  | C | -1.325000 | 3.984000  | -10.553000 |
| H | -4.509000  | -1.155000 | 8.228000  | H | -2.831000 | 5.135000  | -9.565000  |
| C | -7.313000  | -4.255000 | 4.412000  | H | -2.267000 | 1.070000  | -8.298000  |
| C | -6.645000  | -5.468000 | 4.466000  | H | -1.002000 | 4.784000  | -11.201000 |
| C | -6.338000  | -6.237000 | 3.347000  | C | -3.101000 | 8.820000  | -2.760000  |
| C | -6.921000  | -5.860000 | 2.135000  | C | -4.186000 | 9.635000  | -2.334000  |
| H | -6.743000  | -6.449000 | 1.249000  | C | -1.910000 | 8.943000  | -2.042000  |
| C | -7.735000  | -4.750000 | 2.098000  | C | -3.986000 | 10.542000 | -1.322000  |
| H | -8.230000  | -4.509000 | 1.169000  | H | -5.139000 | 9.557000  | -2.829000  |
| C | -7.950000  | -3.897000 | 3.200000  | H | -1.077000 | 8.281000  | -2.267000  |
| C | -4.462000  | -6.638000 | 5.480000  | H | -4.784000 | 11.191000 | -0.998000  |

|   |            |            |           |   |            |           |            |
|---|------------|------------|-----------|---|------------|-----------|------------|
| C | -3.342000  | -6.329000  | 6.246000  | C | -8.831000  | 2.755000  | -3.103000  |
| C | -2.130000  | -6.911000  | 5.867000  | C | -9.642000  | 2.326000  | -4.189000  |
| H | -1.243000  | -6.731000  | 6.454000  | C | -8.961000  | 2.043000  | -1.909000  |
| C | -2.094000  | -7.725000  | 4.757000  | C | -10.551000 | 1.316000  | -3.989000  |
| H | -1.164000  | -8.218000  | 4.514000  | H | -9.559000  | 2.816000  | -5.144000  |
| C | -3.198000  | -7.942000  | 3.907000  | H | -8.302000  | 2.269000  | -1.074000  |
| C | -4.410000  | -7.307000  | 4.267000  | H | -11.196000 | 0.989000  | -4.789000  |
| C | -8.828000  | -2.754000  | 3.098000  | N | -9.839000  | 1.066000  | -1.723000  |
| C | -9.638000  | -2.324000  | 4.184000  | N | -1.064000  | 1.722000  | -9.835000  |
| C | -8.959000  | -2.042000  | 1.903000  | N | -1.725000  | 9.819000  | -1.062000  |
| C | -10.549000 | -1.316000  | 3.983000  | P | -6.031000  | -6.027000 | -6.034000  |
| H | -9.554000  | -2.813000  | 5.139000  | O | -3.388000  | -7.301000 | -5.469000  |
| H | -8.301000  | -2.269000  | 1.068000  | O | -7.307000  | -5.464000 | -3.392000  |
| H | -11.195000 | -0.989000  | 4.784000  | O | -5.466000  | -3.383000 | -7.306000  |
| C | -2.759000  | -3.088000  | 8.831000  | O | -6.878000  | -6.874000 | -6.882000  |
| C | -2.336000  | -4.175000  | 9.645000  | C | -7.951000  | -3.195000 | -3.906000  |
| C | -2.042000  | -1.897000  | 8.959000  | C | -7.315000  | -4.406000 | -4.266000  |
| C | -1.326000  | -3.977000  | 10.555000 | C | -6.646000  | -4.458000 | -5.479000  |
| H | -2.831000  | -5.127000  | 9.564000  | C | -6.336000  | -3.338000 | -6.244000  |
| H | -2.265000  | -1.062000  | 8.299000  | C | -6.919000  | -2.126000 | -5.866000  |
| H | -1.004000  | -4.777000  | 11.203000 | H | -6.739000  | -1.239000 | -6.452000  |
| C | -3.097000  | -8.819000  | 2.763000  | C | -7.734000  | -2.090000 | -4.756000  |
| C | -4.182000  | -9.634000  | 2.339000  | H | -8.228000  | -1.161000 | -4.513000  |
| C | -1.906000  | -8.946000  | 2.046000  | C | -4.409000  | -4.258000 | -7.315000  |
| C | -3.983000  | -10.543000 | 1.328000  | C | -4.462000  | -5.472000 | -6.647000  |
| H | -5.135000  | -9.555000  | 2.834000  | C | -3.342000  | -6.238000 | -6.338000  |
| H | -1.071000  | -8.284000  | 2.270000  | C | -2.130000  | -5.860000 | -6.921000  |
| H | -4.782000  | -11.192000 | 1.006000  | H | -1.244000  | -6.448000 | -6.741000  |
| N | -1.722000  | -9.823000  | 1.068000  | C | -2.094000  | -4.750000 | -7.735000  |
| N | -9.840000  | -1.067000  | 1.717000  | H | -1.164000  | -4.508000 | -8.229000  |
| N | -1.064000  | -1.715000  | 9.838000  | C | -3.197000  | -3.898000 | -7.951000  |
| P | 6.035000   | 6.029000   | 6.031000  | C | -5.477000  | -6.642000 | -4.465000  |
| O | 5.468000   | 7.301000   | 3.387000  | C | -6.244000  | -6.333000 | -3.346000  |
| O | 3.394000   | 5.468000   | 7.309000  | C | -5.866000  | -6.915000 | -2.133000  |
| O | 7.306000   | 3.384000   | 5.467000  | H | -6.455000  | -6.736000 | -1.247000  |
| O | 6.884000   | 6.877000   | 6.876000  | C | -4.755000  | -7.728000 | -2.096000  |
| C | 3.907000   | 3.198000   | 7.954000  | H | -4.513000  | -8.222000 | -1.166000  |
| C | 4.268000   | 4.409000   | 7.317000  | C | -3.904000  | -7.944000 | -3.199000  |
| C | 5.480000   | 4.461000   | 6.647000  | C | -4.263000  | -7.309000 | -4.411000  |
| C | 6.245000   | 3.340000   | 6.338000  | C | -3.095000  | -2.755000 | -8.829000  |
| C | 5.866000   | 2.128000   | 6.922000  | C | -4.181000  | -2.328000 | -9.641000  |
| H | 6.453000   | 1.242000   | 6.742000  | C | -1.902000  | -2.041000 | -8.958000  |
| C | 4.757000   | 2.094000   | 7.737000  | C | -3.981000  | -1.319000 | -10.551000 |
| H | 4.514000   | 1.164000   | 8.231000  | H | -5.135000  | -2.819000 | -9.558000  |

|   |           |           |           |   |            |            |            |
|---|-----------|-----------|-----------|---|------------|------------|------------|
| C | 7.315000  | 4.258000  | 4.409000  | H | -1.066000  | -2.267000  | -8.299000  |
| C | 6.647000  | 5.472000  | 4.462000  | H | -4.781000  | -0.993000  | -11.197000 |
| C | 6.338000  | 6.238000  | 3.342000  | C | -8.830000  | -3.095000  | -2.764000  |
| C | 6.920000  | 5.859000  | 2.129000  | C | -9.645000  | -4.181000  | -2.341000  |
| H | 6.741000  | 6.447000  | 1.243000  | C | -8.958000  | -1.904000  | -2.046000  |
| C | 7.734000  | 4.749000  | 2.093000  | C | -10.555000 | -3.983000  | -1.332000  |
| H | 8.228000  | 4.507000  | 1.164000  | H | -9.564000  | -5.133000  | -2.837000  |
| C | 7.951000  | 3.898000  | 3.197000  | H | -8.297000  | -1.069000  | -2.268000  |
| C | 4.466000  | 6.643000  | 5.477000  | H | -11.204000 | -4.782000  | -1.010000  |
| C | 3.347000  | 6.336000  | 6.245000  | C | -2.759000  | -8.821000  | -3.097000  |
| C | 2.134000  | 6.917000  | 5.867000  | C | -2.332000  | -9.634000  | -4.182000  |
| H | 1.248000  | 6.738000  | 6.456000  | C | -2.044000  | -8.947000  | -1.904000  |
| C | 2.096000  | 7.729000  | 4.755000  | C | -1.322000  | -10.543000 | -3.981000  |
| H | 1.166000  | 8.222000  | 4.513000  | H | -2.825000  | -9.554000  | -5.136000  |
| C | 3.199000  | 7.944000  | 3.903000  | H | -2.270000  | -8.287000  | -1.070000  |
| C | 4.412000  | 7.310000  | 4.262000  | H | -0.997000  | -11.191000 | -4.780000  |
| C | 8.828000  | 2.755000  | 3.095000  | N | -1.067000  | -9.825000  | -1.718000  |
| C | 9.640000  | 2.328000  | 4.182000  | N | -1.717000  | -1.065000  | -9.838000  |
| C | 8.958000  | 2.041000  | 1.902000  | N | -9.837000  | -1.721000  | -1.068000  |
| C | 10.550000 | 1.318000  | 3.982000  | P | 6.032000   | -6.033000  | -6.034000  |
| H | 9.557000  | 2.819000  | 5.136000  | O | 5.468000   | -7.307000  | -3.391000  |
| H | 8.299000  | 2.266000  | 1.067000  | O | 3.389000   | -5.467000  | -7.307000  |
| H | 11.196000 | 0.993000  | 4.783000  | O | 7.308000   | -3.391000  | -5.471000  |
| C | 2.765000  | 3.099000  | 8.833000  | O | 6.878000   | -6.882000  | -6.882000  |
| C | 2.343000  | 4.185000  | 9.647000  | C | 3.905000   | -3.198000  | -7.952000  |
| C | 2.047000  | 1.908000  | 8.961000  | C | 4.264000   | -4.410000  | -7.316000  |
| C | 1.332000  | 3.988000  | 10.556000 | C | 5.478000   | -4.464000  | -6.649000  |
| H | 2.838000  | 5.137000  | 9.566000  | C | 6.246000   | -3.345000  | -6.340000  |
| H | 2.269000  | 1.073000  | 8.301000  | C | 5.868000   | -2.132000  | -6.922000  |
| H | 1.011000  | 4.788000  | 11.204000 | H | 6.456000   | -1.247000  | -6.743000  |
| C | 3.095000  | 8.819000  | 2.758000  | C | 4.757000   | -2.095000  | -7.736000  |
| C | 4.180000  | 9.633000  | 2.330000  | H | 4.516000   | -1.165000  | -8.230000  |
| C | 1.902000  | 8.944000  | 2.043000  | C | 7.317000   | -4.266000  | -4.413000  |
| C | 3.978000  | 10.540000 | 1.318000  | C | 6.648000   | -5.479000  | -4.466000  |
| H | 5.134000  | 9.554000  | 2.822000  | C | 6.339000   | -6.245000  | -3.346000  |
| H | 1.069000  | 8.283000  | 2.270000  | C | 6.923000   | -5.868000  | -2.134000  |
| H | 4.776000  | 11.189000 | 0.992000  | H | 6.744000   | -6.456000  | -1.248000  |
| N | 1.716000  | 9.821000  | 1.065000  | C | 7.738000   | -4.758000  | -2.099000  |
| N | 9.838000  | 1.064000  | 1.718000  | H | 8.233000   | -4.517000  | -1.169000  |
| N | 1.069000  | 1.726000  | 9.840000  | C | 7.954000   | -3.907000  | -3.202000  |
| P | 6.033000  | -6.028000 | 6.035000  | C | 4.463000   | -6.646000  | -5.478000  |
| O | 7.308000  | -5.467000 | 3.392000  | C | 3.343000   | -6.336000  | -6.244000  |
| O | 5.470000  | -3.383000 | 7.306000  | C | 2.130000   | -6.916000  | -5.864000  |
| O | 3.389000  | -7.301000 | 5.471000  | H | 1.243000   | -6.735000  | -6.451000  |

|   |           |            |           |   |            |            |            |
|---|-----------|------------|-----------|---|------------|------------|------------|
| O | 6.879000  | -6.875000  | 6.884000  | C | 2.093000   | -7.729000  | -4.753000  |
| C | 3.201000  | -3.897000  | 7.953000  | H | 1.163000   | -8.221000  | -4.510000  |
| C | 4.412000  | -4.257000  | 7.316000  | C | 3.197000   | -7.947000  | -3.903000  |
| C | 4.464000  | -5.471000  | 6.648000  | C | 4.410000   | -7.314000  | -4.265000  |
| C | 3.344000  | -6.238000  | 6.341000  | C | 8.832000   | -2.763000  | -3.100000  |
| C | 2.132000  | -5.859000  | 6.924000  | C | 9.643000   | -2.336000  | -4.187000  |
| H | 1.246000  | -6.446000  | 6.745000  | C | 8.962000   | -2.050000  | -1.907000  |
| C | 2.097000  | -4.748000  | 7.738000  | C | 10.553000  | -1.326000  | -3.987000  |
| H | 1.168000  | -4.506000  | 8.232000  | H | 9.561000   | -2.828000  | -5.141000  |
| C | 4.263000  | -7.310000  | 4.414000  | H | 8.303000   | -2.275000  | -1.072000  |
| C | 5.478000  | -6.644000  | 4.467000  | H | 11.199000  | -1.001000  | -4.788000  |
| C | 6.244000  | -6.336000  | 3.347000  | C | 2.762000   | -3.096000  | -8.830000  |
| C | 5.865000  | -6.918000  | 2.134000  | C | 2.336000   | -4.182000  | -9.642000  |
| H | 6.453000  | -6.740000  | 1.248000  | C | 2.048000   | -1.903000  | -8.959000  |
| C | 4.754000  | -7.731000  | 2.098000  | C | 1.326000   | -3.982000  | -10.552000 |
| H | 4.511000  | -8.224000  | 1.169000  | H | 2.827000   | -5.136000  | -9.560000  |
| C | 3.903000  | -7.945000  | 3.202000  | H | 2.273000   | -1.068000  | -8.300000  |
| C | 6.648000  | -4.460000  | 5.479000  | H | 1.001000   | -4.782000  | -11.199000 |
| C | 6.340000  | -3.340000  | 6.244000  | C | 3.095000   | -8.824000  | -2.759000  |
| C | 6.924000  | -2.128000  | 5.865000  | C | 4.180000   | -9.639000  | -2.335000  |
| H | 6.744000  | -1.241000  | 6.451000  | C | 1.904000   | -8.948000  | -2.041000  |
| C | 7.738000  | -2.093000  | 4.754000  | C | 3.980000   | -10.547000 | -1.323000  |
| H | 8.233000  | -1.164000  | 4.511000  | H | 5.133000   | -9.561000  | -2.829000  |
| C | 7.954000  | -3.198000  | 3.905000  | H | 1.070000   | -8.286000  | -2.266000  |
| C | 7.317000  | -4.409000  | 4.265000  | H | 4.778000   | -11.196000 | -1.000000  |
| C | 2.758000  | -8.821000  | 3.100000  | N | 1.719000   | -9.825000  | -1.063000  |
| C | 2.330000  | -9.634000  | 4.186000  | N | 9.841000   | -1.073000  | -1.723000  |
| C | 2.042000  | -8.948000  | 1.908000  | N | 1.071000   | -1.718000  | -9.838000  |
| C | 1.319000  | -10.541000 | 3.986000  | C | -0.723000  | 10.648000  | 2.736000   |
| H | 2.823000  | -9.553000  | 5.140000  | H | 0.047000   | 11.384000  | 2.534000   |
| H | 2.268000  | -8.288000  | 1.073000  | C | -2.738000  | 10.646000  | -0.716000  |
| H | 0.994000  | -11.189000 | 4.786000  | H | -2.536000  | 11.383000  | 0.053000   |
| C | 3.100000  | -2.753000  | 8.830000  | C | 0.716000   | 10.645000  | -2.730000  |
| C | 4.187000  | -2.326000  | 9.640000  | H | -0.054000  | 11.382000  | -2.528000  |
| C | 1.907000  | -2.039000  | 8.960000  | C | 2.729000   | 10.647000  | 0.716000   |
| C | 3.988000  | -1.316000  | 10.550000 | H | 2.526000   | 11.384000  | -0.052000  |
| H | 5.141000  | -2.817000  | 9.557000  | C | -10.662000 | 0.717000   | -2.739000  |
| H | 1.071000  | -2.265000  | 8.302000  | H | -11.402000 | -0.050000  | -2.536000  |
| H | 4.789000  | -0.990000  | 11.195000 | C | -0.719000  | 2.738000   | -10.660000 |
| C | 8.831000  | -3.098000  | 2.761000  | H | 0.050000   | 2.537000   | -11.398000 |
| C | 9.644000  | -4.185000  | 2.337000  | C | 2.739000   | 0.722000   | -10.662000 |
| C | 8.960000  | -1.907000  | 2.044000  | H | 2.537000   | -0.045000  | -11.401000 |
| C | 10.553000 | -3.987000  | 1.326000  | C | 10.663000  | 2.731000   | -0.723000  |
| H | 9.563000  | -5.138000  | 2.832000  | H | 11.402000  | 2.529000   | 0.045000   |

|    |           |           |           |   |            |            |            |
|----|-----------|-----------|-----------|---|------------|------------|------------|
| H  | 8.300000  | -1.072000 | 2.267000  | C | 10.661000  | 0.717000   | 2.734000   |
| H  | 11.201000 | -4.788000 | 1.003000  | H | 11.401000  | -0.049000  | 2.531000   |
| N  | 9.838000  | -1.725000 | 1.066000  | C | 0.726000   | 2.741000   | 10.664000  |
| N  | 1.064000  | -9.825000 | 1.723000  | H | -0.043000  | 2.542000   | 11.403000  |
| N  | 1.723000  | -1.063000 | 9.840000  | C | -2.735000  | 0.722000   | 10.665000  |
| Pd | 0.002000  | 0.005000  | 9.846000  | H | -2.532000  | -0.043000  | 11.406000  |
| Pd | 0.004000  | 0.002000  | -9.842000 | C | -10.662000 | 2.734000   | 0.720000   |
| Pd | -0.001000 | -9.829000 | 0.002000  | H | -11.400000 | 2.534000   | -0.049000  |
| Pd | 9.844000  | -0.005000 | -0.002000 | C | 2.733000   | -10.652000 | -0.717000  |
| Pd | -0.005000 | 9.824000  | 0.002000  | H | 2.531000   | -11.389000 | 0.052000   |
| Pd | -9.843000 | -0.001000 | -0.003000 | C | -0.719000  | -10.650000 | -2.732000  |
| P  | 6.036000  | 6.031000  | -6.030000 | H | 0.049000   | -11.389000 | -2.530000  |
| O  | 3.392000  | 7.304000  | -5.466000 | C | -2.736000  | -10.649000 | 0.723000   |
| O  | 7.307000  | 5.462000  | -3.386000 | H | -2.535000  | -11.387000 | -0.046000  |
| O  | 5.472000  | 3.389000  | -7.308000 | C | 0.716000   | -10.649000 | 2.738000   |
| O  | 6.884000  | 6.879000  | -6.875000 | H | -0.052000  | -11.387000 | 2.535000   |
| C  | 7.954000  | 3.194000  | -3.905000 | C | 2.739000   | -0.715000  | 10.662000  |
| C  | 7.317000  | 4.406000  | -4.263000 | H | 2.538000   | 0.051000   | 11.402000  |
| C  | 6.649000  | 4.461000  | -5.477000 | C | 10.662000  | -2.741000  | 0.721000   |
| C  | 6.342000  | 3.342000  | -6.245000 | H | 11.401000  | -2.540000  | -0.047000  |
| C  | 6.925000  | 2.129000  | -5.868000 | C | 10.664000  | -0.725000  | -2.738000  |
| H  | 6.746000  | 1.244000  | -6.457000 | H | 11.404000  | 0.041000   | -2.536000  |
| C  | 7.739000  | 2.092000  | -4.758000 | C | 0.724000   | -2.733000  | -10.662000 |
| H  | 8.233000  | 1.162000  | -4.517000 | H | -0.043000  | -2.531000  | -11.401000 |
| C  | 4.415000  | 4.263000  | -7.316000 | C | -2.732000  | -0.718000  | -10.662000 |
| C  | 4.468000  | 5.476000  | -6.646000 | H | -2.530000  | 0.048000   | -11.402000 |
| C  | 3.348000  | 6.243000  | -6.338000 | C | -10.662000 | -2.736000  | -0.725000  |
| C  | 2.135000  | 5.865000  | -6.922000 | H | -11.401000 | -2.536000  | 0.044000   |
| H  | 1.249000  | 6.453000  | -6.743000 | C | -10.662000 | -0.718000  | 2.733000   |
| C  | 2.100000  | 4.755000  | -7.737000 | H | -11.403000 | 0.047000   | 2.530000   |
| H  | 1.171000  | 4.514000  | -8.232000 | C | -0.720000  | -2.730000  | 10.663000  |
| C  | 3.203000  | 3.904000  | -7.952000 | H | 0.048000   | -2.529000  | 11.402000  |
| C  | 5.479000  | 6.642000  | -4.460000 | O | -6.886000  | 6.872000   | 6.881000   |

## 9 X-Ray Crystallography

**Table S5.** Crystallographic data of *rac*-Pd<sub>6</sub>L<sub>8</sub>, Pd<sub>6</sub>L<sup>P</sup><sub>8</sub>, Pd<sub>6</sub>L<sup>M</sup><sub>8</sub>.

| Compound                                   | <i>rac</i> -Pd <sub>6</sub> L <sub>8</sub>                                                                                                         | Pd <sub>6</sub> L <sup>P</sup> <sub>8</sub>                                                                                          | Pd <sub>6</sub> L <sup>M</sup> <sub>8</sub>                                                                                       |
|--------------------------------------------|----------------------------------------------------------------------------------------------------------------------------------------------------|--------------------------------------------------------------------------------------------------------------------------------------|-----------------------------------------------------------------------------------------------------------------------------------|
| Identification code                        | mhw01_sq                                                                                                                                           | mhw02_sq                                                                                                                             | mhw03_sq                                                                                                                          |
| CCDC number                                | 2529703                                                                                                                                            | 2529704                                                                                                                              | 2529705                                                                                                                           |
| Empirical formula                          | C <sub>280</sub> H <sub>192</sub> B <sub>4.6</sub> F <sub>18.4</sub> N <sub>24</sub> O <sub>40</sub> P <sub>8</sub> Pd <sub>6</sub> S <sub>8</sub> | C <sub>276</sub> H <sub>162</sub> B <sub>10.2</sub> F <sub>40.8</sub> N <sub>30</sub> O <sub>32</sub> P <sub>8</sub> Pd <sub>6</sub> | C <sub>552</sub> H <sub>324</sub> B <sub>5</sub> F <sub>20</sub> N <sub>60</sub> O <sub>64</sub> P <sub>16</sub> Pd <sub>12</sub> |
| Formula weight                             | 6074.53                                                                                                                                            | 6181.97                                                                                                                              | 11027.06                                                                                                                          |
| Temperature [K]                            | 100(2)                                                                                                                                             | 193(2)                                                                                                                               | 193(2)                                                                                                                            |
| Crystal system                             | triclinic                                                                                                                                          | trigonal                                                                                                                             | tetragonal                                                                                                                        |
| Space group (number)                       | <i>P</i> $\bar{1}$ (2)                                                                                                                             | <i>P</i> 3 <sub>1</sub> 21 (152)                                                                                                     | <i>P</i> 4 <sub>3</sub> (78)                                                                                                      |
| <i>a</i> [Å]                               | 24.5588(14)                                                                                                                                        | 27.629(3)                                                                                                                            | 34.9006(7)                                                                                                                        |
| <i>b</i> [Å]                               | 25.8908(15)                                                                                                                                        | 27.629(3)                                                                                                                            | 34.9006(7)                                                                                                                        |
| <i>c</i> [Å]                               | 34.1752(18)                                                                                                                                        | 48.349(6)                                                                                                                            | 56.377(2)                                                                                                                         |
| $\alpha$ [°]                               | 85.542(3)                                                                                                                                          | 90                                                                                                                                   | 90                                                                                                                                |
| $\beta$ [°]                                | 84.761(4)                                                                                                                                          | 90                                                                                                                                   | 90                                                                                                                                |
| $\gamma$ [°]                               | 83.319(3)                                                                                                                                          | 120                                                                                                                                  | 90                                                                                                                                |
| Volume [Å <sup>3</sup> ]                   | 21443(2)                                                                                                                                           | 31963(8)                                                                                                                             | 68670(4)                                                                                                                          |
| <i>Z</i>                                   | 2                                                                                                                                                  | 3                                                                                                                                    | 4                                                                                                                                 |
| $\rho_{\text{calc}}$ [g cm <sup>-3</sup> ] | 0.941                                                                                                                                              | 0.963                                                                                                                                | 1.067                                                                                                                             |
| $\mu$ [mm <sup>-1</sup> ]                  | 0.371                                                                                                                                              | 1.904                                                                                                                                | 0.406                                                                                                                             |
| <i>F</i> (000)                             | 6145                                                                                                                                               | 9295                                                                                                                                 | 22260                                                                                                                             |
| Crystal size [mm <sup>3</sup> ]            | 0.2×0.2×0.2                                                                                                                                        | 0.2×0.2×0.2                                                                                                                          | 0.2×0.2×0.2                                                                                                                       |
| Crystal colour                             | yellow                                                                                                                                             | yellow                                                                                                                               | yellow                                                                                                                            |
| Crystal shape                              | block                                                                                                                                              | block                                                                                                                                | block                                                                                                                             |
| Radiation                                  | MoK $\alpha$ ( $\lambda$ =0.710 Å)                                                                                                                 | GaK $\alpha$ ( $\lambda$ =1.34135 Å)                                                                                                 | MoK $\alpha$ ( $\lambda$ =0.71073 Å)                                                                                              |
| 2 $\theta$ range [°]                       | 1.67 to 41.59 (1.00 Å)                                                                                                                             | 3.21 to 108.23 (0.83 Å)                                                                                                              | 1.65 to 51.03 (0.82 Å)                                                                                                            |
|                                            | -24 ≤ <i>h</i> ≤ 24                                                                                                                                | -33 ≤ <i>h</i> ≤ 33                                                                                                                  | -42 ≤ <i>h</i> ≤ 41                                                                                                               |
| Index ranges                               | -25 ≤ <i>k</i> ≤ 25                                                                                                                                | -33 ≤ <i>k</i> ≤ 33                                                                                                                  | -42 ≤ <i>k</i> ≤ 42                                                                                                               |
|                                            | -34 ≤ <i>l</i> ≤ 34                                                                                                                                | -58 ≤ <i>l</i> ≤ 58                                                                                                                  | -66 ≤ <i>l</i> ≤ 68                                                                                                               |
| Reflections collected                      | 588126                                                                                                                                             | 553371                                                                                                                               | 1245995                                                                                                                           |
|                                            | 44832                                                                                                                                              | 39193                                                                                                                                | 126434                                                                                                                            |
| Independent reflections                    | <i>R</i> <sub>int</sub> = 0.1138                                                                                                                   | <i>R</i> <sub>int</sub> = 0.0609                                                                                                     | <i>R</i> <sub>int</sub> = 0.1505                                                                                                  |
|                                            | <i>R</i> <sub>sigma</sub> = 0.0597                                                                                                                 | <i>R</i> <sub>sigma</sub> = 0.0261                                                                                                   | <i>R</i> <sub>sigma</sub> = 0.0751                                                                                                |
| Completeness to<br>$\theta$ = 67.679°      | 99.8 %                                                                                                                                             | 99.8 %                                                                                                                               | 100.0 %                                                                                                                           |
| Data / Restraints /<br>Parameters          | 44832 / 7414 / 3520                                                                                                                                | 39193 / 576 / 1860                                                                                                                   | 126434 / 13489 / 6562                                                                                                             |
| Goodness-of-fit on <i>F</i> <sup>2</sup>   | 1.349                                                                                                                                              | 1.030                                                                                                                                | 1.176                                                                                                                             |
| Final <i>R</i> indexes                     | <i>R</i> <sub>1</sub> = 0.1407                                                                                                                     | <i>R</i> <sub>1</sub> = 0.0401                                                                                                       | <i>R</i> <sub>1</sub> = 0.1331                                                                                                    |
| [ <i>I</i> ≥ 2 $\sigma$ ( <i>I</i> )]      | <i>wR</i> <sub>2</sub> = 0.4246                                                                                                                    | <i>wR</i> <sub>2</sub> = 0.1128                                                                                                      | <i>wR</i> <sub>2</sub> = 0.3320                                                                                                   |
| Final <i>R</i> indexes                     | <i>R</i> <sub>1</sub> = 0.1876                                                                                                                     | <i>R</i> <sub>1</sub> = 0.0488                                                                                                       | <i>R</i> <sub>1</sub> = 0.1491                                                                                                    |
| [all data]                                 | <i>wR</i> <sub>2</sub> = 0.5240                                                                                                                    | <i>wR</i> <sub>2</sub> = 0.1196                                                                                                      | <i>wR</i> <sub>2</sub> = 0.3486                                                                                                   |
| Largest peak/hole [eÅ <sup>-3</sup> ]      | 2.07/-1.52                                                                                                                                         | 0.58/-0.61                                                                                                                           | 1.34/-2.19                                                                                                                        |
| Flack X parameter                          | -                                                                                                                                                  | 0.057(5)                                                                                                                             | -0.197(10)                                                                                                                        |

**Table S6.** Crystallographic data of *rac*-Me-Pd<sub>6</sub>L<sub>8</sub>.

| Compound                                     | <i>rac</i> -Me-Pd <sub>6</sub> L <sub>8</sub>                                                    |
|----------------------------------------------|--------------------------------------------------------------------------------------------------|
| Identification code                          | Pd <sub>6</sub> L <sub>8</sub>                                                                   |
| CCDC number                                  | 2533778                                                                                          |
| Empirical formula                            | C <sub>264</sub> H <sub>192</sub> N <sub>24</sub> O <sub>16</sub> P <sub>4</sub> Pd <sub>3</sub> |
| Formula weight                               | 4399.50                                                                                          |
| Temperature                                  | 253(2) K                                                                                         |
| Wavelength                                   | 1.3405 Å                                                                                         |
| Crystal system                               | Cubic                                                                                            |
| Space group                                  | <i>Fm-3m</i>                                                                                     |
| Unit cell dimensions                         | a = 36.6353(5) Å<br>b = 36.6353(5) Å<br>c = 36.6353(5) Å                                         |
| Volume                                       | 49170(2) Å <sup>3</sup>                                                                          |
| Z                                            | 8                                                                                                |
| Density (calculated)                         | 1.189 Mg/m <sup>3</sup>                                                                          |
| Absorption coefficient                       | 1.677 mm <sup>-1</sup>                                                                           |
| F(000)                                       | 18160                                                                                            |
| Crystal size                                 | 0.40 × 0.32 × 24 mm <sup>3</sup>                                                                 |
| Theta range for data collection              | 1.816 to 42.796°.                                                                                |
| Index ranges                                 | -36 ≤ h ≤ 28, -36 ≤ k ≤ 15, -12 ≤ l ≤ 36                                                         |
| Reflections collected                        | 21746                                                                                            |
| Independent reflections                      | 1369 [R(int) = 0.0327]                                                                           |
| Completeness to theta = 42.796°              | 97.9%                                                                                            |
| Refinement method                            | Full-matrix least-squares on <i>F</i> <sup>2</sup>                                               |
| Data / restraints / parameters               | 1369 / 123 / 113                                                                                 |
| Goodness-of-fit on <i>F</i> <sup>2</sup>     | 1.878                                                                                            |
| Final R indices [ <i>I</i> > 2σ( <i>I</i> )] | <i>R</i> <sub>1</sub> = 0.1406, <i>wR</i> <sub>2</sub> = 0.3770                                  |
| R indices (all data)                         | <i>R</i> <sub>1</sub> = 0.1437, <i>wR</i> <sub>2</sub> = 0.3848                                  |
| Extinction coefficient                       | 0.00012(3)                                                                                       |
| Largest diff. peak and hole                  | 3.083                                                                                            |

**a. *rac*-Pd<sub>6</sub>L<sub>8</sub>·4.6BF<sub>4</sub><sup>-</sup>·7.8DMSO [+ anions] [+ solvent]**

Crystals of *rac*-Pd<sub>6</sub>L<sub>8</sub> cage suitable for X-ray diffraction analysis were obtained by vapor diffusion of isopropyl acetate into an acetonitrile-DMSO mixed solvent of *rac*-Pd<sub>6</sub>L<sub>8</sub> cage at room temperature. The crystals were prone to a loss of solvent after removal from the mother liquor and rapid handling in polybutylene oil prior to flash cooling in liquid nitrogen was required to collect data. Data for *rac*-Pd<sub>6</sub>L<sub>8</sub> were collected from a shock-cooled single crystal at 100 K on a Bruker D8 VENTURE dual wavelength Mo/Cu three-circle diffractometer with a microfocus sealed X-ray tube using a mirror optics as monochromator and a Bruker PHOTON III detector. Data were observed to approximately 1.0 Å resolution. All data were integrated with SAINT V8.41 and a multi-scan absorption correction using SADABS 2016/2 was applied.<sup>10, 11</sup> The structure was solved by intrinsic phasing/direct methods using SHELXT<sup>12</sup> and refined with SHELXL<sup>13</sup> for full-matrix least-squares routines on  $F^2$  and ShelXle<sup>14</sup> as a graphical user interface.

***Specific refinement details***

Stereochemical restraints for the ligand L, DMSO and BF<sub>4</sub><sup>-</sup> were generated by the GRADE2 program using the GRADE Web Server (<http://grade.globalphasing.org>) and applied in the refinement. A GRADE dictionary for SHELXL contains target values and standard deviations for 1,2-distances (DFIX) and 1,3-distances (DANG), as well as restraints for planar groups (FLAT). All non-hydrogen atoms were refined with anisotropic displacement parameters. All hydrogen atoms were refined isotropic on calculated positions using a riding model with their  $U_{iso}$  values constrained to 1.5 times the  $U_{eq}$  of their pivot atoms for terminal sp<sup>3</sup> carbon atoms and 1.2 times for all other carbon atoms. Similarity restraints (SIMU) and rigid bond restraints (RIGU) were applied to all atoms except for Palladium during anisotropic refinement. The contribution of the electron density from disordered counterions and solvent molecules, which could not be modeled with discrete atomic positions were handled using the SQUEEZE<sup>15</sup> routine in PLATON. The solvent mask file (.fab) computed by PLATON was included in the SHELXL refinement via the ABIN instruction leaving the measured intensities untouched.

**b. Pd<sub>6</sub>L<sup>P</sup><sub>8</sub>·10.2BF<sub>4</sub>·6MeCN [+ anions] [+ solvent]**

Crystals of Pd<sub>6</sub>L<sup>P</sup><sub>8</sub> suitable for X-ray diffraction analysis were obtained by vapor diffusion of diethyl ether into an acetonitrile solution of Pd<sub>6</sub>L<sup>P</sup><sub>8</sub> at room temperature. The crystals were prone to a loss of solvent after removal from the mother liquor and rapid handling in polybutylene oil prior to flash cooling in liquid nitrogen was required to collect data. Data for Pd<sub>6</sub>L<sup>P</sup><sub>8</sub> were collected from a shock-cooled single crystal at 193 K on a Bruker D8 VENTURE MetalJet PHOTON II four-circle diffractometer with a MetalJet using a Helios Multi-layer Optic as monochromator and a Bruker PHOTON II detector. Data were observed to approximately 0.83 Å resolution. All data were integrated with SAINT V8.41 and a multi-scan absorption correction using SADABS 2016/2 was applied.<sup>10,11</sup> The structure was solved by intrinsic phasing/direct methods using SHELXT<sup>12</sup> and refined with SHELXL<sup>13</sup> for full-matrix least-squares routines on  $F^2$  and ShelXle<sup>14</sup> as a graphical user interface.

**Specific refinement details**

Stereochemical restraints for the MeCN, BF<sub>4</sub><sup>-</sup> were generated by the GRADE2 program using the GRADE Web Server (<http://grade.globalphasing.org>) and applied in the refinement. A GRADE dictionary for SHELXL contains target values and standard deviations for 1,2-distances (DFIX) and 1,3-distances (DANG), as well as restraints for planar groups (FLAT). All non-hydrogen atoms were refined with anisotropic displacement parameters. All hydrogen atoms were refined isotropic on calculated positions using a riding model with their  $U_{\text{iso}}$  values constrained to 1.5 times the  $U_{\text{eq}}$  of their pivot atoms for terminal sp<sup>3</sup> carbon atoms and 1.2 times for all other carbon atoms. Similarity restraints (SIMU) and rigid bond restraints (RIGU) were applied to the boron and fluorine atoms of the BF<sub>4</sub><sup>-</sup> anion. The contribution of the electron density from disordered counterions and solvent molecules, which could not be modeled with discrete atomic positions were handled using the SQUEEZE<sup>15</sup> routine in PLATON. The solvent mask file (.fab) computed by PLATON was included in the SHELXL refinement via the ABIN instruction leaving the measured intensities untouched.

**c. Pd<sub>6</sub>L<sup>M</sup><sub>8</sub>·5BF<sub>4</sub>·12MeCN [+ anions] [+ solvent]**

Crystals of Pd<sub>6</sub>L<sup>M</sup><sub>8</sub> suitable for X-ray diffraction analysis were obtained by vapor diffusion of diethyl ether into an acetonitrile solution of Pd<sub>6</sub>L<sup>M</sup><sub>8</sub> at room temperature. The crystals were prone to a loss of solvent after removal from the mother liquor and rapid handling in polybutylene oil prior to flash cooling in liquid nitrogen was required to collect data. Data for Pd<sub>6</sub>L<sup>M</sup><sub>8</sub> were collected from a shock-cooled single crystal at 193 K on a Bruker D8 VENTURE dual wavelength Mo/Cu three-circle diffractometer with a microfocus sealed X-ray tube using a mirror optics as monochromator and a Bruker PHOTON III detector. Data were observed to approximately 0.82 Å resolution. All data were integrated with SAINT V8.41 and a multi-scan absorption correction using SADABS 2016/2 was applied.<sup>10,11</sup> The structure was solved by intrinsic phasing/direct methods using SHELXT<sup>12</sup> and refined with SHELXL<sup>13</sup> for full-matrix least-squares routines on  $F^2$  and ShelXle<sup>14</sup> as a graphical user interface.

**Specific refinement details**

Stereochemical restraints for the ligand L, MeCN, BF<sub>4</sub><sup>-</sup> were generated by the GRADE2 program using the GRADE Web Server (<http://grade.globalphasing.org>) and applied in the refinement. A GRADE dictionary for SHELXL contains target values and standard deviations for 1,2-distances (DFIX) and 1,3-distances (DANG), as well as restraints for planar groups (FLAT). All non-hydrogen atoms were refined with anisotropic displacement parameters. All hydrogen atoms were refined isotropic on calculated positions using a riding model with their  $U_{\text{iso}}$  values constrained to 1.5 times the  $U_{\text{eq}}$  of their pivot atoms for terminal sp<sup>3</sup> carbon atoms and 1.2 times for all other carbon atoms. Similarity restraints (SIMU) and rigid bond restraints (RIGU) were applied to all atoms except for Palladium during anisotropic refinement. The contribution of the electron density from disordered counterions and solvent molecules, which could not be modeled with discrete atomic positions were handled using the SQUEEZE<sup>15</sup> routine in PLATON. The solvent mask file (.fab) computed by PLATON was included in the SHELXL refinement via the ABIN instruction leaving the measured intensities untouched.

**d. *rac*-Me-Pd<sub>6</sub>L<sub>8</sub>**

Suitable single crystals were obtained by slow vapor diffusion of chloroform into a solution of the assembly over one month. Single-crystal X-ray diffraction data for *rac*-Me-Pd<sub>6</sub>L<sub>8</sub> were collected on a microfocus metal-jet diffractometer using Ga K $\alpha$  radiation ( $\lambda = 1.3405 \text{ \AA}$ ). Data reduction was performed with the CrysAlisPro package.<sup>16</sup> The structure was solved by direct methods and refined by full-matrix least-squares on F<sup>2</sup> with anisotropic displacement parameters using the SHELXTL software package.<sup>17</sup> Hydrogen atoms bound to carbon were placed in calculated positions and refined using a riding model. Disorder was modeled using standard crystallographic procedures, including appropriate constraints, restraints, and rigid-body refinement where necessary.

***Specific refinement details***

Crystallographic analysis of *rac*-Me-Pd<sub>6</sub>L<sub>8</sub> reveals a pronounced degree of disorder. Each Me-L ligand can adopt two alternative orientations corresponding to the *P* and *M* face-chirality states. Owing to interligand steric congestion and cooperative packing effects, the overall cage can be deconvoluted into two homochiral forms, Me-Pd<sub>6</sub>L<sup>*P*</sup><sub>8</sub> and Me-Pd<sub>6</sub>L<sup>*M*</sup><sub>8</sub> (Figure 63). Because of the limited data resolution and substantial atomic displacement parameters, thermal-parameter restraints (SIMU, DELU) were applied to all non-lanthanum atoms. Geometric restraints on bond lengths and angles (DFIX, SADI) were additionally imposed on the methyl groups. The benzene and pyridine fragments were treated as rigid groups using the appropriate constraints (AFIX 66) to improve model stability. A large amount of diffuse solvent and highly disordered counterions is present in the unit cell, accounting for 55.4% of the unit-cell volume. The corresponding diffuse electron density was therefore treated using the PLATON/SQUEEZE procedure.<sup>15</sup>

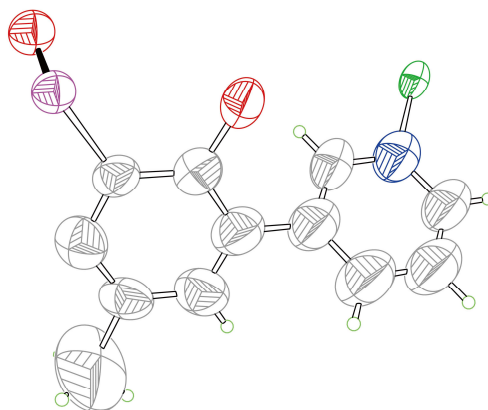

**Figure S62.** Ortep-drawing of the asymmetric unit in the crystal structure of *rac*-Me-Pd<sub>6</sub>L<sub>8</sub> at 30% probability level.

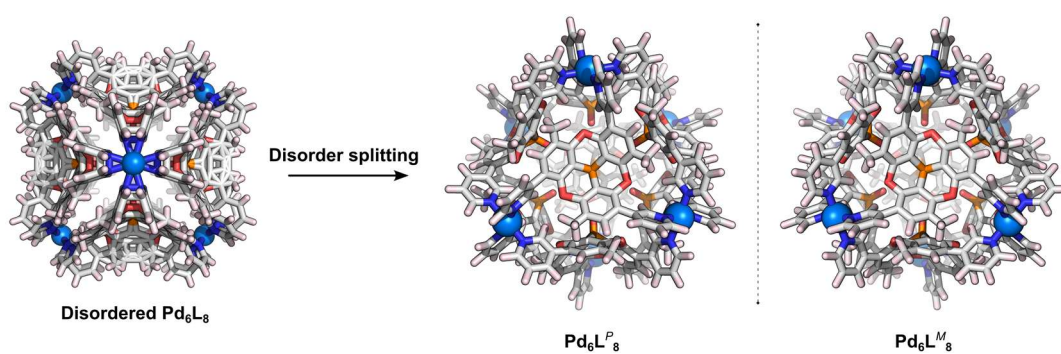

**Figure S63.** The disordered *rac*-Me-Pd<sub>6</sub>L<sub>8</sub> structure can be described as a superposition of two enantiomeric chiral cages, Me-Pd<sub>6</sub>L<sub>8</sub><sup>P</sup> and Me-Pd<sub>6</sub>L<sub>8</sub><sup>M</sup>.

## 10 References

- (1) Yamamura, M.; Saito, T.; Nabeshima, T. Phosphorus-Containing Chiral Molecule for Fullerene Recognition Based on Concave/Convex Interaction. *J. Am. Chem. Soc.* **2014**, *136*, 14299-14306.
- (2) Vandeputte, E.; Antonetti, E.; Nava, P.; Dutasta, J.-P.; Chatelet, B.; Moraleda, D.; Nuel, D.; Giordano, L.; Martinez, A., Straightforward Access to Chiral Phosphangulene Derivatives. *J. Org. Chem.* **2024**, *89*, 5314-5319.
- (3) Crowley, J. D.; Goshe, A. J.; Bosnich, B. Molecular recognition. Self-assembly of molecular trigonal prisms and their host-guest adducts. *Chem. Commun.* **2003**, 2824-2825.
- (4) Maglic, J. B.; Lavendomme, R. MoloVol: an easy-to-use program for analyzing cavities, volumes and surface areas of chemical structures. *J. Appl. Crystallogr.* **2022**, *55*, 1033-1044.
- (5) Neese, F. Software update: The ORCA program system—Version 5.0. *WIREs Comput. Mol. Sci.* **2022**, *12*, e1606.
- (6) Bannwarth, C.; Ehlert, S.; Grimme, S. GFN2-xTB—An Accurate and Broadly Parametrized Self-Consistent Tight-Binding Quantum Chemical Method with Multipole Electrostatics and Density-Dependent Dispersion Contributions. *J. Chem. Theory Comput.* **2019**, *15*, 1652-1671.
- (7) Grimme, S.; Hansen, A.; Ehlert, S.; Mewes, J.-M. r<sup>2</sup>SCAN-3c: A “Swiss army knife” composite electronic-structure method. *J. Chem. Phys.* **2021**, *154*, 064103.
- (8) Barone, V.; Cossi, M. Quantum Calculation of Molecular Energies and Energy Gradients in Solution by a Conductor Solvent Model. *J. Phys. Chem. A.* **1998**, *102*, 1995-2001.
- (9) Lu, T.; Chen, F. Multiwfn: A multifunctional wavefunction analyzer. *J. Comput. Chem.* **2012**, *33*, 580-592.
- (10) Bruker, *SAINTE*, V8.41, Bruker AXS SE, Karlsruhe, Germany.
- (11) Krause, L.; Herbst-Irmer, R.; Sheldrick, G. M.; Stalke, D. Comparison of silver and molybdenum microfocus X-ray sources for single-crystal structure determination. *J. Appl. Cryst.* **2015**, *48*, 3-10.
- (12) Sheldrick, G. SHELXT - Integrated space-group and crystal-structure determination. *Acta Crystallogr., Sect. A* **2015**, *71*, 3-8.
- (13) Sheldrick, G. Crystal structure refinement with SHELXL. *Acta Crystallogr., Sect. C* **2015**, *71*, 3-8.
- (14) Hubschle, C. B.; Sheldrick, G. M.; Dittrich, B. ShelXle: a Qt graphical user interface for SHELXL. *J. Appl. Crystallogr.* **2011**, *44*, 1281-1284.
- (15) Spek, A. PLATON SQUEEZE: a tool for the calculation of the disordered solvent contribution to the calculated structure factors. *Acta Crystallogr., Sect. C* **2015**, *71*, 9-18.
- (16) Agilent Technologies, CrysAlisPro v. 1.171.36.28, **2013**.
- (17) Sheldrick, G. M. A short history of SHELX. *Acta Crystallogr. Sect. A*, **2008**, *64*, 112.
